# Supplementary material for: Genome-Wide Identification and Characterization of Caffeic Acid O-Methyltransferase Gene Family in Soybean
Source: Plants (Basel). 2021 Dec 20;10(12):2816. doi: 10.3390/plants10122816 (PMC8703356; doi:10.3390/plants10122816)
Supplement: Supplementary file 1 [file plants-10-02816-s001.zip]

Archive with 12 entries (12 files):
- Figure S1. Genomic collinearity analysis in soybean.pdf
- Table S1. The length, the amnio acid sequence, and the position of COMT gene family of chromosomes.xlsx
- Table S10. The numbers of cis-elements in GmCOMT gene family.xlsx
- Table S11. The primers of qRT-PCR.xlsx
- Table S2. The number of COMTs in Glycine max, Arabidopsis thaliana, Solanum lycopersicum and Brassic rapa.xlsx
- Table S3. Width, Sites, E-value of GmCOMTs conserved motif.xlsx
- Table S4. The genes that contain a collinear relationship and the location of soybean COMTs.xlsx
- Table S5. The funtional annotations of the COMT genes in soybean.xlsx
- Table S6. Analysis of whole genome duplication (WGD) in soybean.xlsx
- Table S7. Analysis of whole genome duplication (WGD) in GmCOMTs subfamily.xlsx
- Table S8. KaKs calculation of the paralog pairs of SET and COMT in soybean..xlsx
- Table S9. Prediction of cis-elements of GmCOMT gene family.xlsx
