# Supplementary material for: Genome-Wide Identification and Characterization of Caffeic Acid O-Methyltransferase Gene Family in Soybean
Source: Plants (Basel). 2021 Dec 20;10(12):2816. doi: 10.3390/plants10122816 (PMC8703356; doi:10.3390/plants10122816)
Supplement: Supplementary file 1 [file plants-10-02816-s001.zip › Table S1. The length, the amnio acid sequence, and the position of COMT gene family of chromosomes.xlsx]

## Sheet: Sheet1
Table S1. The length, the amnio acid sequence, and the position of COMT gene family of chromosomes.
Gene name	Gene ID	Length(bp)	Coding sequence length(bp)	Chromosome localization	Encode protein length(aa)	Genomic sequence length(bp)	Transcript sequence length(bp)	pI	Molecular weight
GmCOMT1	Glyma.06G286700.1	2885	1068	Chr06:47527698..47530582	355	2885	1477	5.66	40579
GmCOMT2	Glyma.06G286200.1	1396	1080	Chr06:47465164..47467099	359	1936	1203	5.28	40630.7
GmCOMT3	Glyma.12G119600.1	1505	981	Chr12:12697178..12698682	326	1505	981	5.2	36630.2
GmCOMT4	Glyma.06G286600.1	1778	1059	Chr06:47486321..47488098	352	1778	1380	5.24	39784.1
GmCOMT5	Glyma.02G233100.1	1349	687	Chr02:42063269..42064617	228	1349	687	5.45	25169.2
GmCOMT6	Glyma.14G200800.1	1614	852	Chr14:46583312..46584925	283	1614	852	6.11	31937.2
GmCOMT7	Glyma.14G200900.1	9540	1077	Chr14:46590603..46600142	358	9540	1970	6.1	40396.9
GmCOMT8	Glyma.14G201100.1	2286	1077	Chr14:46614146..46616431	358	2286	1737	5.87	40398.9
GmCOMT9	Glyma.14G200700.1	2188	954	Chr14:46563268..46565455	317	2188	1332	5.77	36199.8
GmCOMT10	Glyma.14G201000.1	1128	729	Chr14:46598261..46599388	242	1128	729	5.85	27068.3
GmCOMT11	Glyma.09G094400.1	2443	1062	Chr09:13197472..13199914	353	2443	1812	5.74	40053.4
GmCOMT12	Glyma.09G094600.1	1552	942	Chr09:13248456..13250007	313	1552	1011	5.69	35508.3
GmCOMT13	Glyma.10G176300.1	1223	822	Chr10:41003284..41004506	273	1223	822	6.2	30769.8
GmCOMT14	Glyma.10G176600.1	1268	1068	Chr10:41013027..41014294	355	1268	1160	5.09	39962.1
GmCOMT15	Glyma.10G176700.1	1444	1065	Chr10:41027227..41028670	354	1444	1329	5.45	39825.9
GmCOMT16	Glyma.20G213700.1	1516	1065	Chr20:45010959..45012474	354	1516	1412	5.45	39803.8
GmCOMT17	Glyma.10G176500.1	1512	1065	Chr10:41007940..41009451	354	1512	1407	5.46	39912
GmCOMT18	Glyma.20G213600.1	1372	1065	Chr20:45000255..45001626	354	1372	1065	5.67	39870.1
GmCOMT19	Glyma.20G213800.1	933	825	Chr20:45012725..45013657	274	933	825	5.65	31264.8
GmCOMT20	Glyma.20G213500.1	5000	1065	Chr20:44996231..45001230	354	5000	1617	5.77	39690.8
GmCOMT21	Glyma.08G246700.1	1717	969	Chr08:21363198..21364914	322	1717	1207	4.85	36415.9
GmCOMT22	Glyma.18G267500.1	2283	1080	Chr18:55179516..55181798	359	2283	1241	6.16	40508.1
GmCOMT23	Glyma.18G267800.1	1845	1065	Chr18:55192276..55194120	354	1845	1347	5.81	39712
GmCOMT24	Glyma.18G269600.1	4608	1149	Chr18:55329239..55333846	382	4608	2218	5.72	42846.6
GmCOMT25	Glyma.08G248000.1	1438	1065	Chr08:21553939..21555376	354	1438	1350	5.48	40025.2
GmCOMT26	Glyma.08G247000.1	1100	855	Chr08:21393885..21394984	284	1100	855	6.15	32183.7
GmCOMT27	Glyma.18G267900.1	1468	1062	Chr18:55199483..55200950	353	1468	1327	5.96	40073.6
GmCOMT28	Glyma.08G246900.1	1019	660	Chr08:21372889..21373907	219	1019	660	9.07	25273.7
GmCOMT29	Glyma.13G173800.1	1879	354	Chr13:28778148..28780026	117	1879	845	7.8	13689.8
GmCOMT30	Glyma.15G220700.1	1546	330	Chr15:39762795..39764340	109	1546	330	5.1	12722
GmCOMT31	Glyma.13G173300.1	1747	1098	Chr13:28730694..28732440	365	1747	1378	5.74	40669.9
GmCOMT32	Glyma.13G173600.1	1467	1098	Chr13:28770535..28772001	365	1467	1098	5.74	40669.9
GmCOMT33	Glyma.11G256500.1	1474	1101	Chr11:34622779..34624252	366	1474	1395	5.3	40550.6
GmCOMT34	Glyma.06G295700.1	7904	1110	Chr06:48460473..48468376	369	7904	3295	5.93	41508.9
GmCOMT35	Glyma.12G109800.1	7482	1092	Chr12:10458911..10466392	363	7482	2585	5.92	40919.2
GmCOMT36	Glyma.13G263200.1	8981	1068	Chr13:36654352..36663332	355	8981	1457	5.63	39913.8
GmCOMT37	Glyma.15G241100.1	4848	1071	Chr15:45747635..45752482	356	4848	1709	5.55	39823.8
GmCOMT38	Glyma.11G150800.1	3498	1101	Chr11:11842709..11846206	366	3498	1260	4.87	40591.8
GmCOMT39	Glyma.18G263700.1	1902	1137	Chr18:54897273..54899174	378	1902	1393	5.59	41749.1
GmCOMT40	Glyma.20G176100.1	1700	1083	Chr20:41337426..41339125	360	1700	1288	5.44	39905
GmCOMT41	Glyma.10G215700.1	2029	1110	Chr10:44760627..44762655	369	2029	1318	5.66	40823.1
GmCOMT42	Glyma.20G003500.1	2697	1113	Chr20:346199..348895	370	2697	1599	5.39	41126.1
GmCOMT43	Glyma.09G281900.1	2499	1074	Chr09:49746278..49748776	357	2499	1508	5.11	39877.7
GmCOMT44	Glyma.20G003600.1	3364	552	Chr20:350171..353534	183	3364	1329	8.41	20998.6
GmCOMT45	Glyma.09G281800.1	1922	1110	Chr09:49738939..49740860	369	1922	1429	5.96	41024.9
GmCOMT46	Glyma.19G260700.1	2693	1119	Chr19:50386182..50388874	372	2693	1397	5.26	41622.9
GmCOMT47	Glyma.07G048900.1	3966	1119	Chr07:4156669..4160634	372	3966	1425	5.17	41308.5
GmCOMT48	Glyma.07G048800.1	2289	1065	Chr07:4151161..4153449	354	2289	1269	5.8	38928.1
GmCOMT49	Glyma.07G048700.1	2216	984	Chr07:4146598..4148813	327	2216	984	4.92	36182.9
GmCOMT50	Glyma.14G005000.1	1498	621	Chr14:408628..410125	206	1498	621	5.86	22705.2
GmCOMT51	Glyma.04G227700.1	2237	1098	Chr04:49704598..49706834	365	2237	1544	5.74	39969.3
GmCOMT52	Glyma.04G227800.1	2526	1002	Chr04:49708370..49710895	333	2526	1002	5.36	36308.9
GmCOMT53	Glyma.06G137200.1	2223	1101	Chr06:11232269..11234491	366	2223	1317	5.68	40177.6
GmCOMT54	Glyma.06G137300.1	2398	1098	Chr06:11237072..11239469	365	2398	1398	5.4	39826.2
GmCOMT55	Glyma.06G137100.1	3477	1098	Chr06:11225188..11228664	365	3477	1402	5.58	39895.2
