# Supplementary material for: Genome-Wide Identification and Characterization of Caffeic Acid O-Methyltransferase Gene Family in Soybean
Source: Plants (Basel). 2021 Dec 20;10(12):2816. doi: 10.3390/plants10122816 (PMC8703356; doi:10.3390/plants10122816)
Supplement: Supplementary file 1 [file plants-10-02816-s001.zip › Table S2. The number of COMTs in Glycine max, Arabidopsis thaliana, Solanum lycopersicum and Brassic rapa.xlsx]

## Sheet: Arabidopsis
Table S2. The accession numbers and gene names of PYL-PP2C-SnRK2 gene families in Arabidopsis.
AtPYR1	AT4G17870
AtPYL1	AT5G46790
AtPYL2	AT2G26040
AtPYL3	AT1G73000
AtPYL4	AT2G38310
AtPYL5	AT5G05440
AtPYL6	AT2G40330
AtPYL7	AT4G01026
AtPYL8	AT5G53160
AtPYL9	AT1G01360
AtPYL10	AT4G27920
AtPYL11	AT5G45860
AtPYL12	AT5G45870
AtPYL13	AT4G18620
AtPP2C1	AT1G03590
AtPP2C2	AT1G07160
AtPP2C3	AT1G07430
AtPP2C4	AT1G07630
AtPP2C5	AT1G09160
AtPP2C6	AT1G16220
AtPP2C7	AT1G17545
AtPP2C8	AT1G17550
AtPP2C9	AT1G18030
AtPP2C10	AT1G34750
AtPP2C11	AT1G43900
AtPP2C12	AT1G47380
AtSnRK1	AT1G10940
AtSnRK2	AT1G60940
AtSnRK3	AT1G78290
AtSnRK4	AT3G50500
AtSnRK5	AT4G33950
AtSnRK6	AT4G40010
AtSnRK7	AT5G08590
AtSnRK8	AT5G63650
AtSnRK9	AT5G66880
AtSnRK10	AT2G63650

## Sheet: rice
Table S2. The number of COMTs in Glycine max, Arabidopsis thaliana, Solanum lycopersicum and Brassic rapa.
Category	Glycine max	Arabidopsis thaliana	Solanum lycopersicum	Brassic rapa
Group I	35	0	12	0
Group II	20	14	5	25
Total number	55	14	17	25
