# Supplementary material for: Genome-Wide Identification and Characterization of Caffeic Acid O-Methyltransferase Gene Family in Soybean
Source: Plants (Basel). 2021 Dec 20;10(12):2816. doi: 10.3390/plants10122816 (PMC8703356; doi:10.3390/plants10122816)
Supplement: Supplementary file 1 [file plants-10-02816-s001.zip › Table S3. Width, Sites, E-value of GmCOMTs conserved motif.xlsx]

## Sheet: Sheet1
Table S3. Width, Sites, E-value of GmCOMTs conserved motif.
	Motif1	Motif2	Motif3	Motif4	Motif5	Motif6	Motif7	Motif8	Motif9	Motif10
E-value	8.7e-1132	3.6e-859	9.1e-739	1.1e-537	2.7e-356	8.4e-382	7.6e-290	1.1e-287	6.8e-240	1.2e-209
Sites	49	49	29	48	44	27	28	52	46	52
Width	33	29	41	21	21	28	29	15	18	11
