# Supplementary material for: Genome-Wide Identification and Characterization of Caffeic Acid O-Methyltransferase Gene Family in Soybean
Source: Plants (Basel). 2021 Dec 20;10(12):2816. doi: 10.3390/plants10122816 (PMC8703356; doi:10.3390/plants10122816)
Supplement: Supplementary file 1 [file plants-10-02816-s001.zip › Table S4. The genes that contain a collinear relationship and the location of soybean COMTs.xlsx]

## Sheet: Sheet1
Table S4. The genes that contain a collinear relationship and the location of soybean COMTs.
Gene Name	Chr	Start	End		Gene Name	Chr	Start	End
GmCOMT5	Chr02	42063269	42064617	Links	GmCOMT9	Chr14	46563268	46565455
GmCOMT51	Chr04	49704598	49706834	Links	GmCOMT55	Chr06	11225188	11228664
GmCOMT2	Chr06	47465164	47467099	Links	GmCOMT3	Chr12	12697178	12698682
GmCOMT34	Chr06	48460473	48468376	Links	GmCOMT35	Chr12	10458911	10466392
GmCOMT49	Chr07	4146598	4148813	Links	GmCOMT46	Chr19	50386182	50388874
GmCOMT21	Chr08	21363198	21364914	Links	GmCOMT22	Chr18	55179516	55181798
GmCOMT45	Chr09	49738939	49740860	Links	GmCOMT42	Chr20	346199	348895
GmCOMT13	Chr10	41003284	41004506	Links	GmCOMT16	Chr20	45010959	45012474
GmCOMT17	Chr10	41007940	41009451	Links	GmCOMT20	Chr20	44996231	45001230
GmCOMT41	Chr10	44760627	44762655	Links	GmCOMT40	Chr20	41337426	41339125
