# Supplementary material for: Genome-Wide Identification and Characterization of Caffeic Acid O-Methyltransferase Gene Family in Soybean
Source: Plants (Basel). 2021 Dec 20;10(12):2816. doi: 10.3390/plants10122816 (PMC8703356; doi:10.3390/plants10122816)
Supplement: Supplementary file 1 [file plants-10-02816-s001.zip › Table S5. The funtional annotations of the COMT genes in soybean.xlsx]

## Sheet: Arabidopsis
Table S2. The accession numbers and gene names of PYL-PP2C-SnRK2 gene families in Arabidopsis.
AtPYR1	AT4G17870
AtPYL1	AT5G46790
AtPYL2	AT2G26040
AtPYL3	AT1G73000
AtPYL4	AT2G38310
AtPYL5	AT5G05440
AtPYL6	AT2G40330
AtPYL7	AT4G01026
AtPYL8	AT5G53160
AtPYL9	AT1G01360
AtPYL10	AT4G27920
AtPYL11	AT5G45860
AtPYL12	AT5G45870
AtPYL13	AT4G18620
AtPP2C1	AT1G03590
AtPP2C2	AT1G07160
AtPP2C3	AT1G07430
AtPP2C4	AT1G07630
AtPP2C5	AT1G09160
AtPP2C6	AT1G16220
AtPP2C7	AT1G17545
AtPP2C8	AT1G17550
AtPP2C9	AT1G18030
AtPP2C10	AT1G34750
AtPP2C11	AT1G43900
AtPP2C12	AT1G47380
AtSnRK1	AT1G10940
AtSnRK2	AT1G60940
AtSnRK3	AT1G78290
AtSnRK4	AT3G50500
AtSnRK5	AT4G33950
AtSnRK6	AT4G40010
AtSnRK7	AT5G08590
AtSnRK8	AT5G63650
AtSnRK9	AT5G66880
AtSnRK10	AT2G63650

## Sheet: rice
Table S5. The funtional annotations of the COMT genes in soybean.
Glyma Name	Gene Ontology Cellular Component IDs	Gene Ontology Cellular Component Descriptions
Glyma.02G233100	GO:0005634 GO:0005829	cytosol; nucleus
Glyma.04G227700	GO:0005634 GO:0005737 GO:0005829 GO:0005886 GO:0009506	cytoplasm; cytosol; nucleus; plasma membrane; plasmodesma
Glyma.04G227800	GO:0005634 GO:0005737 GO:0005829 GO:0005886 GO:0009506	cytoplasm; cytosol; nucleus; plasma membrane; plasmodesma
Glyma.06G137100	GO:0005634 GO:0005737 GO:0005829 GO:0005886 GO:0009506	cytoplasm; cytosol; nucleus; plasma membrane; plasmodesma
Glyma.06G137200	GO:0005634 GO:0005737 GO:0005829 GO:0005886 GO:0009506	cytoplasm; cytosol; nucleus; plasma membrane; plasmodesma
Glyma.06G137300	GO:0005634 GO:0005737 GO:0005829 GO:0005886 GO:0009506	cytoplasm; cytosol; nucleus; plasma membrane; plasmodesma
Glyma.06G286200	GO:0005634 GO:0005829	cytosol; nucleus
Glyma.06G286600	GO:0005634 GO:0005829	cytosol; nucleus
Glyma.06G286700	GO:0005634 GO:0005829	cytosol; nucleus
Glyma.06G295700	GO:0005634 GO:0005737 GO:0005829 GO:0005886 GO:0009506	cytoplasm; cytosol; nucleus; plasma membrane; plasmodesma
Glyma.07G048700	GO:0005634 GO:0005737 GO:0005829 GO:0005886 GO:0009506	cytoplasm; cytosol; nucleus; plasma membrane; plasmodesma
Glyma.07G048800	GO:0005634 GO:0005737 GO:0005829 GO:0005886 GO:0009506	cytoplasm; cytosol; nucleus; plasma membrane; plasmodesma
Glyma.07G048900	GO:0005634 GO:0005737 GO:0005829 GO:0005886 GO:0009506	cytoplasm; cytosol; nucleus; plasma membrane; plasmodesma
Glyma.08G246700	GO:0005634 GO:0005829	cytosol; nucleus
Glyma.08G246900	GO:0005829	cytosol
Glyma.08G247000	GO:0005829	cytosol
Glyma.08G248000	GO:0005829	cytosol
Glyma.09G094400	GO:0005829	cytosol
Glyma.09G094600	GO:0005829	cytosol
Glyma.09G281800	GO:0005634 GO:0005737 GO:0005829 GO:0005886 GO:0009506	cytoplasm; cytosol; nucleus; plasma membrane; plasmodesma
Glyma.09G281900	GO:0005634 GO:0005737 GO:0005829 GO:0005886 GO:0009506	cytoplasm; cytosol; nucleus; plasma membrane; plasmodesma
Glyma.10G176300	GO:0005829	cytosol
Glyma.10G176500	GO:0005634 GO:0005829	cytosol; nucleus
Glyma.10G176600	GO:0005634 GO:0005829	cytosol; nucleus
Glyma.10G176700	GO:0005634 GO:0005829	cytosol; nucleus
Glyma.10G215700	GO:0005634 GO:0005737 GO:0005829 GO:0005886 GO:0009506	cytoplasm; cytosol; nucleus; plasma membrane; plasmodesma
Glyma.11G150800	GO:0005634 GO:0005737 GO:0005829 GO:0005886 GO:0009506	cytoplasm; cytosol; nucleus; plasma membrane; plasmodesma
Glyma.11G256500	GO:0005634 GO:0005829	cytosol; nucleus
Glyma.12G109800	GO:0005634 GO:0005737 GO:0005829 GO:0005886 GO:0009506	cytoplasm; cytosol; nucleus; plasma membrane; plasmodesma
Glyma.12G119600	GO:0005634 GO:0005829	cytosol; nucleus
Glyma.13G173300	GO:0005829	cytosol
Glyma.13G173600	GO:0005829	cytosol
Glyma.13G173800	GO:0005829	cytosol
Glyma.13G263200	NA	NA
Glyma.14G005000	GO:0005634 GO:0005737 GO:0005829 GO:0005886 GO:0009506	cytoplasm; cytosol; nucleus; plasma membrane; plasmodesma
Glyma.14G200700	GO:0005634 GO:0005829	cytosol; nucleus
Glyma.14G200800	GO:0005829	cytosol
Glyma.14G200900	GO:0005634 GO:0005829	cytosol; nucleus
Glyma.14G201000	GO:0005634 GO:0005829	cytosol; nucleus
Glyma.14G201100	GO:0005634 GO:0005829	cytosol; nucleus
Glyma.15G220700	GO:0005829 GO:0009507	chloroplast; cytosol
Glyma.15G241100	NA	NA
Glyma.18G263700	GO:0005634 GO:0005737 GO:0005829 GO:0005886 GO:0009506	cytoplasm; cytosol; nucleus; plasma membrane; plasmodesma
Glyma.18G267500	GO:0005829	cytosol
Glyma.18G267800	GO:0005829	cytosol
Glyma.18G267900	GO:0005829	cytosol
Glyma.18G269600	GO:0005829	cytosol
Glyma.19G260700	GO:0005634 GO:0005737 GO:0005829 GO:0005886 GO:0009506	cytoplasm; cytosol; nucleus; plasma membrane; plasmodesma
Glyma.20G003500	GO:0005634 GO:0005737 GO:0005829 GO:0005886 GO:0009506	cytoplasm; cytosol; nucleus; plasma membrane; plasmodesma
Glyma.20G003600	GO:0005634 GO:0005737 GO:0005829 GO:0005886 GO:0009506	cytoplasm; cytosol; nucleus; plasma membrane; plasmodesma
Glyma.20G176100	GO:0005634 GO:0005737 GO:0005829 GO:0005886 GO:0009506	cytoplasm; cytosol; nucleus; plasma membrane; plasmodesma
Glyma.20G213500	GO:0005634 GO:0005829	cytosol; nucleus
Glyma.20G213600	GO:0005829	cytosol
Glyma.20G213700	GO:0005634 GO:0005829	cytosol; nucleus
Glyma.20G213800	NA	NA
