# Supplementary material for: Genome-Wide Identification and Characterization of Caffeic Acid O-Methyltransferase Gene Family in Soybean
Source: Plants (Basel). 2021 Dec 20;10(12):2816. doi: 10.3390/plants10122816 (PMC8703356; doi:10.3390/plants10122816)
Supplement: Supplementary file 1 [file plants-10-02816-s001.zip › Table S7. Analysis of whole genome duplication (WGD) in GmCOMTs subfamily.xlsx]

## Sheet: Sheet1
Table S7. Analysis of whole genome duplication (WGD) in GmCOMTs subfamily.
Type	Code	Number
Singleton	0	0
Dispersed	1	6
Proximal	2	6
Tandem	3	17
WGD or segmental	4	26
