# Supplementary material for: Genome-Wide Identification and Characterization of Caffeic Acid O-Methyltransferase Gene Family in Soybean
Source: Plants (Basel). 2021 Dec 20;10(12):2816. doi: 10.3390/plants10122816 (PMC8703356; doi:10.3390/plants10122816)
Supplement: Supplementary file 1 [file plants-10-02816-s001.zip › Table S8. KaKs calculation of the paralog pairs of SET and COMT in soybean..xlsx]

## Sheet: Sheet1
Table S8. Ka/Ks calculation of the paralog pairs of SET and COMT in soybean.
Gene	Ks	Ka	Ka/Ks	Selection Pressure	Duplication time(MYA)
GmCOMT5_GmCOMT9	0.142864	0.0462702	0.323876	Purifying Selction	4.76212
GmCOMT51_GmCOMT55	0.215679	0.0210878	0.0977741	Purifying Selction	7.18931
GmCOMT2_GmCOMT3	0.182689	0.0646606	0.353939	Purifying Selction	6.08962
GmCOMT34_GmCOMT35	0.24696	0.0187227	0.0758126	Purifying Selction	8.232
GmCOMT49_GmCOMT46	0.889191	0.275161	0.309451	Purifying Selction	29.6397
GmCOMT21_GmCOMT22	0.224404	0.12409	0.552975	Purifying Selction	7.48012
GmCOMT45_GmCOMT42	0.580047	0.171934	0.296413	Purifying Selction	19.3349
GmCOMT13_GmCOMT16	0.318872	0.107172	0.336097	Purifying Selction	10.6291
GmCOMT17_GmCOMT20	0.237411	0.11247	0.473735	Purifying Selction	7.9137
GmCOMT41_GmCOMT40	0.149397	0.0372285	0.249191	Purifying Selction	4.97991
