# Supplementary material for: Genome-Wide Identification and Characterization of Caffeic Acid O-Methyltransferase Gene Family in Soybean
Source: Plants (Basel). 2021 Dec 20;10(12):2816. doi: 10.3390/plants10122816 (PMC8703356; doi:10.3390/plants10122816)
Supplement: Supplementary file 1 [file plants-10-02816-s001.zip › Table S9. Prediction of cis-elements of GmCOMT gene family.xlsx]

## Sheet: Sheet1
Table S9. Prediction of cis-elements of GmCOMT gene family.
Gene ID	Potential Elements		Start	End	Species	Potential Function
GmCOMT41	MYB	CAACAG	308	328	Arabidopsis thaliana
GmCOMT41	MYB	TAACCA	662	682	Arabidopsis thaliana
GmCOMT41	MYB	TAACCA	1764	1784	Arabidopsis thaliana
GmCOMT41	ERE	ATTTTAAA	94	114	Nicotiana glutinos
GmCOMT41	Box 4	ATTAAT	39	59	Petroselinum crispum	part of a conserved DNA module involved in light responsiveness
GmCOMT41	Box 4	ATTAAT	90	110	Petroselinum crispum	part of a conserved DNA module involved in light responsiveness
GmCOMT41	Box 4	ATTAAT	319	339	Petroselinum crispum	part of a conserved DNA module involved in light responsiveness
GmCOMT41	Box 4	ATTAAT	368	388	Petroselinum crispum	part of a conserved DNA module involved in light responsiveness
GmCOMT41	Box 4	ATTAAT	1422	1442	Petroselinum crispum	part of a conserved DNA module involved in light responsiveness
GmCOMT41	Box 4	ATTAAT	1687	1707	Petroselinum crispum	part of a conserved DNA module involved in light responsiveness
GmCOMT41	Box 4	ATTAAT	1738	1758	Petroselinum crispum	part of a conserved DNA module involved in light responsiveness
GmCOMT41	GARE-motif	TCTGTTG	308	328	Brassica oleracea	gibberellin-responsive element
GmCOMT41	TCA-element	CCATCTTTTT	1066	1086	Nicotiana tabacum	cis-acting element involved in salicylic acid responsiveness
GmCOMT41	TCA-element	TCAGAAGAGG	1294	1314	Brassica oleracea	cis-acting element involved in salicylic acid responsiveness
GmCOMT41	TCA-element	TCAGAAGAGG	1568	1588	Brassica oleracea	cis-acting element involved in salicylic acid responsiveness
GmCOMT41	G-Box	CACGTT	237	257	Pisum sativum	cis-acting regulatory element involved in light responsiveness
GmCOMT41	Myb	TAACTG	701	721	Arabidopsis thaliana
GmCOMT41	I-box	gGATAAGGTG	868	888	Zea mays	part of a light responsive element
GmCOMT41	I-box	cCATATCCAAT	1589	1609	Flaveria trinervia	part of a light responsive element
GmCOMT41	CAAT-box	CAAT	1	21	Nicotiana glutinosa
GmCOMT41	CAAT-box	CAAT	50	70	Nicotiana glutinosa
GmCOMT41	CAAT-box	CAAT	59	79	Nicotiana glutinosa
GmCOMT41	CAAT-box	TGCCAAC	220	240	Petunia hybrida	common cis-acting element in promoter and enhancer regions
GmCOMT41	CAAT-box	CCAAT	276	296	Arabidopsis thaliana	common cis-acting element in promoter and enhancer regions
GmCOMT41	CAAT-box	CAAAT	354	374	Pisum sativum	common cis-acting element in promoter and enhancer regions
GmCOMT41	CAAT-box	CCAAT	429	449	Arabidopsis thaliana	common cis-acting element in promoter and enhancer regions
GmCOMT41	CAAT-box	CAAT	430	450	Nicotiana glutinosa
GmCOMT41	CAAT-box	CAAT	511	531	Nicotiana glutinosa
GmCOMT41	CAAT-box	CAAT	519	539	Nicotiana glutinosa
GmCOMT41	CAAT-box	CAAT	551	571	Nicotiana glutinosa
GmCOMT41	CAAT-box	CAAAT	655	675	Pisum sativum	common cis-acting element in promoter and enhancer regions
GmCOMT41	CAAT-box	CAAT	710	730	Nicotiana glutinosa
GmCOMT41	CAAT-box	CAAT	783	803	Nicotiana glutinosa
GmCOMT41	CAAT-box	CAAT	798	818	Nicotiana glutinosa
GmCOMT41	CAAT-box	CAAAT	816	836	Pisum sativum	common cis-acting element in promoter and enhancer regions
GmCOMT41	CAAT-box	CAAT	845	865	Nicotiana glutinosa
GmCOMT41	CAAT-box	CAAAT	938	958	Pisum sativum	common cis-acting element in promoter and enhancer regions
GmCOMT41	CAAT-box	CAAT	950	970	Nicotiana glutinosa
GmCOMT41	CAAT-box	CAAT	1098	1118	Nicotiana glutinosa
GmCOMT41	CAAT-box	CAAAT	1105	1125	Pisum sativum	common cis-acting element in promoter and enhancer regions
GmCOMT41	CAAT-box	CAAT	1141	1161	Nicotiana glutinosa
GmCOMT41	CAAT-box	CAAT	1145	1165	Nicotiana glutinosa
GmCOMT41	CAAT-box	CAAT	1186	1206	Nicotiana glutinosa
GmCOMT41	CAAT-box	CAAT	1326	1346	Nicotiana glutinosa
GmCOMT41	CAAT-box	CAAAT	1458	1478	Pisum sativum	common cis-acting element in promoter and enhancer regions
GmCOMT41	CAAT-box	CAAT	1476	1496	Nicotiana glutinosa
GmCOMT41	CAAT-box	CCAAT	1595	1615	Arabidopsis thaliana	common cis-acting element in promoter and enhancer regions
GmCOMT41	CAAT-box	CAAT	1596	1616	Nicotiana glutinosa
GmCOMT41	CAAT-box	CAAT	1608	1628	Nicotiana glutinosa
GmCOMT41	CAAT-box	CAAAT	1650	1670	Pisum sativum	common cis-acting element in promoter and enhancer regions
GmCOMT41	CAAT-box	CAAT	1667	1687	Nicotiana glutinosa
GmCOMT41	CAAT-box	CAAT	1721	1741	Nicotiana glutinosa
GmCOMT41	CAAT-box	CCAAT	1803	1823	Arabidopsis thaliana	common cis-acting element in promoter and enhancer regions
GmCOMT41	CAAT-box	CAAT	1804	1824	Nicotiana glutinosa
GmCOMT41	CAAT-box	CAAAT	1808	1828	Pisum sativum	common cis-acting element in promoter and enhancer regions
GmCOMT41	CAAT-box	CAAAT	1871	1891	Pisum sativum	common cis-acting element in promoter and enhancer regions
GmCOMT41	CAAT-box	CAAT	1953	1973	Nicotiana glutinosa
GmCOMT41	STRE	AGGGG	853	873	Arabidopsis thaliana
GmCOMT41	STRE	AGGGG	1015	1035	Arabidopsis thaliana
GmCOMT41	TC-rich repeats	GTTTTCTTAC	1118	1138	Nicotiana tabacum	cis-acting element involved in defense and stress responsiveness
GmCOMT41	O2-site	GATGACATGG	206	226	Zea mays	cis-acting regulatory element involved in zein metabolism regulation
GmCOMT41	O2-site	GATGA(C/T)(A/G)TG(A/G)	1515	1535	Zea mays	cis-acting regulatory element involved in zein metabolism regulation
GmCOMT41	DRE1	ACCGAGA	1202	1222	Zea mays
GmCOMT41	TCCC-motif	TCTCCCT	173	193	Spinacia oleracea	part of a light responsive element
GmCOMT41	GT1-motif	GGTTAA	902	922	Arabidopsis thaliana	light responsive element
GmCOMT41	GT1-motif	GGTTAA	1047	1067	Arabidopsis thaliana	light responsive element
GmCOMT41	WRE3	CCACCT	622	642	Pisum sativum
GmCOMT41	MRE	AACCTAA	1125	1145	Petroselinum crispum	MYB binding site involved in light responsiveness
GmCOMT41	MRE	AACCTAA	1158	1178	Petroselinum crispum	MYB binding site involved in light responsiveness
GmCOMT41	ARE	AAACCA	1800	1820	Zea mays	cis-acting regulatory element essential for the anaerobic induction
GmCOMT41	AE-box	AGAAACAA	1989	2009	Arabidopsis thaliana	part of a module for light response
GmCOMT41	ABRE	ACGTG	238	258	Arabidopsis thaliana	cis-acting element involved in the abscisic acid responsiveness
GmCOMT17	STRE	AGGGG	1620	1640	Arabidopsis thaliana
GmCOMT17	P-box	CCTTTTG	473	493	Oryza sativa	gibberellin-responsive element
GmCOMT17	P-box	CCTTTTG	1512	1532	Oryza sativa	gibberellin-responsive element
GmCOMT17	chs-CMA1a	TTACTTAA	1687	1707	Daucus carota	part of a light responsive element
GmCOMT17	CAAT-box	CCAAT	49	69	Arabidopsis thaliana	common cis-acting element in promoter and enhancer regions
GmCOMT17	CAAT-box	CAAAT	135	155	Pisum sativum	common cis-acting element in promoter and enhancer regions
GmCOMT17	CAAT-box	CAAT	143	163	Nicotiana glutinosa
GmCOMT17	CAAT-box	CAAT	162	182	Nicotiana glutinosa
GmCOMT17	CAAT-box	CAAT	180	200	Nicotiana glutinosa
GmCOMT17	CAAT-box	CAAT	240	260	Nicotiana glutinosa
GmCOMT17	CAAT-box	CAAAT	292	312	Pisum sativum	common cis-acting element in promoter and enhancer regions
GmCOMT17	CAAT-box	CCAAT	317	337	Arabidopsis thaliana	common cis-acting element in promoter and enhancer regions
GmCOMT17	CAAT-box	CAAT	318	338	Nicotiana glutinosa
GmCOMT17	CAAT-box	CAAT	383	403	Nicotiana glutinosa
GmCOMT17	CAAT-box	CAAT	385	405	Nicotiana glutinosa
GmCOMT17	CAAT-box	CAAAT	415	435	Pisum sativum	common cis-acting element in promoter and enhancer regions
GmCOMT17	CAAT-box	CAAT	466	486	Nicotiana glutinosa
GmCOMT17	CAAT-box	CAAAT	584	604	Pisum sativum	common cis-acting element in promoter and enhancer regions
GmCOMT17	CAAT-box	CAAT	625	645	Nicotiana glutinosa
GmCOMT17	CAAT-box	CAAAT	672	692	Pisum sativum	common cis-acting element in promoter and enhancer regions
GmCOMT17	CAAT-box	CAAT	695	715	Nicotiana glutinosa
GmCOMT17	CAAT-box	CAAAT	771	791	Pisum sativum	common cis-acting element in promoter and enhancer regions
GmCOMT17	CAAT-box	CAAT	790	810	Nicotiana glutinosa
GmCOMT17	CAAT-box	CAAAT	794	814	Pisum sativum	common cis-acting element in promoter and enhancer regions
GmCOMT17	CAAT-box	CAAAT	835	855	Pisum sativum	common cis-acting element in promoter and enhancer regions
GmCOMT17	CAAT-box	CAAT	904	924	Nicotiana glutinosa
GmCOMT17	CAAT-box	CAAT	973	993	Nicotiana glutinosa
GmCOMT17	CAAT-box	CCAAT	1012	1032	Arabidopsis thaliana	common cis-acting element in promoter and enhancer regions
GmCOMT17	CAAT-box	CAAT	1013	1033	Nicotiana glutinosa
GmCOMT17	CAAT-box	CAAT	1052	1072	Nicotiana glutinosa
GmCOMT17	CAAT-box	CCAAT	1093	1113	Arabidopsis thaliana	common cis-acting element in promoter and enhancer regions
GmCOMT17	CAAT-box	CAAT	1219	1239	Nicotiana glutinosa
GmCOMT17	CAAT-box	CAAAT	1394	1414	Pisum sativum	common cis-acting element in promoter and enhancer regions
GmCOMT17	CAAT-box	CAAT	1408	1428	Nicotiana glutinosa
GmCOMT17	CAAT-box	CCAAT	1448	1468	Arabidopsis thaliana	common cis-acting element in promoter and enhancer regions
GmCOMT17	CAAT-box	CAAT	1449	1469	Nicotiana glutinosa
GmCOMT17	CAAT-box	CAAT	1461	1481	Nicotiana glutinosa
GmCOMT17	CAAT-box	CAAT	1476	1496	Nicotiana glutinosa
GmCOMT17	CAAT-box	CAAT	1607	1627	Nicotiana glutinosa
GmCOMT17	CAAT-box	CCAAT	1613	1633	Arabidopsis thaliana	common cis-acting element in promoter and enhancer regions
GmCOMT17	CAAT-box	CAAT	1614	1634	Nicotiana glutinosa
GmCOMT17	CAAT-box	CAAT	1626	1646	Nicotiana glutinosa
GmCOMT17	CAAT-box	CCAAT	1761	1781	Arabidopsis thaliana	common cis-acting element in promoter and enhancer regions
GmCOMT17	CAAT-box	CAAT	1762	1782	Nicotiana glutinosa
GmCOMT17	CAAT-box	CAAT	1780	1800	Nicotiana glutinosa
GmCOMT17	CAAT-box	CAAT	1826	1846	Nicotiana glutinosa
GmCOMT17	CAAT-box	CAAT	1861	1881	Nicotiana glutinosa
GmCOMT17	CAAT-box	CCAAT	1936	1956	Arabidopsis thaliana	common cis-acting element in promoter and enhancer regions
GmCOMT17	CAAT-box	CAAT	1937	1957	Nicotiana glutinosa
GmCOMT17	CAAT-box	CAAAT	1978	1998	Pisum sativum	common cis-acting element in promoter and enhancer regions
GmCOMT17	G-box	TACGTG	68	88	Arabidopsis thaliana	cis-acting regulatory element involved in light responsiveness
GmCOMT17	G-box	CACGAC	1042	1062	Zea mays	cis-acting regulatory element involved in light responsiveness
GmCOMT17	G-box	CACGTC	1738	1758	Zea mays	cis-acting regulatory element involved in light responsiveness
GmCOMT17	G-box	CAGACGTGGCA	1885	1905	Nicotiana plumbaginifolia	cis-acting regulatory element involved in light responsiveness
GmCOMT17	G-box	CACGTC	1888	1908	Zea mays	cis-acting regulatory element involved in light responsiveness
GmCOMT17	ABRE	ACGTG	12	32	Arabidopsis thaliana	cis-acting element involved in the abscisic acid responsiveness
GmCOMT17	ABRE	ACGTG	69	89	Arabidopsis thaliana	cis-acting element involved in the abscisic acid responsiveness
GmCOMT17	ABRE	ACGTG	1739	1759	Arabidopsis thaliana	cis-acting element involved in the abscisic acid responsiveness
GmCOMT17	ABRE	ACGTG	1888	1908	Arabidopsis thaliana	cis-acting element involved in the abscisic acid responsiveness
GmCOMT17	MRE	AACCTAA	1250	1270	Petroselinum crispum	MYB binding site involved in light responsiveness
GmCOMT17	CAT-box	GCCACT	1028	1048	Arabidopsis thaliana	cis-acting regulatory element related to meristem expression
GmCOMT17	ARE	AAACCA	481	501	Zea mays	cis-acting regulatory element essential for the anaerobic induction
GmCOMT17	ARE	AAACCA	1694	1714	Zea mays	cis-acting regulatory element essential for the anaerobic induction
GmCOMT17	CCAAT-box	CAACGG	932	952	Hordeum vulgare	MYBHv1 binding site
GmCOMT17	GT1-motif	GGTTAA	432	452	Arabidopsis thaliana	light responsive element
GmCOMT17	GT1-motif	GGTTAAT	1908	1928	Avena sativa	light responsive element
GmCOMT17	WRE3	CCACCT	1697	1717	Pisum sativum
GmCOMT17	TATC-box	TATCCCA	863	883	Oryza sativa	cis-acting element involved in gibberellin-responsiveness
GmCOMT17	MYC	CAATTG	383	403	Arabidopsis thaliana
GmCOMT17	MYC	CATTTG	583	603	Arabidopsis thaliana
GmCOMT17	G-Box	CACGTT	12	32	Pisum sativum	cis-acting regulatory element involved in light responsiveness
GmCOMT17	LAMP-element	CTTTATCA	981	1001	Pisum sativum	part of a light responsive element
GmCOMT17	circadian	CAAAGATATC	955	975	Lycopersicon esculentum	cis-acting regulatory element involved in circadian control
GmCOMT17	TCA-element	TCAGAAGAGG	185	205	Brassica oleracea	cis-acting element involved in salicylic acid responsiveness
GmCOMT17	MYB	CAACCA	208	228	Arabidopsis thaliana
GmCOMT17	MYB	CAACAG	404	424	Arabidopsis thaliana
GmCOMT17	MYB	TAACCA	433	453	Arabidopsis thaliana
GmCOMT17	MYB	CAACAG	744	764	Arabidopsis thaliana
GmCOMT17	MYB	TAACCA	1907	1927	Arabidopsis thaliana
GmCOMT17	Box 4	ATTAAT	657	677	Petroselinum crispum	part of a conserved DNA module involved in light responsiveness
GmCOMT17	Box 4	ATTAAT	838	858	Petroselinum crispum	part of a conserved DNA module involved in light responsiveness
GmCOMT17	Myb	TAACTG	747	767	Arabidopsis thaliana
GmCOMT17	Myb	TAACTG	1786	1806	Arabidopsis thaliana
GmCOMT17	TCA	TCATCTTCAT	1191	1211	Pisum sativum
GmCOMT17	L-box	ATCCCACCTAC	1616	1636	Petroselinum crispum	part of a light responsive element
GmCOMT17	TCT-motif	TCTTAC	1226	1246	Arabidopsis thaliana	part of a light responsive element
GmCOMT17	W box	TTGACC	626	646	Arabidopsis thaliana
GmCOMT17	W box	TTGACC	1409	1429	Arabidopsis thaliana
GmCOMT14	MYC	CATTTG	1069	1089	Arabidopsis thaliana
GmCOMT14	G-Box	CACGTG	960	980	Pisum sativum	cis-acting regulatory element involved in light responsiveness
GmCOMT14	G-Box	CACGTT	1468	1488	Pisum sativum	cis-acting regulatory element involved in light responsiveness
GmCOMT14	Box 4	ATTAAT	178	198	Petroselinum crispum	part of a conserved DNA module involved in light responsiveness
GmCOMT14	Box 4	ATTAAT	203	223	Petroselinum crispum	part of a conserved DNA module involved in light responsiveness
GmCOMT14	Box 4	ATTAAT	302	322	Petroselinum crispum	part of a conserved DNA module involved in light responsiveness
GmCOMT14	Box 4	ATTAAT	320	340	Petroselinum crispum	part of a conserved DNA module involved in light responsiveness
GmCOMT14	Box 4	ATTAAT	474	494	Petroselinum crispum	part of a conserved DNA module involved in light responsiveness
GmCOMT14	Box 4	ATTAAT	480	500	Petroselinum crispum	part of a conserved DNA module involved in light responsiveness
GmCOMT14	Box 4	ATTAAT	1208	1228	Petroselinum crispum	part of a conserved DNA module involved in light responsiveness
GmCOMT14	Box 4	ATTAAT	1775	1795	Petroselinum crispum	part of a conserved DNA module involved in light responsiveness
GmCOMT14	MYB	TAACCA	83	103	Arabidopsis thaliana
GmCOMT14	MYB	CAACCA	410	430	Arabidopsis thaliana
GmCOMT14	MYB	CAACAG	1251	1271	Arabidopsis thaliana
GmCOMT14	MYB	TAACCA	1907	1927	Arabidopsis thaliana
GmCOMT14	ERE	ATTTTAAA	37	57	Nicotiana glutinos
GmCOMT14	CGTCA-motif	CGTCA	945	965	Hordeum vulgare	cis-acting regulatory element involved in the MeJA-responsiveness
GmCOMT14	CGTCA-motif	CGTCA	1123	1143	Hordeum vulgare	cis-acting regulatory element involved in the MeJA-responsiveness
GmCOMT14	Myb	TAACTG	536	556	Arabidopsis thaliana
GmCOMT14	Myb	TAACTG	729	749	Arabidopsis thaliana
GmCOMT14	Myb	TAACTG	1680	1700	Arabidopsis thaliana
GmCOMT14	TCA	TCATCTTCAT	1488	1508	Pisum sativum
GmCOMT14	TCA	TCATCTTCAT	1744	1764	Pisum sativum
GmCOMT14	TCT-motif	TCTTAC	1218	1238	Arabidopsis thaliana	part of a light responsive element
GmCOMT14	STRE	AGGGG	866	886	Arabidopsis thaliana
GmCOMT14	STRE	AGGGG	903	923	Arabidopsis thaliana
GmCOMT14	STRE	AGGGG	1041	1061	Arabidopsis thaliana
GmCOMT14	P-box	CCTTTTG	414	434	Oryza sativa	gibberellin-responsive element
GmCOMT14	P-box	CCTTTTG	1148	1168	Oryza sativa	gibberellin-responsive element
GmCOMT14	TGACG-motif	TGACG	945	965	Hordeum vulgare	cis-acting regulatory element involved in the MeJA-responsiveness
GmCOMT14	TGACG-motif	TGACG	1123	1143	Hordeum vulgare	cis-acting regulatory element involved in the MeJA-responsiveness
GmCOMT14	chs-CMA1a	TTACTTAA	1581	1601	Daucus carota	part of a light responsive element
GmCOMT14	CAAT-box	CAAAT	2	22	Pisum sativum	common cis-acting element in promoter and enhancer regions
GmCOMT14	CAAT-box	CAAT	98	118	Nicotiana glutinosa
GmCOMT14	CAAT-box	CAAAT	110	130	Pisum sativum	common cis-acting element in promoter and enhancer regions
GmCOMT14	CAAT-box	CAAT	176	196	Nicotiana glutinosa
GmCOMT14	CAAT-box	CAAAT	390	410	Pisum sativum	common cis-acting element in promoter and enhancer regions
GmCOMT14	CAAT-box	CAAT	472	492	Nicotiana glutinosa
GmCOMT14	CAAT-box	CAAT	490	510	Nicotiana glutinosa
GmCOMT14	CAAT-box	CCAAT	554	574	Arabidopsis thaliana	common cis-acting element in promoter and enhancer regions
GmCOMT14	CAAT-box	CAAT	555	575	Nicotiana glutinosa
GmCOMT14	CAAT-box	CAAAT	604	624	Pisum sativum	common cis-acting element in promoter and enhancer regions
GmCOMT14	CAAT-box	CAAT	633	653	Nicotiana glutinosa
GmCOMT14	CAAT-box	CAAT	678	698	Nicotiana glutinosa
GmCOMT14	CAAT-box	CAAAT	716	736	Pisum sativum	common cis-acting element in promoter and enhancer regions
GmCOMT14	CAAT-box	CAAT	988	1008	Nicotiana glutinosa
GmCOMT14	CAAT-box	CAAT	1020	1040	Nicotiana glutinosa
GmCOMT14	CAAT-box	CAAAT	1070	1090	Pisum sativum	common cis-acting element in promoter and enhancer regions
GmCOMT14	CAAT-box	CAAAT	1110	1130	Pisum sativum	common cis-acting element in promoter and enhancer regions
GmCOMT14	CAAT-box	CCAAT	1127	1147	Arabidopsis thaliana	common cis-acting element in promoter and enhancer regions
GmCOMT14	CAAT-box	CAAAT	1164	1184	Pisum sativum	common cis-acting element in promoter and enhancer regions
GmCOMT14	CAAT-box	CAAT	1167	1187	Nicotiana glutinosa
GmCOMT14	CAAT-box	CAAT	1311	1331	Nicotiana glutinosa
GmCOMT14	CAAT-box	CAAT	1355	1375	Nicotiana glutinosa
GmCOMT14	CAAT-box	CAAT	1391	1411	Nicotiana glutinosa
GmCOMT14	CAAT-box	CAAT	1397	1417	Nicotiana glutinosa
GmCOMT14	CAAT-box	CAAT	1656	1676	Nicotiana glutinosa
GmCOMT14	CAAT-box	CAAT	1737	1757	Nicotiana glutinosa
GmCOMT14	CAAT-box	CAAT	1826	1846	Nicotiana glutinosa
GmCOMT14	CAAT-box	CAAT	1861	1881	Nicotiana glutinosa
GmCOMT14	CAAT-box	CCAAT	1936	1956	Arabidopsis thaliana	common cis-acting element in promoter and enhancer regions
GmCOMT14	CAAT-box	CAAT	1937	1957	Nicotiana glutinosa
GmCOMT14	CAAT-box	CAAAT	1978	1998	Pisum sativum	common cis-acting element in promoter and enhancer regions
GmCOMT14	G-box	CTTCCACGTGGCA	957	977	Arabidopsis thaliana	cis-acting regulatory element involved in light responsiveness
GmCOMT14	G-box	GCCACGTGGA	958	978	Arabidopsis thaliana	cis-acting regulatory element involved in light responsiveness
GmCOMT14	G-box	CACGTG	960	980	Arabidopsis thaliana	cis-acting regulatory element involved in light responsiveness
GmCOMT14	G-box	CAGACGTGGCA	1630	1650	Nicotiana plumbaginifolia	cis-acting regulatory element involved in light responsiveness
GmCOMT14	G-box	CACGTC	1632	1652	Zea mays	cis-acting regulatory element involved in light responsiveness
GmCOMT14	ABRE	CACGTG	960	980	Arabidopsis thaliana	cis-acting element involved in the abscisic acid responsiveness
GmCOMT14	ABRE	ACGTG	961	981	Arabidopsis thaliana	cis-acting element involved in the abscisic acid responsiveness
GmCOMT14	ABRE	ACGTG	1468	1488	Arabidopsis thaliana	cis-acting element involved in the abscisic acid responsiveness
GmCOMT14	ABRE	ACGTG	1633	1653	Arabidopsis thaliana	cis-acting element involved in the abscisic acid responsiveness
GmCOMT14	AE-box	AGAAACTT	1406	1426	Arabidopsis thaliana	part of a module for light response
GmCOMT14	ARE	AAACCA	843	863	Zea mays	cis-acting regulatory element essential for the anaerobic induction
GmCOMT14	ARE	AAACCA	1588	1608	Zea mays	cis-acting regulatory element essential for the anaerobic induction
GmCOMT14	MRE	AACCTAA	165	185	Petroselinum crispum	MYB binding site involved in light responsiveness
GmCOMT14	MRE	AACCTAA	253	273	Petroselinum crispum	MYB binding site involved in light responsiveness
GmCOMT14	MRE	AACCTAA	290	310	Petroselinum crispum	MYB binding site involved in light responsiveness
GmCOMT14	Box II	CCACGTGGC	958	978	Petroselinum crispum	part of a light responsive element
GmCOMT14	WRE3	CCACCT	1591	1611	Pisum sativum
GmCOMT14	GT1-motif	GGTTAAT	1908	1928	Avena sativa	light responsive element
GmCOMT14	as-1	TGACG	945	965	Arabidopsis thaliana
GmCOMT14	as-1	TGACG	1123	1143	Arabidopsis thaliana
GmCOMT13	Box 4	ATTAAT	973	993	Petroselinum crispum	part of a conserved DNA module involved in light responsiveness
GmCOMT13	Box 4	ATTAAT	1501	1521	Petroselinum crispum	part of a conserved DNA module involved in light responsiveness
GmCOMT13	Box 4	ATTAAT	1589	1609	Petroselinum crispum	part of a conserved DNA module involved in light responsiveness
GmCOMT13	GATA-motif	GATAGGA	1002	1022	Arabidopsis thaliana	part of a light responsive element
GmCOMT13	MYB	TAACCA	841	861	Arabidopsis thaliana
GmCOMT13	MYB	TAACCA	1260	1280	Arabidopsis thaliana
GmCOMT13	MYB	TAACCA	1631	1651	Arabidopsis thaliana
GmCOMT13	MYB	TAACCA	1775	1795	Arabidopsis thaliana
GmCOMT13	ERE	ATTTTAAA	220	240	Nicotiana glutinos
GmCOMT13	ERE	ATTTTAAA	564	584	Nicotiana glutinos
GmCOMT13	ERE	ATTTCATA	583	603	Nicotiana glutinos
GmCOMT13	ERE	ATTTCATA	618	638	Nicotiana glutinos
GmCOMT13	ERE	ATTTTAAA	687	707	Nicotiana glutinos
GmCOMT13	ERE	ATTTTAAA	1043	1063	Nicotiana glutinos
GmCOMT13	ERE	ATTTTAAA	1110	1130	Nicotiana glutinos
GmCOMT13	LAMP-element	CTTTATCA	1367	1387	Pisum sativum	part of a light responsive element
GmCOMT13	MYC	CATTTG	1713	1733	Arabidopsis thaliana
GmCOMT13	MYC	CAATTG	1833	1853	Arabidopsis thaliana
GmCOMT13	MBS	CAACTG	1796	1816	Arabidopsis thaliana	MYB binding site involved in drought-inducibility
GmCOMT13	Myc	TCTCTTA	1167	1187	Arabidopsis thaliana
GmCOMT13	Myc	TCTCTTA	1294	1314	Arabidopsis thaliana
GmCOMT13	Myb	CAACTG	1796	1816	Arabidopsis thaliana
GmCOMT13	CAAT-box	CCAAT	110	130	Arabidopsis thaliana	common cis-acting element in promoter and enhancer regions
GmCOMT13	CAAT-box	CAAT	111	131	Nicotiana glutinosa
GmCOMT13	CAAT-box	CAAAT	192	212	Pisum sativum	common cis-acting element in promoter and enhancer regions
GmCOMT13	CAAT-box	CAAT	240	260	Nicotiana glutinosa
GmCOMT13	CAAT-box	CAAAT	267	287	Pisum sativum	common cis-acting element in promoter and enhancer regions
GmCOMT13	CAAT-box	CAAT	341	361	Nicotiana glutinosa
GmCOMT13	CAAT-box	CAAT	428	448	Nicotiana glutinosa
GmCOMT13	CAAT-box	CAAT	450	470	Nicotiana glutinosa
GmCOMT13	CAAT-box	CAAT	537	557	Nicotiana glutinosa
GmCOMT13	CAAT-box	CCAAT	639	659	Arabidopsis thaliana	common cis-acting element in promoter and enhancer regions
GmCOMT13	CAAT-box	CAAAT	704	724	Pisum sativum	common cis-acting element in promoter and enhancer regions
GmCOMT13	CAAT-box	CAAAT	850	870	Pisum sativum	common cis-acting element in promoter and enhancer regions
GmCOMT13	CAAT-box	CAAT	861	881	Nicotiana glutinosa
GmCOMT13	CAAT-box	CAAT	866	886	Nicotiana glutinosa
GmCOMT13	CAAT-box	CAAT	941	961	Nicotiana glutinosa
GmCOMT13	CAAT-box	CAAT	993	1013	Nicotiana glutinosa
GmCOMT13	CAAT-box	CAAT	1030	1050	Nicotiana glutinosa
GmCOMT13	CAAT-box	CAAT	1094	1114	Nicotiana glutinosa
GmCOMT13	CAAT-box	CAAT	1278	1298	Nicotiana glutinosa
GmCOMT13	CAAT-box	CAAAT	1404	1424	Pisum sativum	common cis-acting element in promoter and enhancer regions
GmCOMT13	CAAT-box	CAAT	1513	1533	Nicotiana glutinosa
GmCOMT13	CAAT-box	CAAAT	1535	1555	Pisum sativum	common cis-acting element in promoter and enhancer regions
GmCOMT13	CAAT-box	CAAAT	1601	1621	Pisum sativum	common cis-acting element in promoter and enhancer regions
GmCOMT13	CAAT-box	CAAT	1628	1648	Nicotiana glutinosa
GmCOMT13	CAAT-box	CAAAT	1714	1734	Pisum sativum	common cis-acting element in promoter and enhancer regions
GmCOMT13	CAAT-box	CAAAT	1765	1785	Pisum sativum	common cis-acting element in promoter and enhancer regions
GmCOMT13	CAAT-box	CAAT	1790	1810	Nicotiana glutinosa
GmCOMT13	CAAT-box	CAAT	1803	1823	Nicotiana glutinosa
GmCOMT13	CAAT-box	CCAAT	1810	1830	Arabidopsis thaliana	common cis-acting element in promoter and enhancer regions
GmCOMT13	CAAT-box	CAAT	1822	1842	Nicotiana glutinosa
GmCOMT13	CAAT-box	CAAT	1833	1853	Nicotiana glutinosa
GmCOMT13	CAAT-box	CAAT	1835	1855	Nicotiana glutinosa
GmCOMT13	CAAT-box	CCAAT	1845	1865	Arabidopsis thaliana	common cis-acting element in promoter and enhancer regions
GmCOMT13	CAAT-box	CCAAT	1938	1958	Arabidopsis thaliana	common cis-acting element in promoter and enhancer regions
GmCOMT13	CAAT-box	CAAT	1939	1959	Nicotiana glutinosa
GmCOMT13	CAAT-box	CAAAT	1976	1996	Pisum sativum	common cis-acting element in promoter and enhancer regions
GmCOMT13	CAAT-box	CAAT	1994	2014	Nicotiana glutinosa
GmCOMT13	WUN-motif	AAATTTCCT	1405	1425	Brassica oleracea	wound-responsive element
GmCOMT13	STRE	AGGGG	1758	1778	Arabidopsis thaliana
GmCOMT13	GT1-motif	GGTTAA	840	860	Arabidopsis thaliana	light responsive element
GmCOMT13	ARE	AAACCA	1522	1542	Zea mays	cis-acting regulatory element essential for the anaerobic induction
GmCOMT13	ARE	AAACCA	1671	1691	Zea mays	cis-acting regulatory element essential for the anaerobic induction
GmCOMT13	ARE	AAACCA	1812	1832	Zea mays	cis-acting regulatory element essential for the anaerobic induction
GmCOMT13	AE-box	AGAAACAA	1147	1167	Arabidopsis thaliana	part of a module for light response
GmCOMT15	TCT-motif	TCTTAC	245	265	Arabidopsis thaliana	part of a light responsive element
GmCOMT15	TCT-motif	TCTTAC	901	921	Arabidopsis thaliana	part of a light responsive element
GmCOMT15	W box	TTGACC	1589	1609	Arabidopsis thaliana
GmCOMT15	MBS	CAACTG	844	864	Arabidopsis thaliana	MYB binding site involved in drought-inducibility
GmCOMT15	AT1-motif	AATTATTTTTTATT	1078	1098	Solanum tuberosum	part of a light responsive module
GmCOMT15	ATCT-motif	AATCTAATCC	933	953	Pisum sativum	part of a conserved DNA module involved in light responsiveness
GmCOMT15	Myb	CAACTG	844	864	Arabidopsis thaliana
GmCOMT15	CGTCA-motif	CGTCA	811	831	Hordeum vulgare	cis-acting regulatory element involved in the MeJA-responsiveness
GmCOMT15	CGTCA-motif	CGTCA	1855	1875	Hordeum vulgare	cis-acting regulatory element involved in the MeJA-responsiveness
GmCOMT15	ERE	ATTTTAAA	267	287	Nicotiana glutinos
GmCOMT15	ERE	ATTTTAAA	859	879	Nicotiana glutinos
GmCOMT15	ERE	ATTTTAAA	1280	1300	Nicotiana glutinos
GmCOMT15	MYB	TAACCA	147	167	Arabidopsis thaliana
GmCOMT15	MYB	CAACCA	575	595	Arabidopsis thaliana
GmCOMT15	MYB	TAACCA	712	732	Arabidopsis thaliana
GmCOMT15	MYB	CAACCA	1594	1614	Arabidopsis thaliana
GmCOMT15	MYB	TAACCA	1950	1970	Arabidopsis thaliana
GmCOMT15	GA-motif	ATAGATAA	1568	1588	Arabidopsis thaliana	part of a light responsive element
GmCOMT15	GATA-motif	AAGGATAAGG	1166	1186	Solanum tuberosum	part of a light responsive element
GmCOMT15	GATA-motif	GATAGGA	1190	1210	Arabidopsis thaliana	part of a light responsive element
GmCOMT15	Box 4	ATTAAT	408	428	Petroselinum crispum	part of a conserved DNA module involved in light responsiveness
GmCOMT15	Box 4	ATTAAT	1106	1126	Petroselinum crispum	part of a conserved DNA module involved in light responsiveness
GmCOMT15	Box 4	ATTAAT	1355	1375	Petroselinum crispum	part of a conserved DNA module involved in light responsiveness
GmCOMT15	Box 4	ATTAAT	1427	1447	Petroselinum crispum	part of a conserved DNA module involved in light responsiveness
GmCOMT15	Box 4	ATTAAT	1829	1849	Petroselinum crispum	part of a conserved DNA module involved in light responsiveness
GmCOMT15	Sp1	GGGCGG	12	32	Oryza sativa	light responsive element
GmCOMT15	circadian	CAAAGATATC	1793	1813	Lycopersicon esculentum	cis-acting regulatory element involved in circadian control
GmCOMT15	G-Box	CACGTT	118	138	Pisum sativum	cis-acting regulatory element involved in light responsiveness
GmCOMT15	MYC	CATTTG	23	43	Arabidopsis thaliana
GmCOMT15	MYC	CATGTG	69	89	Arabidopsis thaliana
GmCOMT15	MYC	CATGTG	354	374	Arabidopsis thaliana
GmCOMT15	MYC	CATGTG	539	559	Arabidopsis thaliana
GmCOMT15	MYC	CATTTG	1616	1636	Arabidopsis thaliana
GmCOMT15	as-1	TGACG	811	831	Arabidopsis thaliana
GmCOMT15	as-1	TGACG	1855	1875	Arabidopsis thaliana
GmCOMT15	GT1-motif	GGTTAAT	145	165	Avena sativa	light responsive element
GmCOMT15	GT1-motif	GGTTAA	146	166	Arabidopsis thaliana	light responsive element
GmCOMT15	GT1-motif	GGTTAAT	1846	1866	Avena sativa	light responsive element
GmCOMT15	AE-box	AGAAACTT	1384	1404	Arabidopsis thaliana	part of a module for light response
GmCOMT15	ABRE	ACGTG	119	139	Arabidopsis thaliana	cis-acting element involved in the abscisic acid responsiveness
GmCOMT15	CAAT-box	CAAAT	23	43	Pisum sativum	common cis-acting element in promoter and enhancer regions
GmCOMT15	CAAT-box	CAAAT	133	153	Pisum sativum	common cis-acting element in promoter and enhancer regions
GmCOMT15	CAAT-box	CAAAT	162	182	Pisum sativum	common cis-acting element in promoter and enhancer regions
GmCOMT15	CAAT-box	CAAT	177	197	Nicotiana glutinosa
GmCOMT15	CAAT-box	CAAAT	212	232	Pisum sativum	common cis-acting element in promoter and enhancer regions
GmCOMT15	CAAT-box	CAAAT	235	255	Pisum sativum	common cis-acting element in promoter and enhancer regions
GmCOMT15	CAAT-box	CAAT	274	294	Nicotiana glutinosa
GmCOMT15	CAAT-box	CAAT	320	340	Nicotiana glutinosa
GmCOMT15	CAAT-box	CAAAT	499	519	Pisum sativum	common cis-acting element in promoter and enhancer regions
GmCOMT15	CAAT-box	CAAAT	517	537	Pisum sativum	common cis-acting element in promoter and enhancer regions
GmCOMT15	CAAT-box	CAAAT	552	572	Pisum sativum	common cis-acting element in promoter and enhancer regions
GmCOMT15	CAAT-box	CAAT	568	588	Nicotiana glutinosa
GmCOMT15	CAAT-box	CAAAT	590	610	Pisum sativum	common cis-acting element in promoter and enhancer regions
GmCOMT15	CAAT-box	CAAT	871	891	Nicotiana glutinosa
GmCOMT15	CAAT-box	CAAT	914	934	Nicotiana glutinosa
GmCOMT15	CAAT-box	CAAT	946	966	Nicotiana glutinosa
GmCOMT15	CAAT-box	CAAAT	1044	1064	Pisum sativum	common cis-acting element in promoter and enhancer regions
GmCOMT15	CAAT-box	CCAAT	1060	1080	Arabidopsis thaliana	common cis-acting element in promoter and enhancer regions
GmCOMT15	CAAT-box	CAAT	1113	1133	Nicotiana glutinosa
GmCOMT15	CAAT-box	CAAT	1143	1163	Nicotiana glutinosa
GmCOMT15	CAAT-box	CAAAT	1156	1176	Pisum sativum	common cis-acting element in promoter and enhancer regions
GmCOMT15	CAAT-box	CAAAT	1275	1295	Pisum sativum	common cis-acting element in promoter and enhancer regions
GmCOMT15	CAAT-box	CAAT	1310	1330	Nicotiana glutinosa
GmCOMT15	CAAT-box	CCAAT	1347	1367	Arabidopsis thaliana	common cis-acting element in promoter and enhancer regions
GmCOMT15	CAAT-box	CAAAT	1431	1451	Pisum sativum	common cis-acting element in promoter and enhancer regions
GmCOMT15	CAAT-box	CAAT	1465	1485	Nicotiana glutinosa
GmCOMT15	CAAT-box	CAAAT	1522	1542	Pisum sativum	common cis-acting element in promoter and enhancer regions
GmCOMT15	CAAT-box	CAAT	1588	1608	Nicotiana glutinosa
GmCOMT15	CAAT-box	CAAT	1611	1631	Nicotiana glutinosa
GmCOMT15	CAAT-box	CAAAT	1616	1636	Pisum sativum	common cis-acting element in promoter and enhancer regions
GmCOMT15	CAAT-box	CAAAT	1680	1700	Pisum sativum	common cis-acting element in promoter and enhancer regions
GmCOMT15	CAAT-box	CAAT	1697	1717	Nicotiana glutinosa
GmCOMT15	CAAT-box	CAAT	1757	1777	Nicotiana glutinosa
GmCOMT15	CAAT-box	CAAT	1860	1880	Nicotiana glutinosa
GmCOMT15	CAAT-box	CAAT	1902	1922	Nicotiana glutinosa
GmCOMT15	CAAT-box	CCAAT	1943	1963	Arabidopsis thaliana	common cis-acting element in promoter and enhancer regions
GmCOMT15	CAAT-box	CAAT	1944	1964	Nicotiana glutinosa
GmCOMT15	CAAT-box	CAAAT	1981	2001	Pisum sativum	common cis-acting element in promoter and enhancer regions
GmCOMT15	CAAT-box	CAAT	1990	2010	Nicotiana glutinosa
GmCOMT15	chs-CMA1a	TTACTTAA	108	128	Daucus carota	part of a light responsive element
GmCOMT15	TGACG-motif	TGACG	811	831	Hordeum vulgare	cis-acting regulatory element involved in the MeJA-responsiveness
GmCOMT15	TGACG-motif	TGACG	1855	1875	Hordeum vulgare	cis-acting regulatory element involved in the MeJA-responsiveness
GmCOMT15	STRE	AGGGG	1377	1397	Arabidopsis thaliana
GmCOMT15	STRE	AGGGG	1843	1863	Arabidopsis thaliana
GmCOMT15	WUN-motif	AAATTTCTT	1157	1177	Nicotiana glutinosa
GmCOMT43	Myc	TCTCTTA	1565	1585	Arabidopsis thaliana
GmCOMT43	CGTCA-motif	CGTCA	358	378	Hordeum vulgare	cis-acting regulatory element involved in the MeJA-responsiveness
GmCOMT43	CGTCA-motif	CGTCA	1517	1537	Hordeum vulgare	cis-acting regulatory element involved in the MeJA-responsiveness
GmCOMT43	TCT-motif	TCTTAC	619	639	Arabidopsis thaliana	part of a light responsive element
GmCOMT43	TCT-motif	TCTTAC	759	779	Arabidopsis thaliana	part of a light responsive element
GmCOMT43	RY-element	CATGCATG	1209	1229	Helianthus annuus	cis-acting regulatory element involved in seed-specific regulation
GmCOMT43	MSA-like	(T/C)C(T/C)AACGG(T/C)(T/C)A	380	400	Catharanthus roseus	cis-acting element involved in cell cycle regulation
GmCOMT43	GCN4_motif	TGAGTCA	1547	1567	Oryza sativa	cis-regulatory element involved in endosperm expression
GmCOMT43	Box 4	ATTAAT	151	171	Petroselinum crispum	part of a conserved DNA module involved in light responsiveness
GmCOMT43	Box 4	ATTAAT	567	587	Petroselinum crispum	part of a conserved DNA module involved in light responsiveness
GmCOMT43	Box 4	ATTAAT	634	654	Petroselinum crispum	part of a conserved DNA module involved in light responsiveness
GmCOMT43	Box 4	ATTAAT	638	658	Petroselinum crispum	part of a conserved DNA module involved in light responsiveness
GmCOMT43	Box 4	ATTAAT	826	846	Petroselinum crispum	part of a conserved DNA module involved in light responsiveness
GmCOMT43	Box 4	ATTAAT	939	959	Petroselinum crispum	part of a conserved DNA module involved in light responsiveness
GmCOMT43	Box 4	ATTAAT	943	963	Petroselinum crispum	part of a conserved DNA module involved in light responsiveness
GmCOMT43	Box 4	ATTAAT	994	1014	Petroselinum crispum	part of a conserved DNA module involved in light responsiveness
GmCOMT43	Box 4	ATTAAT	1148	1168	Petroselinum crispum	part of a conserved DNA module involved in light responsiveness
GmCOMT43	Box 4	ATTAAT	1778	1798	Petroselinum crispum	part of a conserved DNA module involved in light responsiveness
GmCOMT43	Box 4	ATTAAT	1813	1833	Petroselinum crispum	part of a conserved DNA module involved in light responsiveness
GmCOMT43	Box 4	ATTAAT	1833	1853	Petroselinum crispum	part of a conserved DNA module involved in light responsiveness
GmCOMT43	ERE	ATTTTAAA	122	142	Nicotiana glutinos
GmCOMT43	MYB	CAACAG	732	752	Arabidopsis thaliana
GmCOMT43	MYB	TAACCA	1247	1267	Arabidopsis thaliana
GmCOMT43	AE-box	AGAAACAA	115	135	Arabidopsis thaliana	part of a module for light response
GmCOMT43	AE-box	AGAAACTT	910	930	Arabidopsis thaliana	part of a module for light response
GmCOMT43	ABRE	ACGTG	1630	1650	Arabidopsis thaliana	cis-acting element involved in the abscisic acid responsiveness
GmCOMT43	WRE3	CCACCT	645	665	Pisum sativum
GmCOMT43	as-1	TGACG	358	378	Arabidopsis thaliana
GmCOMT43	as-1	TGACG	1517	1537	Arabidopsis thaliana
GmCOMT43	STRE	AGGGG	1912	1932	Arabidopsis thaliana
GmCOMT43	WUN-motif	AAATTTCTT	1173	1193	Nicotiana glutinosa
GmCOMT43	WUN-motif	AAATTTCTT	1286	1306	Nicotiana glutinosa
GmCOMT43	P-box	CCTTTTG	1318	1338	Oryza sativa	gibberellin-responsive element
GmCOMT43	P-box	CCTTTTG	1343	1363	Oryza sativa	gibberellin-responsive element
GmCOMT43	TGACG-motif	TGACG	358	378	Hordeum vulgare	cis-acting regulatory element involved in the MeJA-responsiveness
GmCOMT43	TGACG-motif	TGACG	1517	1537	Hordeum vulgare	cis-acting regulatory element involved in the MeJA-responsiveness
GmCOMT43	G-box	TACGTG	1629	1649	Arabidopsis thaliana	cis-acting regulatory element involved in light responsiveness
GmCOMT43	CAAT-box	CAAT	157	177	Nicotiana glutinosa
GmCOMT43	CAAT-box	CAAT	277	297	Nicotiana glutinosa
GmCOMT43	CAAT-box	CAAAT	307	327	Pisum sativum	common cis-acting element in promoter and enhancer regions
GmCOMT43	CAAT-box	CAAAT	347	367	Pisum sativum	common cis-acting element in promoter and enhancer regions
GmCOMT43	CAAT-box	CAAT	361	381	Nicotiana glutinosa
GmCOMT43	CAAT-box	CAAAT	372	392	Pisum sativum	common cis-acting element in promoter and enhancer regions
GmCOMT43	CAAT-box	CAAT	446	466	Nicotiana glutinosa
GmCOMT43	CAAT-box	CAAT	499	519	Nicotiana glutinosa
GmCOMT43	CAAT-box	CAAT	503	523	Nicotiana glutinosa
GmCOMT43	CAAT-box	CAAT	543	563	Nicotiana glutinosa
GmCOMT43	CAAT-box	CAAT	551	571	Nicotiana glutinosa
GmCOMT43	CAAT-box	CAAT	557	577	Nicotiana glutinosa
GmCOMT43	CAAT-box	CAAT	655	675	Nicotiana glutinosa
GmCOMT43	CAAT-box	CAAT	751	771	Nicotiana glutinosa
GmCOMT43	CAAT-box	CAAT	814	834	Nicotiana glutinosa
GmCOMT43	CAAT-box	CAAT	924	944	Nicotiana glutinosa
GmCOMT43	CAAT-box	CAAT	928	948	Nicotiana glutinosa
GmCOMT43	CAAT-box	CAAT	961	981	Nicotiana glutinosa
GmCOMT43	CAAT-box	CAAT	998	1018	Nicotiana glutinosa
GmCOMT43	CAAT-box	CAAT	1021	1041	Nicotiana glutinosa
GmCOMT43	CAAT-box	CAAT	1119	1139	Nicotiana glutinosa
GmCOMT43	CAAT-box	CAAT	1129	1149	Nicotiana glutinosa
GmCOMT43	CAAT-box	CAAT	1152	1172	Nicotiana glutinosa
GmCOMT43	CAAT-box	CAAT	1303	1323	Nicotiana glutinosa
GmCOMT43	CAAT-box	CAAAT	1367	1387	Pisum sativum	common cis-acting element in promoter and enhancer regions
GmCOMT43	CAAT-box	CAAAT	1390	1410	Pisum sativum	common cis-acting element in promoter and enhancer regions
GmCOMT43	CAAT-box	CAAT	1408	1428	Nicotiana glutinosa
GmCOMT43	CAAT-box	CCAAT	1421	1441	Arabidopsis thaliana	common cis-acting element in promoter and enhancer regions
GmCOMT43	CAAT-box	CAAT	1422	1442	Nicotiana glutinosa
GmCOMT43	CAAT-box	CAAT	1437	1457	Nicotiana glutinosa
GmCOMT43	CAAT-box	CCAAT	1445	1465	Arabidopsis thaliana	common cis-acting element in promoter and enhancer regions
GmCOMT43	CAAT-box	CAAT	1446	1466	Nicotiana glutinosa
GmCOMT43	CAAT-box	CAAT	1457	1477	Nicotiana glutinosa
GmCOMT43	CAAT-box	CAAT	1524	1544	Nicotiana glutinosa
GmCOMT43	CAAT-box	CAAAT	1588	1608	Pisum sativum	common cis-acting element in promoter and enhancer regions
GmCOMT43	CAAT-box	CAAT	1624	1644	Nicotiana glutinosa
GmCOMT43	CAAT-box	CAAT	1837	1857	Nicotiana glutinosa
GmCOMT43	CAAT-box	CAAAT	1879	1899	Pisum sativum	common cis-acting element in promoter and enhancer regions
GmCOMT43	CAAT-box	CAAAT	1954	1974	Pisum sativum	common cis-acting element in promoter and enhancer regions
GmCOMT12	ARE	AAACCA	974	994	Zea mays	cis-acting regulatory element essential for the anaerobic induction
GmCOMT12	ARE	AAACCA	997	1017	Zea mays	cis-acting regulatory element essential for the anaerobic induction
GmCOMT12	ARE	AAACCA	1346	1366	Zea mays	cis-acting regulatory element essential for the anaerobic induction
GmCOMT12	ARE	AAACCA	1693	1713	Zea mays	cis-acting regulatory element essential for the anaerobic induction
GmCOMT12	ARE	AAACCA	1725	1745	Zea mays	cis-acting regulatory element essential for the anaerobic induction
GmCOMT12	ARE	AAACCA	1929	1949	Zea mays	cis-acting regulatory element essential for the anaerobic induction
GmCOMT12	as-1	TGACG	111	131	Arabidopsis thaliana
GmCOMT12	as-1	TGACG	824	844	Arabidopsis thaliana
GmCOMT12	as-1	TGACG	1646	1666	Arabidopsis thaliana
GmCOMT12	AE-box	AGAAACAA	452	472	Arabidopsis thaliana	part of a module for light response
GmCOMT12	AE-box	AGAAACAA	1421	1441	Arabidopsis thaliana	part of a module for light response
GmCOMT12	ABRE	ACGTG	9	29	Arabidopsis thaliana	cis-acting element involved in the abscisic acid responsiveness
GmCOMT12	ABRE	ACGTG	113	133	Arabidopsis thaliana	cis-acting element involved in the abscisic acid responsiveness
GmCOMT12	ABRE	GCAACGTGTC	711	731	Hordeum vulgare	cis-acting element involved in the abscisic acid responsiveness
GmCOMT12	ABRE	ACGTG	714	734	Arabidopsis thaliana	cis-acting element involved in the abscisic acid responsiveness
GmCOMT12	ABRE	CACGTG	758	778	Arabidopsis thaliana	cis-acting element involved in the abscisic acid responsiveness
GmCOMT12	ABRE	ACGTG	759	779	Arabidopsis thaliana	cis-acting element involved in the abscisic acid responsiveness
GmCOMT12	ABRE	ACGTG	826	846	Arabidopsis thaliana	cis-acting element involved in the abscisic acid responsiveness
GmCOMT12	chs-CMA1a	TTACTTAA	1973	1993	Daucus carota	part of a light responsive element
GmCOMT12	TGACG-motif	TGACG	111	131	Hordeum vulgare	cis-acting regulatory element involved in the MeJA-responsiveness
GmCOMT12	TGACG-motif	TGACG	824	844	Hordeum vulgare	cis-acting regulatory element involved in the MeJA-responsiveness
GmCOMT12	TGACG-motif	TGACG	1646	1666	Hordeum vulgare	cis-acting regulatory element involved in the MeJA-responsiveness
GmCOMT12	G-box	CACGTC	112	132	Zea mays	cis-acting regulatory element involved in light responsiveness
GmCOMT12	G-box	CACGTG	758	778	Arabidopsis thaliana	cis-acting regulatory element involved in light responsiveness
GmCOMT12	G-box	CACGTC	825	845	Zea mays	cis-acting regulatory element involved in light responsiveness
GmCOMT12	3-AF1 binding site	TAAGAGAGGAA	1164	1184	Solanum tuberosum	light responsive element
GmCOMT12	CAAT-box	CAAAT	-1	19	Pisum sativum	common cis-acting element in promoter and enhancer regions
GmCOMT12	CAAT-box	CAAT	22	42	Nicotiana glutinosa
GmCOMT12	CAAT-box	CAAAT	147	167	Pisum sativum	common cis-acting element in promoter and enhancer regions
GmCOMT12	CAAT-box	CAAAT	285	305	Pisum sativum	common cis-acting element in promoter and enhancer regions
GmCOMT12	CAAT-box	CAAAT	290	310	Pisum sativum	common cis-acting element in promoter and enhancer regions
GmCOMT12	CAAT-box	CAAT	323	343	Nicotiana glutinosa
GmCOMT12	CAAT-box	CCAAT	359	379	Arabidopsis thaliana	common cis-acting element in promoter and enhancer regions
GmCOMT12	CAAT-box	CAAT	360	380	Nicotiana glutinosa
GmCOMT12	CAAT-box	CAAAT	397	417	Pisum sativum	common cis-acting element in promoter and enhancer regions
GmCOMT12	CAAT-box	CAAT	413	433	Nicotiana glutinosa
GmCOMT12	CAAT-box	CAAT	613	633	Nicotiana glutinosa
GmCOMT12	CAAT-box	CCAAT	704	724	Arabidopsis thaliana	common cis-acting element in promoter and enhancer regions
GmCOMT12	CAAT-box	CAAT	727	747	Nicotiana glutinosa
GmCOMT12	CAAT-box	TGCCAAC	738	758	Petunia hybrida	common cis-acting element in promoter and enhancer regions
GmCOMT12	CAAT-box	CAAT	831	851	Nicotiana glutinosa
GmCOMT12	CAAT-box	CAAT	937	957	Nicotiana glutinosa
GmCOMT12	CAAT-box	CAAAT	946	966	Pisum sativum	common cis-acting element in promoter and enhancer regions
GmCOMT12	CAAT-box	CAAT	965	985	Nicotiana glutinosa
GmCOMT12	CAAT-box	CCAAT	972	992	Arabidopsis thaliana	common cis-acting element in promoter and enhancer regions
GmCOMT12	CAAT-box	CCAAT	995	1015	Arabidopsis thaliana	common cis-acting element in promoter and enhancer regions
GmCOMT12	CAAT-box	CAAAT	1328	1348	Pisum sativum	common cis-acting element in promoter and enhancer regions
GmCOMT12	CAAT-box	CCAAT	1339	1359	Arabidopsis thaliana	common cis-acting element in promoter and enhancer regions
GmCOMT12	CAAT-box	CAAT	1356	1376	Nicotiana glutinosa
GmCOMT12	CAAT-box	CAAT	1361	1381	Nicotiana glutinosa
GmCOMT12	CAAT-box	CAAAT	1462	1482	Pisum sativum	common cis-acting element in promoter and enhancer regions
GmCOMT12	CAAT-box	CAAAT	1587	1607	Pisum sativum	common cis-acting element in promoter and enhancer regions
GmCOMT12	CAAT-box	CCAAT	1723	1743	Arabidopsis thaliana	common cis-acting element in promoter and enhancer regions
GmCOMT12	CAAT-box	CAAT	1744	1764	Nicotiana glutinosa
GmCOMT12	CAAT-box	CAAT	1778	1798	Nicotiana glutinosa
GmCOMT12	CAAT-box	CAAAT	1849	1869	Pisum sativum	common cis-acting element in promoter and enhancer regions
GmCOMT12	CAAT-box	CAAAT	1852	1872	Pisum sativum	common cis-acting element in promoter and enhancer regions
GmCOMT12	CAAT-box	CAAT	1858	1878	Nicotiana glutinosa
GmCOMT12	CAAT-box	CAAT	1862	1882	Nicotiana glutinosa
GmCOMT12	CAAT-box	CAAT	1888	1908	Nicotiana glutinosa
GmCOMT12	CAAT-box	CAAT	1892	1912	Nicotiana glutinosa
GmCOMT12	CAAT-box	CAAAT	1937	1957	Pisum sativum	common cis-acting element in promoter and enhancer regions
GmCOMT12	CAAT-box	CAAAT	1961	1981	Pisum sativum	common cis-acting element in promoter and enhancer regions
GmCOMT12	WUN-motif	AAATTACT	1239	1259	Nicotiana glutinosa
GmCOMT12	WUN-motif	AAATTTCTT	1609	1629	Nicotiana glutinosa
GmCOMT12	STRE	AGGGG	1805	1825	Arabidopsis thaliana
GmCOMT12	TC-rich repeats	ATTCTCTAAC	388	408	Nicotiana tabacum	cis-acting element involved in defense and stress responsiveness
GmCOMT12	O2-site	GTTGACGTGA	109	129	Zea mays	cis-acting regulatory element involved in zein metabolism regulation
GmCOMT12	TCT-motif	TCTTAC	984	1004	Arabidopsis thaliana	part of a light responsive element
GmCOMT12	Myb	TAACTG	1759	1779	Arabidopsis thaliana
GmCOMT12	Myb	TAACTG	1823	1843	Arabidopsis thaliana
GmCOMT12	CGTCA-motif	CGTCA	111	131	Hordeum vulgare	cis-acting regulatory element involved in the MeJA-responsiveness
GmCOMT12	CGTCA-motif	CGTCA	824	844	Hordeum vulgare	cis-acting regulatory element involved in the MeJA-responsiveness
GmCOMT12	CGTCA-motif	CGTCA	1646	1666	Hordeum vulgare	cis-acting regulatory element involved in the MeJA-responsiveness
GmCOMT12	MYB	TAACCA	535	555	Arabidopsis thaliana
GmCOMT12	Box 4	ATTAAT	168	188	Petroselinum crispum	part of a conserved DNA module involved in light responsiveness
GmCOMT12	Box 4	ATTAAT	256	276	Petroselinum crispum	part of a conserved DNA module involved in light responsiveness
GmCOMT12	Box 4	ATTAAT	273	293	Petroselinum crispum	part of a conserved DNA module involved in light responsiveness
GmCOMT12	Box 4	ATTAAT	367	387	Petroselinum crispum	part of a conserved DNA module involved in light responsiveness
GmCOMT12	Box 4	ATTAAT	800	820	Petroselinum crispum	part of a conserved DNA module involved in light responsiveness
GmCOMT12	Box 4	ATTAAT	926	946	Petroselinum crispum	part of a conserved DNA module involved in light responsiveness
GmCOMT12	Box 4	ATTAAT	1272	1292	Petroselinum crispum	part of a conserved DNA module involved in light responsiveness
GmCOMT12	Box 4	ATTAAT	1311	1331	Petroselinum crispum	part of a conserved DNA module involved in light responsiveness
GmCOMT12	Box 4	ATTAAT	1335	1355	Petroselinum crispum	part of a conserved DNA module involved in light responsiveness
GmCOMT12	Box 4	ATTAAT	1490	1510	Petroselinum crispum	part of a conserved DNA module involved in light responsiveness
GmCOMT12	GA-motif	ATAGATAA	1132	1152	Arabidopsis thaliana	part of a light responsive element
GmCOMT12	MYC	CATGTG	539	559	Arabidopsis thaliana
GmCOMT12	MYC	CATTTG	1937	1957	Arabidopsis thaliana
GmCOMT12	ACE	CTAACGTATT	1213	1233	Petroselinum crispum	cis-acting element involved in light responsiveness
GmCOMT12	ACE	CTAACGTATT	1656	1676	Petroselinum crispum	cis-acting element involved in light responsiveness
GmCOMT12	G-Box	CACGTT	9	29	Pisum sativum	cis-acting regulatory element involved in light responsiveness
GmCOMT12	G-Box	CACGTT	713	733	Pisum sativum	cis-acting regulatory element involved in light responsiveness
GmCOMT12	G-Box	CACGTG	758	778	Pisum sativum	cis-acting regulatory element involved in light responsiveness
GmCOMT11	ARE	AAACCA	658	678	Zea mays	cis-acting regulatory element essential for the anaerobic induction
GmCOMT11	ARE	AAACCA	987	1007	Zea mays	cis-acting regulatory element essential for the anaerobic induction
GmCOMT11	ARE	AAACCA	1356	1376	Zea mays	cis-acting regulatory element essential for the anaerobic induction
GmCOMT11	ARE	AAACCA	1693	1713	Zea mays	cis-acting regulatory element essential for the anaerobic induction
GmCOMT11	ARE	AAACCA	1929	1949	Zea mays	cis-acting regulatory element essential for the anaerobic induction
GmCOMT11	GT1-motif	GGTTAA	260	280	Arabidopsis thaliana	light responsive element
GmCOMT11	as-1	TGACG	270	290	Arabidopsis thaliana
GmCOMT11	ABRE	ACGTG	272	292	Arabidopsis thaliana	cis-acting element involved in the abscisic acid responsiveness
GmCOMT11	AE-box	AGAAACTT	389	409	Arabidopsis thaliana	part of a module for light response
GmCOMT11	TGACG-motif	TGACG	270	290	Hordeum vulgare	cis-acting regulatory element involved in the MeJA-responsiveness
GmCOMT11	chs-CMA1a	TTACTTAA	1973	1993	Daucus carota	part of a light responsive element
GmCOMT11	CAAT-box	CAAT	21	41	Nicotiana glutinosa
GmCOMT11	CAAT-box	CAAT	112	132	Nicotiana glutinosa
GmCOMT11	CAAT-box	CAAT	141	161	Nicotiana glutinosa
GmCOMT11	CAAT-box	CAAT	159	179	Nicotiana glutinosa
GmCOMT11	CAAT-box	CAAT	221	241	Nicotiana glutinosa
GmCOMT11	CAAT-box	CAAT	249	269	Nicotiana glutinosa
GmCOMT11	CAAT-box	CAAT	255	275	Nicotiana glutinosa
GmCOMT11	CAAT-box	CAAT	277	297	Nicotiana glutinosa
GmCOMT11	CAAT-box	CAAT	644	664	Nicotiana glutinosa
GmCOMT11	CAAT-box	CCAAT	656	676	Arabidopsis thaliana	common cis-acting element in promoter and enhancer regions
GmCOMT11	CAAT-box	CAAT	929	949	Nicotiana glutinosa
GmCOMT11	CAAT-box	CAAAT	931	951	Pisum sativum	common cis-acting element in promoter and enhancer regions
GmCOMT11	CAAT-box	CAAT	950	970	Nicotiana glutinosa
GmCOMT11	CAAT-box	CAAT	978	998	Nicotiana glutinosa
GmCOMT11	CAAT-box	CCAAT	985	1005	Arabidopsis thaliana	common cis-acting element in promoter and enhancer regions
GmCOMT11	CAAT-box	CAAAT	1338	1358	Pisum sativum	common cis-acting element in promoter and enhancer regions
GmCOMT11	CAAT-box	CAAT	1366	1386	Nicotiana glutinosa
GmCOMT11	CAAT-box	CAAT	1371	1391	Nicotiana glutinosa
GmCOMT11	CAAT-box	CAAT	1778	1798	Nicotiana glutinosa
GmCOMT11	CAAT-box	CAAAT	1812	1832	Pisum sativum	common cis-acting element in promoter and enhancer regions
GmCOMT11	CAAT-box	CAAAT	1849	1869	Pisum sativum	common cis-acting element in promoter and enhancer regions
GmCOMT11	CAAT-box	CAAAT	1852	1872	Pisum sativum	common cis-acting element in promoter and enhancer regions
GmCOMT11	CAAT-box	CAAT	1858	1878	Nicotiana glutinosa
GmCOMT11	CAAT-box	CAAT	1862	1882	Nicotiana glutinosa
GmCOMT11	CAAT-box	CAAT	1888	1908	Nicotiana glutinosa
GmCOMT11	CAAT-box	CAAT	1892	1912	Nicotiana glutinosa
GmCOMT11	CAAT-box	CAAAT	1937	1957	Pisum sativum	common cis-acting element in promoter and enhancer regions
GmCOMT11	CAAT-box	CAAAT	1961	1981	Pisum sativum	common cis-acting element in promoter and enhancer regions
GmCOMT11	I-box	gGATAAGGTG	303	323	Zea mays	part of a light responsive element
GmCOMT11	I-box	AAGATAAGGCT	1194	1214	Gossypium hirsutum	part of a light responsive element
GmCOMT11	G-box	CACGTC	271	291	Zea mays	cis-acting regulatory element involved in light responsiveness
GmCOMT11	O2-site	GTTGACGTGA	268	288	Zea mays	cis-acting regulatory element involved in zein metabolism regulation
GmCOMT11	TC-rich repeats	GTTTTCTTAC	660	680	Nicotiana tabacum	cis-acting element involved in defense and stress responsiveness
GmCOMT11	STRE	AGGGG	360	380	Arabidopsis thaliana
GmCOMT11	STRE	AGGGG	1805	1825	Arabidopsis thaliana
GmCOMT11	WUN-motif	AAATTACT	1228	1248	Nicotiana glutinosa
GmCOMT11	CGTCA-motif	CGTCA	270	290	Hordeum vulgare	cis-acting regulatory element involved in the MeJA-responsiveness
GmCOMT11	Myb	TAACTG	1759	1779	Arabidopsis thaliana
GmCOMT11	Myb	TAACTG	1823	1843	Arabidopsis thaliana
GmCOMT11	GATA-motif	AAGGATAAGG	688	708	Solanum tuberosum	part of a light responsive element
GmCOMT11	Box 4	ATTAAT	209	229	Petroselinum crispum	part of a conserved DNA module involved in light responsiveness
GmCOMT11	Box 4	ATTAAT	918	938	Petroselinum crispum	part of a conserved DNA module involved in light responsiveness
GmCOMT11	Box 4	ATTAAT	1053	1073	Petroselinum crispum	part of a conserved DNA module involved in light responsiveness
GmCOMT11	Box 4	ATTAAT	1282	1302	Petroselinum crispum	part of a conserved DNA module involved in light responsiveness
GmCOMT11	Box 4	ATTAAT	1490	1510	Petroselinum crispum	part of a conserved DNA module involved in light responsiveness
GmCOMT11	ERE	ATTTTAAA	868	888	Nicotiana glutinos
GmCOMT11	ERE	ATTTTAAA	1212	1232	Nicotiana glutinos
GmCOMT11	MYB	CAACCA	704	724	Arabidopsis thaliana
GmCOMT11	MYC	CATGTG	127	147	Arabidopsis thaliana
GmCOMT11	MYC	CATGTG	619	639	Arabidopsis thaliana
GmCOMT11	MYC	CATGTG	1060	1080	Arabidopsis thaliana
GmCOMT11	MYC	CATTTG	1812	1832	Arabidopsis thaliana
GmCOMT11	MYC	CATTTG	1937	1957	Arabidopsis thaliana
GmCOMT11	GCN4_motif	TGAGTCA	614	634	Oryza sativa	cis-regulatory element involved in endosperm expression
GmCOMT11	ACE	CTAACGTATT	1656	1676	Petroselinum crispum	cis-acting element involved in light responsiveness
GmCOMT11	LAMP-element	CTTTATCA	1467	1487	Pisum sativum	part of a light responsive element
GmCOMT45	LAMP-element	CTTTATCA	1465	1485	Pisum sativum	part of a light responsive element
GmCOMT45	MYC	CATTTG	789	809	Arabidopsis thaliana
GmCOMT45	MYC	CATTTG	1291	1311	Arabidopsis thaliana
GmCOMT45	MYC	CATTTG	1801	1821	Arabidopsis thaliana
GmCOMT45	MYC	CATGTG	1917	1937	Arabidopsis thaliana
GmCOMT45	CCGTCC-box	CCGTCC	928	948	Petroselinum hortense
GmCOMT45	ERE	ATTTTAAA	534	554	Nicotiana glutinos
GmCOMT45	ERE	ATTTTAAA	578	598	Nicotiana glutinos
GmCOMT45	ERE	ATTTTAAA	615	635	Nicotiana glutinos
GmCOMT45	ERE	ATTTTAAA	1593	1613	Nicotiana glutinos
GmCOMT45	ERE	ATTTTAAA	1882	1902	Nicotiana glutinos
GmCOMT45	MYB	CAACAG	7	27	Arabidopsis thaliana
GmCOMT45	MYB	CAACAG	135	155	Arabidopsis thaliana
GmCOMT45	MYB	CAACAG	180	200	Arabidopsis thaliana
GmCOMT45	MYB	CAACCA	223	243	Arabidopsis thaliana
GmCOMT45	MYB	TAACCA	1413	1433	Arabidopsis thaliana
GmCOMT45	MYB	TAACCA	1549	1569	Arabidopsis thaliana
GmCOMT45	MYB	CAACCA	1825	1845	Arabidopsis thaliana
GmCOMT45	GATA-motif	GATAGGA	477	497	Arabidopsis thaliana	part of a light responsive element
GmCOMT45	GATA-motif	AAGGATAAGG	1134	1154	Solanum tuberosum	part of a light responsive element
GmCOMT45	GATA-motif	GATAGGA	1620	1640	Arabidopsis thaliana	part of a light responsive element
GmCOMT45	Box 4	ATTAAT	242	262	Petroselinum crispum	part of a conserved DNA module involved in light responsiveness
GmCOMT45	Box 4	ATTAAT	282	302	Petroselinum crispum	part of a conserved DNA module involved in light responsiveness
GmCOMT45	Box 4	ATTAAT	318	338	Petroselinum crispum	part of a conserved DNA module involved in light responsiveness
GmCOMT45	Box 4	ATTAAT	584	604	Petroselinum crispum	part of a conserved DNA module involved in light responsiveness
GmCOMT45	Box 4	ATTAAT	747	767	Petroselinum crispum	part of a conserved DNA module involved in light responsiveness
GmCOMT45	Box 4	ATTAAT	1846	1866	Petroselinum crispum	part of a conserved DNA module involved in light responsiveness
GmCOMT45	Box 4	ATTAAT	1909	1929	Petroselinum crispum	part of a conserved DNA module involved in light responsiveness
GmCOMT45	GARE-motif	TCTGTTG	6	26	Brassica oleracea	gibberellin-responsive element
GmCOMT45	GARE-motif	TCTGTTG	179	199	Brassica oleracea	gibberellin-responsive element
GmCOMT45	TCA-element	CCATCTTTTT	162	182	Nicotiana tabacum	cis-acting element involved in salicylic acid responsiveness
GmCOMT45	TCA-element	TCAGAAGAGG	1722	1742	Brassica oleracea	cis-acting element involved in salicylic acid responsiveness
GmCOMT45	TCA-element	CCATCTTTTT	1731	1751	Nicotiana tabacum	cis-acting element involved in salicylic acid responsiveness
GmCOMT45	CGTCA-motif	CGTCA	75	95	Hordeum vulgare	cis-acting regulatory element involved in the MeJA-responsiveness
GmCOMT45	Myc	TCTCTTA	1890	1910	Arabidopsis thaliana
GmCOMT45	Myb	TAACTG	269	289	Arabidopsis thaliana
GmCOMT45	Myb	TAACTG	338	358	Arabidopsis thaliana
GmCOMT45	TCT-motif	TCTTAC	1686	1706	Arabidopsis thaliana	part of a light responsive element
GmCOMT45	TC-rich repeats	ATTCTCTAAC	605	625	Nicotiana tabacum	cis-acting element involved in defense and stress responsiveness
GmCOMT45	CAAT-box	CAAT	235	255	Nicotiana glutinosa
GmCOMT45	CAAT-box	CAAAT	299	319	Pisum sativum	common cis-acting element in promoter and enhancer regions
GmCOMT45	CAAT-box	CAAT	327	347	Nicotiana glutinosa
GmCOMT45	CAAT-box	CAAAT	395	415	Pisum sativum	common cis-acting element in promoter and enhancer regions
GmCOMT45	CAAT-box	CAAT	406	426	Nicotiana glutinosa
GmCOMT45	CAAT-box	CAAT	547	567	Nicotiana glutinosa
GmCOMT45	CAAT-box	CAAT	599	619	Nicotiana glutinosa
GmCOMT45	CAAT-box	CAAT	666	686	Nicotiana glutinosa
GmCOMT45	CAAT-box	CAAT	743	763	Nicotiana glutinosa
GmCOMT45	CAAT-box	CAAT	751	771	Nicotiana glutinosa
GmCOMT45	CAAT-box	CAAAT	790	810	Pisum sativum	common cis-acting element in promoter and enhancer regions
GmCOMT45	CAAT-box	CAAT	813	833	Nicotiana glutinosa
GmCOMT45	CAAT-box	CAAT	845	865	Nicotiana glutinosa
GmCOMT45	CAAT-box	CAAT	906	926	Nicotiana glutinosa
GmCOMT45	CAAT-box	CAAAT	968	988	Pisum sativum	common cis-acting element in promoter and enhancer regions
GmCOMT45	CAAT-box	CCAAT	1031	1051	Arabidopsis thaliana	common cis-acting element in promoter and enhancer regions
GmCOMT45	CAAT-box	CAAAT	1058	1078	Pisum sativum	common cis-acting element in promoter and enhancer regions
GmCOMT45	CAAT-box	CCCAATTT	1114	1134	Arabidopsis thaliana	common cis-acting element in promoter and enhancer regions
GmCOMT45	CAAT-box	CCAAT	1116	1136	Arabidopsis thaliana	common cis-acting element in promoter and enhancer regions
GmCOMT45	CAAT-box	CAAT	1123	1143	Nicotiana glutinosa
GmCOMT45	CAAT-box	CAAAT	1151	1171	Pisum sativum	common cis-acting element in promoter and enhancer regions
GmCOMT45	CAAT-box	CAAAT	1291	1311	Pisum sativum	common cis-acting element in promoter and enhancer regions
GmCOMT45	CAAT-box	CAAT	1300	1320	Nicotiana glutinosa
GmCOMT45	CAAT-box	CAAAT	1462	1482	Pisum sativum	common cis-acting element in promoter and enhancer regions
GmCOMT45	CAAT-box	CAAAT	1546	1566	Pisum sativum	common cis-acting element in promoter and enhancer regions
GmCOMT45	CAAT-box	CAAAT	1676	1696	Pisum sativum	common cis-acting element in promoter and enhancer regions
GmCOMT45	CAAT-box	CAAT	1715	1735	Nicotiana glutinosa
GmCOMT45	CAAT-box	CAAT	1756	1776	Nicotiana glutinosa
GmCOMT45	CAAT-box	CAAT	1770	1790	Nicotiana glutinosa
GmCOMT45	CAAT-box	CAAAT	1802	1822	Pisum sativum	common cis-acting element in promoter and enhancer regions
GmCOMT45	CAAT-box	CCAAT	1828	1848	Arabidopsis thaliana	common cis-acting element in promoter and enhancer regions
GmCOMT45	CAAT-box	CAAT	1829	1849	Nicotiana glutinosa
GmCOMT45	CAAT-box	CAAT	1852	1872	Nicotiana glutinosa
GmCOMT45	CAAT-box	CAAAT	1865	1885	Pisum sativum	common cis-acting element in promoter and enhancer regions
GmCOMT45	CAAT-box	CAAT	1957	1977	Nicotiana glutinosa
GmCOMT45	G-box	TACGTG	516	536	Arabidopsis thaliana	cis-acting regulatory element involved in light responsiveness
GmCOMT45	G-box	TACGTG	1425	1445	Arabidopsis thaliana	cis-acting regulatory element involved in light responsiveness
GmCOMT45	3-AF1 binding site	TAAGAGAGGAA	1614	1634	Solanum tuberosum	light responsive element
GmCOMT45	TGACG-motif	TGACG	75	95	Hordeum vulgare	cis-acting regulatory element involved in the MeJA-responsiveness
GmCOMT45	ABRE	CGTACGTGCA	514	534	Hordeum vulgare	cis-acting element involved in the abscisic acid responsiveness
GmCOMT45	ABRE	ACGTG	517	537	Arabidopsis thaliana	cis-acting element involved in the abscisic acid responsiveness
GmCOMT45	ABRE	ACGTG	1425	1445	Arabidopsis thaliana	cis-acting element involved in the abscisic acid responsiveness
GmCOMT45	HD-Zip 3	GTAAT(G/C)ATTAC	824	844	Arabidopsis thaliana	protein binding site
GmCOMT45	TATC-box	TATCCCA	474	494	Oryza sativa	cis-acting element involved in gibberellin-responsiveness
GmCOMT45	as-1	TGACG	75	95	Arabidopsis thaliana
GmCOMT45	CAT-box	GCCACT	131	151	Arabidopsis thaliana	cis-acting regulatory element related to meristem expression
GmCOMT45	CAT-box	GCCACT	371	391	Arabidopsis thaliana	cis-acting regulatory element related to meristem expression
GmCOMT45	CAT-box	GCCACT	437	457	Arabidopsis thaliana	cis-acting regulatory element related to meristem expression
GmCOMT45	ARE	AAACCA	525	545	Zea mays	cis-acting regulatory element essential for the anaerobic induction
GmCOMT45	ARE	AAACCA	863	883	Zea mays	cis-acting regulatory element essential for the anaerobic induction
GmCOMT45	ARE	AAACCA	890	910	Zea mays	cis-acting regulatory element essential for the anaerobic induction
GmCOMT52	GT1-motif	GGTTAA	1335	1355	Arabidopsis thaliana	light responsive element
GmCOMT52	as-1	TGACG	74	94	Arabidopsis thaliana
GmCOMT52	as-1	TGACG	602	622	Arabidopsis thaliana
GmCOMT52	as-1	TGACG	1812	1832	Arabidopsis thaliana
GmCOMT52	ABRE	ACGTG	1093	1113	Arabidopsis thaliana	cis-acting element involved in the abscisic acid responsiveness
GmCOMT52	ABRE	ACGTG	1110	1130	Arabidopsis thaliana	cis-acting element involved in the abscisic acid responsiveness
GmCOMT52	TGACG-motif	TGACG	74	94	Hordeum vulgare	cis-acting regulatory element involved in the MeJA-responsiveness
GmCOMT52	TGACG-motif	TGACG	602	622	Hordeum vulgare	cis-acting regulatory element involved in the MeJA-responsiveness
GmCOMT52	TGACG-motif	TGACG	1812	1832	Hordeum vulgare	cis-acting regulatory element involved in the MeJA-responsiveness
GmCOMT52	CAAT-box	CAAT	65	85	Nicotiana glutinosa
GmCOMT52	CAAT-box	CAAAT	132	152	Pisum sativum	common cis-acting element in promoter and enhancer regions
GmCOMT52	CAAT-box	CAAT	239	259	Nicotiana glutinosa
GmCOMT52	CAAT-box	CAAT	278	298	Nicotiana glutinosa
GmCOMT52	CAAT-box	TGCCAAC	325	345	Petunia hybrida	common cis-acting element in promoter and enhancer regions
GmCOMT52	CAAT-box	CAAAT	345	365	Pisum sativum	common cis-acting element in promoter and enhancer regions
GmCOMT52	CAAT-box	CCAAT	551	571	Arabidopsis thaliana	common cis-acting element in promoter and enhancer regions
GmCOMT52	CAAT-box	CAAT	552	572	Nicotiana glutinosa
GmCOMT52	CAAT-box	CAAT	554	574	Nicotiana glutinosa
GmCOMT52	CAAT-box	CAAT	565	585	Nicotiana glutinosa
GmCOMT52	CAAT-box	CAAT	580	600	Nicotiana glutinosa
GmCOMT52	CAAT-box	CCAAT	587	607	Arabidopsis thaliana	common cis-acting element in promoter and enhancer regions
GmCOMT52	CAAT-box	CAAT	588	608	Nicotiana glutinosa
GmCOMT52	CAAT-box	CAAT	594	614	Nicotiana glutinosa
GmCOMT52	CAAT-box	CAAT	667	687	Nicotiana glutinosa
GmCOMT52	CAAT-box	CCAAT	714	734	Arabidopsis thaliana	common cis-acting element in promoter and enhancer regions
GmCOMT52	CAAT-box	CAAT	715	735	Nicotiana glutinosa
GmCOMT52	CAAT-box	CAAT	719	739	Nicotiana glutinosa
GmCOMT52	CAAT-box	CCAAT	738	758	Arabidopsis thaliana	common cis-acting element in promoter and enhancer regions
GmCOMT52	CAAT-box	CAAT	739	759	Nicotiana glutinosa
GmCOMT52	CAAT-box	CAAAT	751	771	Pisum sativum	common cis-acting element in promoter and enhancer regions
GmCOMT52	CAAT-box	CAAT	764	784	Nicotiana glutinosa
GmCOMT52	CAAT-box	CAAAT	801	821	Pisum sativum	common cis-acting element in promoter and enhancer regions
GmCOMT52	CAAT-box	CAAT	804	824	Nicotiana glutinosa
GmCOMT52	CAAT-box	CAAT	814	834	Nicotiana glutinosa
GmCOMT52	CAAT-box	CAAAT	848	868	Pisum sativum	common cis-acting element in promoter and enhancer regions
GmCOMT52	CAAT-box	CAAT	861	881	Nicotiana glutinosa
GmCOMT52	CAAT-box	CAAAT	934	954	Pisum sativum	common cis-acting element in promoter and enhancer regions
GmCOMT52	CAAT-box	CAAT	944	964	Nicotiana glutinosa
GmCOMT52	CAAT-box	CAAT	1375	1395	Nicotiana glutinosa
GmCOMT52	CAAT-box	CCAAT	1377	1397	Arabidopsis thaliana	common cis-acting element in promoter and enhancer regions
GmCOMT52	CAAT-box	CAAT	1588	1608	Nicotiana glutinosa
GmCOMT52	CAAT-box	CAAT	1594	1614	Nicotiana glutinosa
GmCOMT52	CAAT-box	CAAT	1654	1674	Nicotiana glutinosa
GmCOMT52	CAAT-box	CAAT	1670	1690	Nicotiana glutinosa
GmCOMT52	CAAT-box	CAAAT	1758	1778	Pisum sativum	common cis-acting element in promoter and enhancer regions
GmCOMT52	CAAT-box	CAAT	1802	1822	Nicotiana glutinosa
GmCOMT52	CAAT-box	CAAT	1810	1830	Nicotiana glutinosa
GmCOMT52	CAAT-box	CAAT	1897	1917	Nicotiana glutinosa
GmCOMT52	CAAT-box	CCAAT	1977	1997	Arabidopsis thaliana	common cis-acting element in promoter and enhancer regions
GmCOMT52	CAAT-box	CAAT	1978	1998	Nicotiana glutinosa
GmCOMT52	G-box	TAACACGTAG	1090	1110	Brassica oleracea	cis-acting regulatory element involved in light responsiveness
GmCOMT52	G-box	TACGTG	1093	1113	Arabidopsis thaliana	cis-acting regulatory element involved in light responsiveness
GmCOMT52	TC-rich repeats	GTTTTCTTAC	391	411	Nicotiana tabacum	cis-acting element involved in defense and stress responsiveness
GmCOMT52	STRE	AGGGG	1277	1297	Arabidopsis thaliana
GmCOMT52	STRE	AGGGG	1303	1323	Arabidopsis thaliana
GmCOMT52	WUN-motif	AAATTTCTT	197	217	Nicotiana glutinosa
GmCOMT52	WUN-motif	TTATTACAT	1562	1582	Nicotiana glutinosa
GmCOMT52	TCT-motif	TCTTAC	696	716	Arabidopsis thaliana	part of a light responsive element
GmCOMT52	CGTCA-motif	CGTCA	74	94	Hordeum vulgare	cis-acting regulatory element involved in the MeJA-responsiveness
GmCOMT52	CGTCA-motif	CGTCA	602	622	Hordeum vulgare	cis-acting regulatory element involved in the MeJA-responsiveness
GmCOMT52	CGTCA-motif	CGTCA	1812	1832	Hordeum vulgare	cis-acting regulatory element involved in the MeJA-responsiveness
GmCOMT52	Myb	TAACTG	1410	1430	Arabidopsis thaliana
GmCOMT52	Myc	TCTCTTA	316	336	Arabidopsis thaliana
GmCOMT52	Myc	TCTCTTA	1749	1769	Arabidopsis thaliana
GmCOMT52	Box 4	ATTAAT	514	534	Petroselinum crispum	part of a conserved DNA module involved in light responsiveness
GmCOMT52	Box 4	ATTAAT	784	804	Petroselinum crispum	part of a conserved DNA module involved in light responsiveness
GmCOMT52	Box 4	ATTAAT	863	883	Petroselinum crispum	part of a conserved DNA module involved in light responsiveness
GmCOMT52	Box 4	ATTAAT	1428	1448	Petroselinum crispum	part of a conserved DNA module involved in light responsiveness
GmCOMT52	MYB	CAACCA	1852	1872	Arabidopsis thaliana
GmCOMT52	MYB	TAACCA	1920	1940	Arabidopsis thaliana
GmCOMT52	MYC	CATTTG	131	151	Arabidopsis thaliana
GmCOMT52	MYC	CAATTG	552	572	Arabidopsis thaliana
GmCOMT52	MYC	CATTTG	847	867	Arabidopsis thaliana
GmCOMT52	MYC	CAATTG	1375	1395	Arabidopsis thaliana
GmCOMT52	MYC	CATGTG	1614	1634	Arabidopsis thaliana
GmCOMT52	G-Box	CACGTT	1109	1129	Pisum sativum	cis-acting regulatory element involved in light responsiveness
GmCOMT52	GCN4_motif	TGAGTCA	1479	1499	Oryza sativa	cis-regulatory element involved in endosperm expression
GmCOMT51	G-Box	CACGTT	82	102	Pisum sativum	cis-acting regulatory element involved in light responsiveness
GmCOMT51	GCN4_motif	TGAGTCA	776	796	Oryza sativa	cis-regulatory element involved in endosperm expression
GmCOMT51	Gap-box	CAAATGAA(A/G)A	355	375	Arabidopsis thaliana	part of a light responsive element
GmCOMT51	MYC	CATTTG	359	379	Arabidopsis thaliana
GmCOMT51	MYC	CATTTG	893	913	Arabidopsis thaliana
GmCOMT51	MYC	CATGTG	1011	1031	Arabidopsis thaliana
GmCOMT51	MYC	CATTTG	1088	1108	Arabidopsis thaliana
GmCOMT51	MYC	CATGTG	1842	1862	Arabidopsis thaliana
GmCOMT51	CCGTCC-box	CCGTCC	1603	1623	Petroselinum hortense
GmCOMT51	Box 4	ATTAAT	175	195	Petroselinum crispum	part of a conserved DNA module involved in light responsiveness
GmCOMT51	Box 4	ATTAAT	1042	1062	Petroselinum crispum	part of a conserved DNA module involved in light responsiveness
GmCOMT51	Box 4	ATTAAT	1582	1602	Petroselinum crispum	part of a conserved DNA module involved in light responsiveness
GmCOMT51	Box 4	ATTAAT	1765	1785	Petroselinum crispum	part of a conserved DNA module involved in light responsiveness
GmCOMT51	MYB	TAACCA	963	983	Arabidopsis thaliana
GmCOMT51	MYB	TAACCA	1801	1821	Arabidopsis thaliana
GmCOMT51	MYB	CAACCA	1885	1905	Arabidopsis thaliana
GmCOMT51	TCA-element	CCATCTTTTT	587	607	Nicotiana tabacum	cis-acting element involved in salicylic acid responsiveness
GmCOMT51	W box	TTGACC	1433	1453	Arabidopsis thaliana
GmCOMT51	TCT-motif	TCTTAC	63	83	Arabidopsis thaliana	part of a light responsive element
GmCOMT51	TCA	TCATCTTCAT	1408	1428	Pisum sativum
GmCOMT51	O2-site	GATGACATGG	670	690	Zea mays	cis-acting regulatory element involved in zein metabolism regulation
GmCOMT51	CAAT-box	CAAT	173	193	Nicotiana glutinosa
GmCOMT51	CAAT-box	CCAAT	238	258	Arabidopsis thaliana	common cis-acting element in promoter and enhancer regions
GmCOMT51	CAAT-box	CAAAT	299	319	Pisum sativum	common cis-acting element in promoter and enhancer regions
GmCOMT51	CAAT-box	CAAAT	360	380	Pisum sativum	common cis-acting element in promoter and enhancer regions
GmCOMT51	CAAT-box	CAAAT	405	425	Pisum sativum	common cis-acting element in promoter and enhancer regions
GmCOMT51	CAAT-box	CAAT	446	466	Nicotiana glutinosa
GmCOMT51	CAAT-box	CAAAT	455	475	Pisum sativum	common cis-acting element in promoter and enhancer regions
GmCOMT51	CAAT-box	CAAAT	496	516	Pisum sativum	common cis-acting element in promoter and enhancer regions
GmCOMT51	CAAT-box	CAAT	562	582	Nicotiana glutinosa
GmCOMT51	CAAT-box	CAAT	602	622	Nicotiana glutinosa
GmCOMT51	CAAT-box	CAAAT	652	672	Pisum sativum	common cis-acting element in promoter and enhancer regions
GmCOMT51	CAAT-box	CAAAT	690	710	Pisum sativum	common cis-acting element in promoter and enhancer regions
GmCOMT51	CAAT-box	CAAT	742	762	Nicotiana glutinosa
GmCOMT51	CAAT-box	CAAT	746	766	Nicotiana glutinosa
GmCOMT51	CAAT-box	CAAT	822	842	Nicotiana glutinosa
GmCOMT51	CAAT-box	CAAT	863	883	Nicotiana glutinosa
GmCOMT51	CAAT-box	CAAAT	894	914	Pisum sativum	common cis-acting element in promoter and enhancer regions
GmCOMT51	CAAT-box	CAAT	991	1011	Nicotiana glutinosa
GmCOMT51	CAAT-box	CCAAT	1020	1040	Arabidopsis thaliana	common cis-acting element in promoter and enhancer regions
GmCOMT51	CAAT-box	CAAT	1021	1041	Nicotiana glutinosa
GmCOMT51	CAAT-box	CAAAT	1078	1098	Pisum sativum	common cis-acting element in promoter and enhancer regions
GmCOMT51	CAAT-box	CAAAT	1089	1109	Pisum sativum	common cis-acting element in promoter and enhancer regions
GmCOMT51	CAAT-box	CAAT	1209	1229	Nicotiana glutinosa
GmCOMT51	CAAT-box	CCAAT	1261	1281	Arabidopsis thaliana	common cis-acting element in promoter and enhancer regions
GmCOMT51	CAAT-box	CCAAT	1303	1323	Arabidopsis thaliana	common cis-acting element in promoter and enhancer regions
GmCOMT51	CAAT-box	CAAT	1339	1359	Nicotiana glutinosa
GmCOMT51	CAAT-box	CAAT	1432	1452	Nicotiana glutinosa
GmCOMT51	CAAT-box	CAAT	1580	1600	Nicotiana glutinosa
GmCOMT51	CAAT-box	CAAAT	1616	1636	Pisum sativum	common cis-acting element in promoter and enhancer regions
GmCOMT51	CAAT-box	CAAAT	1762	1782	Pisum sativum	common cis-acting element in promoter and enhancer regions
GmCOMT51	CAAT-box	CAAAT	1866	1886	Pisum sativum	common cis-acting element in promoter and enhancer regions
GmCOMT51	CAAT-box	CAAT	1988	2008	Nicotiana glutinosa
GmCOMT51	G-box	TAACACGTAG	1185	1205	Brassica oleracea	cis-acting regulatory element involved in light responsiveness
GmCOMT51	G-box	TACGTG	1188	1208	Arabidopsis thaliana	cis-acting regulatory element involved in light responsiveness
GmCOMT51	chs-CMA1a	TTACTTAA	230	250	Daucus carota	part of a light responsive element
GmCOMT51	ABRE	ACGTG	83	103	Arabidopsis thaliana	cis-acting element involved in the abscisic acid responsiveness
GmCOMT51	ABRE	ACGTG	1188	1208	Arabidopsis thaliana	cis-acting element involved in the abscisic acid responsiveness
GmCOMT51	ARE	AAACCA	715	735	Zea mays	cis-acting regulatory element essential for the anaerobic induction
GmCOMT51	WRE3	CCACCT	8	28	Pisum sativum
GmCOMT51	WRE3	CCACCT	1908	1928	Pisum sativum
GmCOMT51	GT1-motif	GGTTAA	964	984	Arabidopsis thaliana	light responsive element
GmCOMT47	MBS	CAACTG	1353	1373	Arabidopsis thaliana	MYB binding site involved in drought-inducibility
GmCOMT47	TCT-motif	TCTTAC	335	355	Arabidopsis thaliana	part of a light responsive element
GmCOMT47	W box	TTGACC	869	889	Arabidopsis thaliana
GmCOMT47	CGTCA-motif	CGTCA	1089	1109	Hordeum vulgare	cis-acting regulatory element involved in the MeJA-responsiveness
GmCOMT47	CGTCA-motif	CGTCA	1652	1672	Hordeum vulgare	cis-acting regulatory element involved in the MeJA-responsiveness
GmCOMT47	Myb	CAACTG	1353	1373	Arabidopsis thaliana
GmCOMT47	Myb	TAACTG	1436	1456	Arabidopsis thaliana
GmCOMT47	Myc	TCTCTTA	759	779	Arabidopsis thaliana
GmCOMT47	Box 4	ATTAAT	52	72	Petroselinum crispum	part of a conserved DNA module involved in light responsiveness
GmCOMT47	Box 4	ATTAAT	208	228	Petroselinum crispum	part of a conserved DNA module involved in light responsiveness
GmCOMT47	Box 4	ATTAAT	731	751	Petroselinum crispum	part of a conserved DNA module involved in light responsiveness
GmCOMT47	Box 4	ATTAAT	1456	1476	Petroselinum crispum	part of a conserved DNA module involved in light responsiveness
GmCOMT47	Box 4	ATTAAT	1460	1480	Petroselinum crispum	part of a conserved DNA module involved in light responsiveness
GmCOMT47	Box 4	ATTAAT	1636	1656	Petroselinum crispum	part of a conserved DNA module involved in light responsiveness
GmCOMT47	Box 4	ATTAAT	1816	1836	Petroselinum crispum	part of a conserved DNA module involved in light responsiveness
GmCOMT47	ERE	ATTTTAAA	45	65	Nicotiana glutinos
GmCOMT47	ERE	ATTTCATA	1989	2009	Nicotiana glutinos
GmCOMT47	MYB	TAACCA	388	408	Arabidopsis thaliana
GmCOMT47	MYB	CAACAG	1092	1112	Arabidopsis thaliana
GmCOMT47	MYB	TAACCA	1231	1251	Arabidopsis thaliana
GmCOMT47	MYB	CAACCA	1254	1274	Arabidopsis thaliana
GmCOMT47	MYB	CAACCA	1263	1283	Arabidopsis thaliana
GmCOMT47	MYB	TAACCA	1524	1544	Arabidopsis thaliana
GmCOMT47	MYC	CATTTG	267	287	Arabidopsis thaliana
GmCOMT47	MYC	CATGTG	1102	1122	Arabidopsis thaliana
GmCOMT47	MYC	CATGTG	1363	1383	Arabidopsis thaliana
GmCOMT47	MYC	CATTTG	1568	1588	Arabidopsis thaliana
GmCOMT47	ARE	AAACCA	726	746	Zea mays	cis-acting regulatory element essential for the anaerobic induction
GmCOMT47	ARE	AAACCA	1031	1051	Zea mays	cis-acting regulatory element essential for the anaerobic induction
GmCOMT47	CAT-box	GCCACT	1116	1136	Arabidopsis thaliana	cis-acting regulatory element related to meristem expression
GmCOMT47	MRE	AACCTAA	1784	1804	Petroselinum crispum	MYB binding site involved in light responsiveness
GmCOMT47	WRE3	CCACCT	661	681	Pisum sativum
GmCOMT47	WRE3	CCACCT	1034	1054	Pisum sativum
GmCOMT47	GT1-motif	GGTTAA	1525	1545	Arabidopsis thaliana	light responsive element
GmCOMT47	GT1-motif	GGTTAA	1787	1807	Arabidopsis thaliana	light responsive element
GmCOMT47	as-1	TGACG	1089	1109	Arabidopsis thaliana
GmCOMT47	as-1	TGACG	1652	1672	Arabidopsis thaliana
GmCOMT47	TATC-box	TATCCCA	652	672	Oryza sativa	cis-acting element involved in gibberellin-responsiveness
GmCOMT47	CAG-motif	GAAAGGCAGAC	1157	1177	Arabidopsis thaliana	part of a light response element
GmCOMT47	ABRE	ACGTG	1087	1107	Arabidopsis thaliana	cis-acting element involved in the abscisic acid responsiveness
GmCOMT47	ABRE	ACGTG	1404	1424	Arabidopsis thaliana	cis-acting element involved in the abscisic acid responsiveness
GmCOMT47	AE-box	AGAAACTT	1770	1790	Arabidopsis thaliana	part of a module for light response
GmCOMT47	TGACG-motif	TGACG	1089	1109	Hordeum vulgare	cis-acting regulatory element involved in the MeJA-responsiveness
GmCOMT47	TGACG-motif	TGACG	1652	1672	Hordeum vulgare	cis-acting regulatory element involved in the MeJA-responsiveness
GmCOMT47	CAAT-box	CAAT	5	25	Nicotiana glutinosa
GmCOMT47	CAAT-box	CAAAT	26	46	Pisum sativum	common cis-acting element in promoter and enhancer regions
GmCOMT47	CAAT-box	CAAT	43	63	Nicotiana glutinosa
GmCOMT47	CAAT-box	CAAT	60	80	Nicotiana glutinosa
GmCOMT47	CAAT-box	CCAAT	110	130	Arabidopsis thaliana	common cis-acting element in promoter and enhancer regions
GmCOMT47	CAAT-box	CAAT	119	139	Nicotiana glutinosa
GmCOMT47	CAAT-box	CAAT	182	202	Nicotiana glutinosa
GmCOMT47	CAAT-box	CCAAT	212	232	Arabidopsis thaliana	common cis-acting element in promoter and enhancer regions
GmCOMT47	CAAT-box	CAAAT	267	287	Pisum sativum	common cis-acting element in promoter and enhancer regions
GmCOMT47	CAAT-box	CAAAT	275	295	Pisum sativum	common cis-acting element in promoter and enhancer regions
GmCOMT47	CAAT-box	CAAAT	343	363	Pisum sativum	common cis-acting element in promoter and enhancer regions
GmCOMT47	CAAT-box	CAAT	414	434	Nicotiana glutinosa
GmCOMT47	CAAT-box	CAAAT	446	466	Pisum sativum	common cis-acting element in promoter and enhancer regions
GmCOMT47	CAAT-box	CAAT	496	516	Nicotiana glutinosa
GmCOMT47	CAAT-box	CAAT	501	521	Nicotiana glutinosa
GmCOMT47	CAAT-box	CCAAT	593	613	Arabidopsis thaliana	common cis-acting element in promoter and enhancer regions
GmCOMT47	CAAT-box	CAAT	644	664	Nicotiana glutinosa
GmCOMT47	CAAT-box	CAAT	817	837	Nicotiana glutinosa
GmCOMT47	CAAT-box	CAAAT	825	845	Pisum sativum	common cis-acting element in promoter and enhancer regions
GmCOMT47	CAAT-box	CAAT	868	888	Nicotiana glutinosa
GmCOMT47	CAAT-box	CAAT	900	920	Nicotiana glutinosa
GmCOMT47	CAAT-box	CCAAT	904	924	Arabidopsis thaliana	common cis-acting element in promoter and enhancer regions
GmCOMT47	CAAT-box	CAAT	905	925	Nicotiana glutinosa
GmCOMT47	CAAT-box	CAAAT	927	947	Pisum sativum	common cis-acting element in promoter and enhancer regions
GmCOMT47	CAAT-box	CAAT	930	950	Nicotiana glutinosa
GmCOMT47	CAAT-box	CAAT	1128	1148	Nicotiana glutinosa
GmCOMT47	CAAT-box	CAAAT	1172	1192	Pisum sativum	common cis-acting element in promoter and enhancer regions
GmCOMT47	CAAT-box	CAAT	1191	1211	Nicotiana glutinosa
GmCOMT47	CAAT-box	CAAT	1316	1336	Nicotiana glutinosa
GmCOMT47	CAAT-box	CAAT	1485	1505	Nicotiana glutinosa
GmCOMT47	CAAT-box	CAAAT	1568	1588	Pisum sativum	common cis-acting element in promoter and enhancer regions
GmCOMT47	CAAT-box	CAAAT	1602	1622	Pisum sativum	common cis-acting element in promoter and enhancer regions
GmCOMT47	CAAT-box	CAAT	1613	1633	Nicotiana glutinosa
GmCOMT47	CAAT-box	CAAAT	1620	1640	Pisum sativum	common cis-acting element in promoter and enhancer regions
GmCOMT47	CAAT-box	CAAAT	1713	1733	Pisum sativum	common cis-acting element in promoter and enhancer regions
GmCOMT47	CAAT-box	CAAAT	1811	1831	Pisum sativum	common cis-acting element in promoter and enhancer regions
GmCOMT47	CAAT-box	CCAAT	1825	1845	Arabidopsis thaliana	common cis-acting element in promoter and enhancer regions
GmCOMT47	CAAT-box	CAAT	1826	1846	Nicotiana glutinosa
GmCOMT47	CAAT-box	CAAT	1926	1946	Nicotiana glutinosa
GmCOMT47	G-box	CACGAC	32	52	Zea mays	cis-acting regulatory element involved in light responsiveness
GmCOMT47	G-box	CACGTC	1087	1107	Zea mays	cis-acting regulatory element involved in light responsiveness
GmCOMT47	G-box	TACGTG	1404	1424	Arabidopsis thaliana	cis-acting regulatory element involved in light responsiveness
GmCOMT47	O2-site	GTTGACGTGA	1086	1106	Zea mays	cis-acting regulatory element involved in zein metabolism regulation
GmCOMT47	TC-rich repeats	ATTCTCTAAC	1939	1959	Nicotiana tabacum	cis-acting element involved in defense and stress responsiveness
GmCOMT47	STRE	AGGGG	393	413	Arabidopsis thaliana
GmCOMT47	STRE	AGGGG	1839	1859	Arabidopsis thaliana
GmCOMT47	STRE	AGGGG	1873	1893	Arabidopsis thaliana
GmCOMT49	as-1	TGACG	341	361	Arabidopsis thaliana
GmCOMT49	as-1	TGACG	513	533	Arabidopsis thaliana
GmCOMT49	as-1	TGACG	602	622	Arabidopsis thaliana
GmCOMT49	WRE3	CCACCT	1491	1511	Pisum sativum
GmCOMT49	GT1-motif	GGTTAAT	1922	1942	Avena sativa	light responsive element
GmCOMT49	GT1-motif	GGTTAA	1945	1965	Arabidopsis thaliana	light responsive element
GmCOMT49	CCAAT-box	CAACGG	382	402	Hordeum vulgare	MYBHv1 binding site
GmCOMT49	ARE	AAACCA	1759	1779	Zea mays	cis-acting regulatory element essential for the anaerobic induction
GmCOMT49	CAT-box	GCCACT	1653	1673	Arabidopsis thaliana	cis-acting regulatory element related to meristem expression
GmCOMT49	MRE	AACCTAA	1345	1365	Petroselinum crispum	MYB binding site involved in light responsiveness
GmCOMT49	G-box	TAACACGTAG	1401	1421	Brassica oleracea	cis-acting regulatory element involved in light responsiveness
GmCOMT49	CAAT-box	CAAT	48	68	Nicotiana glutinosa
GmCOMT49	CAAT-box	CAAAT	81	101	Pisum sativum	common cis-acting element in promoter and enhancer regions
GmCOMT49	CAAT-box	CAAAT	216	236	Pisum sativum	common cis-acting element in promoter and enhancer regions
GmCOMT49	CAAT-box	CAAAT	317	337	Pisum sativum	common cis-acting element in promoter and enhancer regions
GmCOMT49	CAAT-box	CAAT	320	340	Nicotiana glutinosa
GmCOMT49	CAAT-box	CAAT	423	443	Nicotiana glutinosa
GmCOMT49	CAAT-box	CAAAT	427	447	Pisum sativum	common cis-acting element in promoter and enhancer regions
GmCOMT49	CAAT-box	CCAAT	450	470	Arabidopsis thaliana	common cis-acting element in promoter and enhancer regions
GmCOMT49	CAAT-box	CAAAT	497	517	Pisum sativum	common cis-acting element in promoter and enhancer regions
GmCOMT49	CAAT-box	CAAAT	611	631	Pisum sativum	common cis-acting element in promoter and enhancer regions
GmCOMT49	CAAT-box	CCAAT	659	679	Arabidopsis thaliana	common cis-acting element in promoter and enhancer regions
GmCOMT49	CAAT-box	CAAT	660	680	Nicotiana glutinosa
GmCOMT49	CAAT-box	CCAAT	731	751	Arabidopsis thaliana	common cis-acting element in promoter and enhancer regions
GmCOMT49	CAAT-box	CAAT	732	752	Nicotiana glutinosa
GmCOMT49	CAAT-box	CCAAT	869	889	Arabidopsis thaliana	common cis-acting element in promoter and enhancer regions
GmCOMT49	CAAT-box	CAAT	870	890	Nicotiana glutinosa
GmCOMT49	CAAT-box	CAAAT	903	923	Pisum sativum	common cis-acting element in promoter and enhancer regions
GmCOMT49	CAAT-box	CAAT	1007	1027	Nicotiana glutinosa
GmCOMT49	CAAT-box	CAAT	1031	1051	Nicotiana glutinosa
GmCOMT49	CAAT-box	CCAAT	1100	1120	Arabidopsis thaliana	common cis-acting element in promoter and enhancer regions
GmCOMT49	CAAT-box	CAAAT	1229	1249	Pisum sativum	common cis-acting element in promoter and enhancer regions
GmCOMT49	CAAT-box	CAAT	1260	1280	Nicotiana glutinosa
GmCOMT49	CAAT-box	CAAAT	1441	1461	Pisum sativum	common cis-acting element in promoter and enhancer regions
GmCOMT49	CAAT-box	CAAAT	1598	1618	Pisum sativum	common cis-acting element in promoter and enhancer regions
GmCOMT49	CAAT-box	CAAT	1604	1624	Nicotiana glutinosa
GmCOMT49	CAAT-box	CAAAT	1617	1637	Pisum sativum	common cis-acting element in promoter and enhancer regions
GmCOMT49	CAAT-box	CAAT	1805	1825	Nicotiana glutinosa
GmCOMT49	CAAT-box	CAAT	1860	1880	Nicotiana glutinosa
GmCOMT49	CAAT-box	CAAT	1862	1882	Nicotiana glutinosa
GmCOMT49	CAAT-box	CCAAT	1868	1888	Arabidopsis thaliana	common cis-acting element in promoter and enhancer regions
GmCOMT49	CAAT-box	CAAT	1869	1889	Nicotiana glutinosa
GmCOMT49	CAAT-box	CAAAT	1890	1910	Pisum sativum	common cis-acting element in promoter and enhancer regions
GmCOMT49	CAAT-box	CAAAT	1903	1923	Pisum sativum	common cis-acting element in promoter and enhancer regions
GmCOMT49	CAAT-box	CAAAT	1918	1938	Pisum sativum	common cis-acting element in promoter and enhancer regions
GmCOMT49	CAAT-box	CAAAT	1966	1986	Pisum sativum	common cis-acting element in promoter and enhancer regions
GmCOMT49	TGACG-motif	TGACG	341	361	Hordeum vulgare	cis-acting regulatory element involved in the MeJA-responsiveness
GmCOMT49	TGACG-motif	TGACG	513	533	Hordeum vulgare	cis-acting regulatory element involved in the MeJA-responsiveness
GmCOMT49	TGACG-motif	TGACG	602	622	Hordeum vulgare	cis-acting regulatory element involved in the MeJA-responsiveness
GmCOMT49	P-box	CCTTTTG	1675	1695	Oryza sativa	gibberellin-responsive element
GmCOMT49	STRE	AGGGG	631	651	Arabidopsis thaliana
GmCOMT49	STRE	AGGGG	1037	1057	Arabidopsis thaliana
GmCOMT49	O2-site	GATGATGTGG	458	478	Zea mays	cis-acting regulatory element involved in zein metabolism regulation
GmCOMT49	W box	TTGACC	186	206	Arabidopsis thaliana
GmCOMT49	MBS	CAACTG	1123	1143	Arabidopsis thaliana	MYB binding site involved in drought-inducibility
GmCOMT49	MBS	CAACTG	1689	1709	Arabidopsis thaliana	MYB binding site involved in drought-inducibility
GmCOMT49	TCA	TCATCTTCAT	1140	1160	Pisum sativum
GmCOMT49	TCA	TCATCTTCAT	1218	1238	Pisum sativum
GmCOMT49	Myb	CAACTG	1123	1143	Arabidopsis thaliana
GmCOMT49	Myb	CAACTG	1689	1709	Arabidopsis thaliana
GmCOMT49	CGTCA-motif	CGTCA	341	361	Hordeum vulgare	cis-acting regulatory element involved in the MeJA-responsiveness
GmCOMT49	CGTCA-motif	CGTCA	513	533	Hordeum vulgare	cis-acting regulatory element involved in the MeJA-responsiveness
GmCOMT49	CGTCA-motif	CGTCA	602	622	Hordeum vulgare	cis-acting regulatory element involved in the MeJA-responsiveness
GmCOMT49	LTR	CCGAAA	1784	1804	Hordeum vulgare	cis-acting element involved in low-temperature responsiveness
GmCOMT49	Box 4	ATTAAT	172	192	Petroselinum crispum	part of a conserved DNA module involved in light responsiveness
GmCOMT49	Box 4	ATTAAT	392	412	Petroselinum crispum	part of a conserved DNA module involved in light responsiveness
GmCOMT49	Box 4	ATTAAT	558	578	Petroselinum crispum	part of a conserved DNA module involved in light responsiveness
GmCOMT49	Box 4	ATTAAT	1067	1087	Petroselinum crispum	part of a conserved DNA module involved in light responsiveness
GmCOMT49	Box 4	ATTAAT	1278	1298	Petroselinum crispum	part of a conserved DNA module involved in light responsiveness
GmCOMT49	Box 4	ATTAAT	1840	1860	Petroselinum crispum	part of a conserved DNA module involved in light responsiveness
GmCOMT49	GATA-motif	GATAGGG	1034	1054	Pisum sativum	part of a light responsive element
GmCOMT49	ERE	ATTTTAAA	198	218	Nicotiana glutinos
GmCOMT49	MYB	CAACAG	1563	1583	Arabidopsis thaliana
GmCOMT49	MYB	TAACCA	1921	1941	Arabidopsis thaliana
GmCOMT49	MYC	CATTTG	496	516	Arabidopsis thaliana
GmCOMT49	MYC	CATTTG	610	630	Arabidopsis thaliana
GmCOMT49	MYC	CATTTG	1441	1461	Arabidopsis thaliana
GmCOMT49	MYC	CATTTG	1598	1618	Arabidopsis thaliana
GmCOMT49	MYC	CAATTG	1860	1880	Arabidopsis thaliana
GmCOMT48	STRE	AGGGG	1572	1592	Arabidopsis thaliana
GmCOMT48	WUN-motif	AAATTACTA	1782	1802	Nicotiana glutinosa
GmCOMT48	TC-rich repeats	ATTCTCTAAC	27	47	Nicotiana tabacum	cis-acting element involved in defense and stress responsiveness
GmCOMT48	P-box	CCTTTTG	582	602	Oryza sativa	gibberellin-responsive element
GmCOMT48	TGACG-motif	TGACG	891	911	Hordeum vulgare	cis-acting regulatory element involved in the MeJA-responsiveness
GmCOMT48	TGACG-motif	TGACG	1496	1516	Hordeum vulgare	cis-acting regulatory element involved in the MeJA-responsiveness
GmCOMT48	chs-CMA2a	TCACTTGA	1309	1329	Petroselinum crispum	part of a light responsive element
GmCOMT48	CAAT-box	CAAT	11	31	Nicotiana glutinosa
GmCOMT48	CAAT-box	CAAT	71	91	Nicotiana glutinosa
GmCOMT48	CAAT-box	CCCAATTT	91	111	Arabidopsis thaliana	common cis-acting element in promoter and enhancer regions
GmCOMT48	CAAT-box	CCAAT	92	112	Arabidopsis thaliana	common cis-acting element in promoter and enhancer regions
GmCOMT48	CAAT-box	CAAT	93	113	Nicotiana glutinosa
GmCOMT48	CAAT-box	CAAT	114	134	Nicotiana glutinosa
GmCOMT48	CAAT-box	CCAAT	413	433	Arabidopsis thaliana	common cis-acting element in promoter and enhancer regions
GmCOMT48	CAAT-box	CAAT	414	434	Nicotiana glutinosa
GmCOMT48	CAAT-box	CAAT	451	471	Nicotiana glutinosa
GmCOMT48	CAAT-box	CAAT	464	484	Nicotiana glutinosa
GmCOMT48	CAAT-box	CCAAT	477	497	Arabidopsis thaliana	common cis-acting element in promoter and enhancer regions
GmCOMT48	CAAT-box	CAAT	478	498	Nicotiana glutinosa
GmCOMT48	CAAT-box	CAAT	520	540	Nicotiana glutinosa
GmCOMT48	CAAT-box	CAAAT	601	621	Pisum sativum	common cis-acting element in promoter and enhancer regions
GmCOMT48	CAAT-box	CAAT	616	636	Nicotiana glutinosa
GmCOMT48	CAAT-box	CAAT	650	670	Nicotiana glutinosa
GmCOMT48	CAAT-box	CCAAT	670	690	Arabidopsis thaliana	common cis-acting element in promoter and enhancer regions
GmCOMT48	CAAT-box	CAAT	671	691	Nicotiana glutinosa
GmCOMT48	CAAT-box	CCAAT	736	756	Arabidopsis thaliana	common cis-acting element in promoter and enhancer regions
GmCOMT48	CAAT-box	CAAT	737	757	Nicotiana glutinosa
GmCOMT48	CAAT-box	CAAAT	743	763	Pisum sativum	common cis-acting element in promoter and enhancer regions
GmCOMT48	CAAT-box	CAAT	781	801	Nicotiana glutinosa
GmCOMT48	CAAT-box	CAAT	824	844	Nicotiana glutinosa
GmCOMT48	CAAT-box	CAAAT	839	859	Pisum sativum	common cis-acting element in promoter and enhancer regions
GmCOMT48	CAAT-box	CAAT	919	939	Nicotiana glutinosa
GmCOMT48	CAAT-box	CAAT	939	959	Nicotiana glutinosa
GmCOMT48	CAAT-box	CAAT	992	1012	Nicotiana glutinosa
GmCOMT48	CAAT-box	CAAAT	1055	1075	Pisum sativum	common cis-acting element in promoter and enhancer regions
GmCOMT48	CAAT-box	CAAT	1099	1119	Nicotiana glutinosa
GmCOMT48	CAAT-box	CAAAT	1177	1197	Pisum sativum	common cis-acting element in promoter and enhancer regions
GmCOMT48	CAAT-box	CAAT	1207	1227	Nicotiana glutinosa
GmCOMT48	CAAT-box	CAAT	1215	1235	Nicotiana glutinosa
GmCOMT48	CAAT-box	CAAT	1259	1279	Nicotiana glutinosa
GmCOMT48	CAAT-box	CAAAT	1329	1349	Pisum sativum	common cis-acting element in promoter and enhancer regions
GmCOMT48	CAAT-box	CAAT	1337	1357	Nicotiana glutinosa
GmCOMT48	CAAT-box	CAAAT	1419	1439	Pisum sativum	common cis-acting element in promoter and enhancer regions
GmCOMT48	CAAT-box	CAAT	1470	1490	Nicotiana glutinosa
GmCOMT48	CAAT-box	CAAT	1499	1519	Nicotiana glutinosa
GmCOMT48	CAAT-box	CAAAT	1508	1528	Pisum sativum	common cis-acting element in promoter and enhancer regions
GmCOMT48	CAAT-box	CCAAT	1664	1684	Arabidopsis thaliana	common cis-acting element in promoter and enhancer regions
GmCOMT48	CAAT-box	CAAT	1665	1685	Nicotiana glutinosa
GmCOMT48	CAAT-box	CAAT	1715	1735	Nicotiana glutinosa
GmCOMT48	CAAT-box	CAAAT	1773	1793	Pisum sativum	common cis-acting element in promoter and enhancer regions
GmCOMT48	CAAT-box	CCAAT	1920	1940	Arabidopsis thaliana	common cis-acting element in promoter and enhancer regions
GmCOMT48	CAAT-box	CAAT	1921	1941	Nicotiana glutinosa
GmCOMT48	MRE	AACCTAA	62	82	Petroselinum crispum	MYB binding site involved in light responsiveness
GmCOMT48	CAT-box	GCCACT	1439	1459	Arabidopsis thaliana	cis-acting regulatory element related to meristem expression
GmCOMT48	CAT-box	GCCACT	1596	1616	Arabidopsis thaliana	cis-acting regulatory element related to meristem expression
GmCOMT48	ARE	AAACCA	537	557	Zea mays	cis-acting regulatory element essential for the anaerobic induction
GmCOMT48	ARE	AAACCA	597	617	Zea mays	cis-acting regulatory element essential for the anaerobic induction
GmCOMT48	ARE	AAACCA	733	753	Zea mays	cis-acting regulatory element essential for the anaerobic induction
GmCOMT48	ARE	AAACCA	1670	1690	Zea mays	cis-acting regulatory element essential for the anaerobic induction
GmCOMT48	GT1-motif	GGTTAA	60	80	Arabidopsis thaliana	light responsive element
GmCOMT48	GT1-motif	GGTTAA	571	591	Arabidopsis thaliana	light responsive element
GmCOMT48	CCAAT-box	CAACGG	567	587	Hordeum vulgare	MYBHv1 binding site
GmCOMT48	as-1	TGACG	891	911	Arabidopsis thaliana
GmCOMT48	as-1	TGACG	1496	1516	Arabidopsis thaliana
GmCOMT48	circadian	CAAAGATATC	661	681	Lycopersicon esculentum	cis-acting regulatory element involved in circadian control
GmCOMT48	TCA-element	CCATCTTTTT	933	953	Nicotiana tabacum	cis-acting element involved in salicylic acid responsiveness
GmCOMT48	ERE	ATTTTAAA	1851	1871	Nicotiana glutinos
GmCOMT48	MYB	CAACCA	410	430	Arabidopsis thaliana
GmCOMT48	MYB	TAACCA	667	687	Arabidopsis thaliana
GmCOMT48	MYB	TAACCA	1169	1189	Arabidopsis thaliana
GmCOMT48	MYB	CAACAG	1383	1403	Arabidopsis thaliana
GmCOMT48	GATA-motif	GATAGGA	373	393	Arabidopsis thaliana	part of a light responsive element
GmCOMT48	GATA-motif	AAGATAAGATT	628	648	Arabidopsis thaliana	part of a light responsive element
GmCOMT48	Box 4	ATTAAT	221	241	Petroselinum crispum	part of a conserved DNA module involved in light responsiveness
GmCOMT48	Box 4	ATTAAT	327	347	Petroselinum crispum	part of a conserved DNA module involved in light responsiveness
GmCOMT48	Box 4	ATTAAT	739	759	Petroselinum crispum	part of a conserved DNA module involved in light responsiveness
GmCOMT48	Box 4	ATTAAT	842	862	Petroselinum crispum	part of a conserved DNA module involved in light responsiveness
GmCOMT48	LTR	CCGAAA	1109	1129	Hordeum vulgare	cis-acting element involved in low-temperature responsiveness
GmCOMT48	LTR	CCGAAA	1689	1709	Hordeum vulgare	cis-acting element involved in low-temperature responsiveness
GmCOMT48	CGTCA-motif	CGTCA	891	911	Hordeum vulgare	cis-acting regulatory element involved in the MeJA-responsiveness
GmCOMT48	CGTCA-motif	CGTCA	1496	1516	Hordeum vulgare	cis-acting regulatory element involved in the MeJA-responsiveness
GmCOMT48	Myb	TAACTG	1447	1467	Arabidopsis thaliana
GmCOMT48	Myb	CAACTG	1709	1729	Arabidopsis thaliana
GmCOMT48	MBS	CAACTG	1709	1729	Arabidopsis thaliana	MYB binding site involved in drought-inducibility
GmCOMT48	TCA	TCATCTTCAT	1313	1333	Pisum sativum
GmCOMT48	W box	TTGACC	452	472	Arabidopsis thaliana
GmCOMT48	TCT-motif	TCTTAC	1975	1995	Arabidopsis thaliana	part of a light responsive element
GmCOMT37	CAAT-box	CAAT	0	20	Nicotiana glutinosa
GmCOMT37	CAAT-box	CAAT	44	64	Nicotiana glutinosa
GmCOMT37	CAAT-box	CCAAT	86	106	Arabidopsis thaliana	common cis-acting element in promoter and enhancer regions
GmCOMT37	CAAT-box	CAAT	87	107	Nicotiana glutinosa
GmCOMT37	CAAT-box	CAAT	169	189	Nicotiana glutinosa
GmCOMT37	CAAT-box	CCAAT	345	365	Arabidopsis thaliana	common cis-acting element in promoter and enhancer regions
GmCOMT37	CAAT-box	CCCAATTT	567	587	Arabidopsis thaliana	common cis-acting element in promoter and enhancer regions
GmCOMT37	CAAT-box	CCAAT	569	589	Arabidopsis thaliana	common cis-acting element in promoter and enhancer regions
GmCOMT37	CAAT-box	CAAT	616	636	Nicotiana glutinosa
GmCOMT37	CAAT-box	CAAAT	688	708	Pisum sativum	common cis-acting element in promoter and enhancer regions
GmCOMT37	CAAT-box	CAAT	714	734	Nicotiana glutinosa
GmCOMT37	CAAT-box	CCAAT	816	836	Arabidopsis thaliana	common cis-acting element in promoter and enhancer regions
GmCOMT37	CAAT-box	CCAAT	875	895	Arabidopsis thaliana	common cis-acting element in promoter and enhancer regions
GmCOMT37	CAAT-box	CAAT	1006	1026	Nicotiana glutinosa
GmCOMT37	CAAT-box	CAAT	1147	1167	Nicotiana glutinosa
GmCOMT37	CAAT-box	CAAT	1149	1169	Nicotiana glutinosa
GmCOMT37	CAAT-box	CAAAT	1162	1182	Pisum sativum	common cis-acting element in promoter and enhancer regions
GmCOMT37	CAAT-box	CAAT	1178	1198	Nicotiana glutinosa
GmCOMT37	CAAT-box	CAAT	1182	1202	Nicotiana glutinosa
GmCOMT37	CAAT-box	CAAAT	1187	1207	Pisum sativum	common cis-acting element in promoter and enhancer regions
GmCOMT37	CAAT-box	CAAAT	1412	1432	Pisum sativum	common cis-acting element in promoter and enhancer regions
GmCOMT37	CAAT-box	CAAT	1415	1435	Nicotiana glutinosa
GmCOMT37	CAAT-box	CAAAT	1492	1512	Pisum sativum	common cis-acting element in promoter and enhancer regions
GmCOMT37	CAAT-box	CAAT	1495	1515	Nicotiana glutinosa
GmCOMT37	CAAT-box	CAAT	1534	1554	Nicotiana glutinosa
GmCOMT37	CAAT-box	CAAT	1554	1574	Nicotiana glutinosa
GmCOMT37	CAAT-box	CAAT	1647	1667	Nicotiana glutinosa
GmCOMT37	CAAT-box	CAAAT	1745	1765	Pisum sativum	common cis-acting element in promoter and enhancer regions
GmCOMT37	CAAT-box	CAAAT	1817	1837	Pisum sativum	common cis-acting element in promoter and enhancer regions
GmCOMT37	CAAT-box	CAAAT	1861	1881	Pisum sativum	common cis-acting element in promoter and enhancer regions
GmCOMT37	CAAT-box	CAAT	1885	1905	Nicotiana glutinosa
GmCOMT37	CAAT-box	CAAT	1912	1932	Nicotiana glutinosa
GmCOMT37	CAAT-box	CAAAT	1972	1992	Pisum sativum	common cis-acting element in promoter and enhancer regions
GmCOMT37	STRE	AGGGG	1277	1297	Arabidopsis thaliana
GmCOMT37	WUN-motif	AAATTACT	284	304	Nicotiana glutinosa
GmCOMT37	ARE	AAACCA	347	367	Zea mays	cis-acting regulatory element essential for the anaerobic induction
GmCOMT37	ARE	AAACCA	1968	1988	Zea mays	cis-acting regulatory element essential for the anaerobic induction
GmCOMT37	WRE3	CCACCT	1239	1259	Pisum sativum
GmCOMT37	WRE3	CCACCT	1271	1291	Pisum sativum
GmCOMT37	WRE3	CCACCT	1321	1341	Pisum sativum
GmCOMT37	WRE3	CCACCT	1436	1456	Pisum sativum
GmCOMT37	AE-box	AGAAACAA	521	541	Arabidopsis thaliana	part of a module for light response
GmCOMT37	Box 4	ATTAAT	305	325	Petroselinum crispum	part of a conserved DNA module involved in light responsiveness
GmCOMT37	Box 4	ATTAAT	341	361	Petroselinum crispum	part of a conserved DNA module involved in light responsiveness
GmCOMT37	Box 4	ATTAAT	666	686	Petroselinum crispum	part of a conserved DNA module involved in light responsiveness
GmCOMT37	Box 4	ATTAAT	859	879	Petroselinum crispum	part of a conserved DNA module involved in light responsiveness
GmCOMT37	Box 4	ATTAAT	1656	1676	Petroselinum crispum	part of a conserved DNA module involved in light responsiveness
GmCOMT37	Box 4	ATTAAT	1686	1706	Petroselinum crispum	part of a conserved DNA module involved in light responsiveness
GmCOMT37	Box 4	ATTAAT	1841	1861	Petroselinum crispum	part of a conserved DNA module involved in light responsiveness
GmCOMT37	GATA-motif	GATAGGA	638	658	Arabidopsis thaliana	part of a light responsive element
GmCOMT37	GATA-motif	GATAGGA	1504	1524	Arabidopsis thaliana	part of a light responsive element
GmCOMT37	ERE	ATTTTAAA	357	377	Nicotiana glutinos
GmCOMT37	MYB	CAACCA	649	669	Arabidopsis thaliana
GmCOMT37	MYB	CAACCA	818	838	Arabidopsis thaliana
GmCOMT37	TCA-element	CCATCTTTTT	495	515	Nicotiana tabacum	cis-acting element involved in salicylic acid responsiveness
GmCOMT37	MYC	CAATTG	1147	1167	Arabidopsis thaliana
GmCOMT37	TCT-motif	TCTTAC	1539	1559	Arabidopsis thaliana	part of a light responsive element
GmCOMT37	MBS	CAACTG	1823	1843	Arabidopsis thaliana	MYB binding site involved in drought-inducibility
GmCOMT37	AT1-motif	AATTATTTTTTATT	277	297	Solanum tuberosum	part of a light responsive module
GmCOMT37	Myb	TAACTG	1308	1328	Arabidopsis thaliana
GmCOMT37	Myb	CAACTG	1823	1843	Arabidopsis thaliana
GmCOMT30	ARE	AAACCA	1331	1351	Zea mays	cis-acting regulatory element essential for the anaerobic induction
GmCOMT30	ARE	AAACCA	1685	1705	Zea mays	cis-acting regulatory element essential for the anaerobic induction
GmCOMT30	MRE	AACCTAA	1509	1529	Petroselinum crispum	MYB binding site involved in light responsiveness
GmCOMT30	WRE3	CCACCT	1908	1928	Pisum sativum
GmCOMT30	GT1-motif	GGTTAA	251	271	Arabidopsis thaliana	light responsive element
GmCOMT30	GT1-motif	GGTTAA	1341	1361	Arabidopsis thaliana	light responsive element
GmCOMT30	GT1-motif	GGTTAAT	1506	1526	Avena sativa	light responsive element
GmCOMT30	GT1-motif	GGTTAA	1507	1527	Arabidopsis thaliana	light responsive element
GmCOMT30	ABRE	ACGTG	366	386	Arabidopsis thaliana	cis-acting element involved in the abscisic acid responsiveness
GmCOMT30	ABRE	ACGTG	1752	1772	Arabidopsis thaliana	cis-acting element involved in the abscisic acid responsiveness
GmCOMT30	ABRE	ACGTG	1889	1909	Arabidopsis thaliana	cis-acting element involved in the abscisic acid responsiveness
GmCOMT30	AE-box	AGAAACAA	174	194	Arabidopsis thaliana	part of a module for light response
GmCOMT30	CAAT-box	CAAT	1	21	Nicotiana glutinosa
GmCOMT30	CAAT-box	CAAT	43	63	Nicotiana glutinosa
GmCOMT30	CAAT-box	CAAT	48	68	Nicotiana glutinosa
GmCOMT30	CAAT-box	CAAT	439	459	Nicotiana glutinosa
GmCOMT30	CAAT-box	CAAAT	532	552	Pisum sativum	common cis-acting element in promoter and enhancer regions
GmCOMT30	CAAT-box	CAAT	547	567	Nicotiana glutinosa
GmCOMT30	CAAT-box	CAAT	799	819	Nicotiana glutinosa
GmCOMT30	CAAT-box	CAAT	981	1001	Nicotiana glutinosa
GmCOMT30	CAAT-box	CAAT	986	1006	Nicotiana glutinosa
GmCOMT30	CAAT-box	CAAT	1142	1162	Nicotiana glutinosa
GmCOMT30	CAAT-box	CAAT	1194	1214	Nicotiana glutinosa
GmCOMT30	CAAT-box	CAAAT	1388	1408	Pisum sativum	common cis-acting element in promoter and enhancer regions
GmCOMT30	CAAT-box	CAAAT	1404	1424	Pisum sativum	common cis-acting element in promoter and enhancer regions
GmCOMT30	CAAT-box	CAAT	1447	1467	Nicotiana glutinosa
GmCOMT30	CAAT-box	CAAT	1466	1486	Nicotiana glutinosa
GmCOMT30	CAAT-box	CAAT	1468	1488	Nicotiana glutinosa
GmCOMT30	CAAT-box	CAAT	1567	1587	Nicotiana glutinosa
GmCOMT30	CAAT-box	CCAAT	1609	1629	Arabidopsis thaliana	common cis-acting element in promoter and enhancer regions
GmCOMT30	CAAT-box	CAAT	1610	1630	Nicotiana glutinosa
GmCOMT30	CAAT-box	CAAT	1674	1694	Nicotiana glutinosa
GmCOMT30	CAAT-box	CAAAT	1689	1709	Pisum sativum	common cis-acting element in promoter and enhancer regions
GmCOMT30	CAAT-box	CAAAT	1692	1712	Pisum sativum	common cis-acting element in promoter and enhancer regions
GmCOMT30	CAAT-box	CAAT	1708	1728	Nicotiana glutinosa
GmCOMT30	CAAT-box	CAAAT	1810	1830	Pisum sativum	common cis-acting element in promoter and enhancer regions
GmCOMT30	CAAT-box	CAAT	1837	1857	Nicotiana glutinosa
GmCOMT30	CAAT-box	CAAT	1904	1924	Nicotiana glutinosa
GmCOMT30	CAAT-box	CAAT	1995	2015	Nicotiana glutinosa
GmCOMT30	AuxRR-core	GGTCCAT	585	605	Nicotiana tabacum	cis-acting regulatory element involved in auxin responsiveness
GmCOMT30	G-box	TAAACGTG	363	383	Brassica oleracea	cis-acting regulatory element involved in light responsiveness
GmCOMT30	G-box	TACGTG	1752	1772	Arabidopsis thaliana	cis-acting regulatory element involved in light responsiveness
GmCOMT30	G-box	TACGTG	1889	1909	Arabidopsis thaliana	cis-acting regulatory element involved in light responsiveness
GmCOMT30	O2-site	GATGATGTGG	148	168	Zea mays	cis-acting regulatory element involved in zein metabolism regulation
GmCOMT30	WUN-motif	TTATTACAT	1665	1685	Nicotiana glutinosa
GmCOMT30	TCA	TCATCTTCAT	32	52	Pisum sativum
GmCOMT30	TCT-motif	TCTTAC	329	349	Arabidopsis thaliana	part of a light responsive element
GmCOMT30	LTR	CCGAAA	1929	1949	Hordeum vulgare	cis-acting element involved in low-temperature responsiveness
GmCOMT30	Myb	TAACTG	858	878	Arabidopsis thaliana
GmCOMT30	Myb	TAACTG	1040	1060	Arabidopsis thaliana
GmCOMT30	Myb	TAACTG	1094	1114	Arabidopsis thaliana
GmCOMT30	Myc	TCTCTTA	330	350	Arabidopsis thaliana
GmCOMT30	TCA-element	CCATCTTTTT	428	448	Nicotiana tabacum	cis-acting element involved in salicylic acid responsiveness
GmCOMT30	Box 4	ATTAAT	28	48	Petroselinum crispum	part of a conserved DNA module involved in light responsiveness
GmCOMT30	Box 4	ATTAAT	190	210	Petroselinum crispum	part of a conserved DNA module involved in light responsiveness
GmCOMT30	Box 4	ATTAAT	793	813	Petroselinum crispum	part of a conserved DNA module involved in light responsiveness
GmCOMT30	Box 4	ATTAAT	1658	1678	Petroselinum crispum	part of a conserved DNA module involved in light responsiveness
GmCOMT30	Box 4	ATTAAT	1818	1838	Petroselinum crispum	part of a conserved DNA module involved in light responsiveness
GmCOMT32	G-Box	CACGTT	1344	1364	Pisum sativum	cis-acting regulatory element involved in light responsiveness
GmCOMT32	WRE3	CCACCT	1658	1678	Pisum sativum
GmCOMT32	chs-CMA1a	TTACTTAA	1382	1402	Daucus carota	part of a light responsive element
GmCOMT32	GCN4_motif	TGAGTCA	26	46	Oryza sativa	cis-regulatory element involved in endosperm expression
GmCOMT32	GCN4_motif	TGAGTCA	34	54	Oryza sativa	cis-regulatory element involved in endosperm expression
GmCOMT32	GA-motif	ATAGATAA	639	659	Arabidopsis thaliana	part of a light responsive element
GmCOMT32	Box 4	ATTAAT	404	424	Petroselinum crispum	part of a conserved DNA module involved in light responsiveness
GmCOMT32	Box 4	ATTAAT	408	428	Petroselinum crispum	part of a conserved DNA module involved in light responsiveness
GmCOMT32	Box 4	ATTAAT	515	535	Petroselinum crispum	part of a conserved DNA module involved in light responsiveness
GmCOMT32	Box 4	ATTAAT	1538	1558	Petroselinum crispum	part of a conserved DNA module involved in light responsiveness
GmCOMT32	ABRE	ACGTG	1345	1365	Arabidopsis thaliana	cis-acting element involved in the abscisic acid responsiveness
GmCOMT32	MRE	AACCTAA	1414	1434	Petroselinum crispum	MYB binding site involved in light responsiveness
GmCOMT32	MRE	AACCTAA	1526	1546	Petroselinum crispum	MYB binding site involved in light responsiveness
GmCOMT32	AuxRR-core	GGTCCAT	167	187	Nicotiana tabacum	cis-acting regulatory element involved in auxin responsiveness
GmCOMT32	MYB	CAACCA	69	89	Arabidopsis thaliana
GmCOMT32	MYB	TAACCA	246	266	Arabidopsis thaliana
GmCOMT32	MYB	TAACCA	337	357	Arabidopsis thaliana
GmCOMT32	MYB	CAACCA	1604	1624	Arabidopsis thaliana
GmCOMT32	CAAT-box	CAAT	32	52	Nicotiana glutinosa
GmCOMT32	CAAT-box	CAAT	119	139	Nicotiana glutinosa
GmCOMT32	CAAT-box	CAAT	161	181	Nicotiana glutinosa
GmCOMT32	CAAT-box	CAAT	174	194	Nicotiana glutinosa
GmCOMT32	CAAT-box	CAAT	186	206	Nicotiana glutinosa
GmCOMT32	CAAT-box	CAAT	188	208	Nicotiana glutinosa
GmCOMT32	CAAT-box	CAAT	232	252	Nicotiana glutinosa
GmCOMT32	CAAT-box	CAAAT	259	279	Pisum sativum	common cis-acting element in promoter and enhancer regions
GmCOMT32	CAAT-box	CAAT	272	292	Nicotiana glutinosa
GmCOMT32	CAAT-box	CAAAT	310	330	Pisum sativum	common cis-acting element in promoter and enhancer regions
GmCOMT32	CAAT-box	CCAAT	335	355	Arabidopsis thaliana	common cis-acting element in promoter and enhancer regions
GmCOMT32	CAAT-box	CAAAT	359	379	Pisum sativum	common cis-acting element in promoter and enhancer regions
GmCOMT32	CAAT-box	CAAAT	401	421	Pisum sativum	common cis-acting element in promoter and enhancer regions
GmCOMT32	CAAT-box	CCCAATTT	523	543	Arabidopsis thaliana	common cis-acting element in promoter and enhancer regions
GmCOMT32	CAAT-box	CCAAT	525	545	Arabidopsis thaliana	common cis-acting element in promoter and enhancer regions
GmCOMT32	CAAT-box	CAAAT	678	698	Pisum sativum	common cis-acting element in promoter and enhancer regions
GmCOMT32	CAAT-box	CAAT	749	769	Nicotiana glutinosa
GmCOMT32	CAAT-box	CAAT	756	776	Nicotiana glutinosa
GmCOMT32	CAAT-box	CAAT	758	778	Nicotiana glutinosa
GmCOMT32	CAAT-box	CAAT	817	837	Nicotiana glutinosa
GmCOMT32	CAAT-box	CAAT	870	890	Nicotiana glutinosa
GmCOMT32	CAAT-box	CAAAT	904	924	Pisum sativum	common cis-acting element in promoter and enhancer regions
GmCOMT32	CAAT-box	CAAAT	1016	1036	Pisum sativum	common cis-acting element in promoter and enhancer regions
GmCOMT32	CAAT-box	CAAAT	1111	1131	Pisum sativum	common cis-acting element in promoter and enhancer regions
GmCOMT32	CAAT-box	CAAAT	1128	1148	Pisum sativum	common cis-acting element in promoter and enhancer regions
GmCOMT32	CAAT-box	CAAT	1168	1188	Nicotiana glutinosa
GmCOMT32	CAAT-box	CAAT	1268	1288	Nicotiana glutinosa
GmCOMT32	CAAT-box	CCAAT	1281	1301	Arabidopsis thaliana	common cis-acting element in promoter and enhancer regions
GmCOMT32	CAAT-box	CAAT	1282	1302	Nicotiana glutinosa
GmCOMT32	CAAT-box	CAAAT	1286	1306	Pisum sativum	common cis-acting element in promoter and enhancer regions
GmCOMT32	CAAT-box	CAAAT	1302	1322	Pisum sativum	common cis-acting element in promoter and enhancer regions
GmCOMT32	CAAT-box	CAAAT	1334	1354	Pisum sativum	common cis-acting element in promoter and enhancer regions
GmCOMT32	CAAT-box	CAAAT	1350	1370	Pisum sativum	common cis-acting element in promoter and enhancer regions
GmCOMT32	CAAT-box	CAAAT	1477	1497	Pisum sativum	common cis-acting element in promoter and enhancer regions
GmCOMT32	CAAT-box	CAAT	1482	1502	Nicotiana glutinosa
GmCOMT32	CAAT-box	CAAT	1518	1538	Nicotiana glutinosa
GmCOMT32	CAAT-box	CAAAT	1556	1576	Pisum sativum	common cis-acting element in promoter and enhancer regions
GmCOMT32	CAAT-box	CCAAT	1564	1584	Arabidopsis thaliana	common cis-acting element in promoter and enhancer regions
GmCOMT32	CAAT-box	CAAT	1565	1585	Nicotiana glutinosa
GmCOMT32	CAAT-box	CAAT	1588	1608	Nicotiana glutinosa
GmCOMT32	CAAT-box	CAAT	1631	1651	Nicotiana glutinosa
GmCOMT32	CAAT-box	CCAAT	1636	1656	Arabidopsis thaliana	common cis-acting element in promoter and enhancer regions
GmCOMT32	CAAT-box	CAAT	1637	1657	Nicotiana glutinosa
GmCOMT32	CAAT-box	CAAT	1705	1725	Nicotiana glutinosa
GmCOMT32	CAAT-box	CAAAT	1724	1744	Pisum sativum	common cis-acting element in promoter and enhancer regions
GmCOMT32	CAAT-box	CCAAT	1779	1799	Arabidopsis thaliana	common cis-acting element in promoter and enhancer regions
GmCOMT32	CAAT-box	CAAT	1780	1800	Nicotiana glutinosa
GmCOMT32	CAAT-box	CAAT	1782	1802	Nicotiana glutinosa
GmCOMT32	CAAT-box	CAAT	1886	1906	Nicotiana glutinosa
GmCOMT32	TCT-motif	TCTTAC	1386	1406	Arabidopsis thaliana	part of a light responsive element
GmCOMT32	AT1-motif	AATTATTTTTTATT	1039	1059	Solanum tuberosum	part of a light responsive module
GmCOMT32	AE-box	AGAAACAA	680	700	Arabidopsis thaliana	part of a module for light response
GmCOMT32	AE-box	AGAAACTT	1828	1848	Arabidopsis thaliana	part of a module for light response
GmCOMT32	RY-element	CATGCATG	1815	1835	Helianthus annuus	cis-acting regulatory element involved in seed-specific regulation
GmCOMT32	W box	TTGACC	1519	1539	Arabidopsis thaliana
GmCOMT32	W box	TTGACC	1628	1648	Arabidopsis thaliana
GmCOMT32	TGACG-motif	TGACG	1147	1167	Hordeum vulgare	cis-acting regulatory element involved in the MeJA-responsiveness
GmCOMT32	G-box	TAAACGTG	1342	1362	Brassica oleracea	cis-acting regulatory element involved in light responsiveness
GmCOMT32	ARE	AAACCA	1378	1398	Zea mays	cis-acting regulatory element essential for the anaerobic induction
GmCOMT32	ARE	AAACCA	1947	1967	Zea mays	cis-acting regulatory element essential for the anaerobic induction
GmCOMT32	CGTCA-motif	CGTCA	1147	1167	Hordeum vulgare	cis-acting regulatory element involved in the MeJA-responsiveness
GmCOMT32	GT1-motif	GGTTAA	245	265	Arabidopsis thaliana	light responsive element
GmCOMT32	GT1-motif	GGTTAA	338	358	Arabidopsis thaliana	light responsive element
GmCOMT32	GT1-motif	GGTTAAT	1022	1042	Avena sativa	light responsive element
GmCOMT32	GT1-motif	GGTTAA	1023	1043	Arabidopsis thaliana	light responsive element
GmCOMT32	MYC	CAATTG	186	206	Arabidopsis thaliana
GmCOMT32	MYC	CATGTG	448	468	Arabidopsis thaliana
GmCOMT32	MYC	CAATTG	756	776	Arabidopsis thaliana
GmCOMT32	MYC	CATTTG	1724	1744	Arabidopsis thaliana
GmCOMT32	MYC	CAATTG	1780	1800	Arabidopsis thaliana
GmCOMT32	MYC	CATGTG	1879	1899	Arabidopsis thaliana
GmCOMT32	as-1	TGACG	1147	1167	Arabidopsis thaliana
GmCOMT31	ABRE	ACGTG	1345	1365	Arabidopsis thaliana	cis-acting element involved in the abscisic acid responsiveness
GmCOMT31	ERE	ATTTTAAA	339	359	Nicotiana glutinos
GmCOMT31	ERE	ATTTTAAA	410	430	Nicotiana glutinos
GmCOMT31	G-Box	CACGTT	1344	1364	Pisum sativum	cis-acting regulatory element involved in light responsiveness
GmCOMT31	WRE3	CCACCT	1658	1678	Pisum sativum
GmCOMT31	chs-CMA1a	TTACTTAA	1382	1402	Daucus carota	part of a light responsive element
GmCOMT31	GA-motif	ATAGATAA	639	659	Arabidopsis thaliana	part of a light responsive element
GmCOMT31	Box 4	ATTAAT	406	426	Petroselinum crispum	part of a conserved DNA module involved in light responsiveness
GmCOMT31	Box 4	ATTAAT	512	532	Petroselinum crispum	part of a conserved DNA module involved in light responsiveness
GmCOMT31	Box 4	ATTAAT	1538	1558	Petroselinum crispum	part of a conserved DNA module involved in light responsiveness
GmCOMT31	CGTCA-motif	CGTCA	1147	1167	Hordeum vulgare	cis-acting regulatory element involved in the MeJA-responsiveness
GmCOMT31	GT1-motif	GGTTAAT	1022	1042	Avena sativa	light responsive element
GmCOMT31	GT1-motif	GGTTAA	1023	1043	Arabidopsis thaliana	light responsive element
GmCOMT31	MYC	CAATTG	756	776	Arabidopsis thaliana
GmCOMT31	MYC	CATTTG	1724	1744	Arabidopsis thaliana
GmCOMT31	MYC	CAATTG	1780	1800	Arabidopsis thaliana
GmCOMT31	MYC	CATGTG	1879	1899	Arabidopsis thaliana
GmCOMT31	as-1	TGACG	1147	1167	Arabidopsis thaliana
GmCOMT31	MRE	AACCTAA	1414	1434	Petroselinum crispum	MYB binding site involved in light responsiveness
GmCOMT31	MRE	AACCTAA	1526	1546	Petroselinum crispum	MYB binding site involved in light responsiveness
GmCOMT31	MYB	CAACCA	1604	1624	Arabidopsis thaliana
GmCOMT31	CAAT-box	CAAAT	394	414	Pisum sativum	common cis-acting element in promoter and enhancer regions
GmCOMT31	CAAT-box	CAAT	443	463	Nicotiana glutinosa
GmCOMT31	CAAT-box	CAAAT	522	542	Pisum sativum	common cis-acting element in promoter and enhancer regions
GmCOMT31	CAAT-box	CAAAT	678	698	Pisum sativum	common cis-acting element in promoter and enhancer regions
GmCOMT31	CAAT-box	CAAT	749	769	Nicotiana glutinosa
GmCOMT31	CAAT-box	CAAT	756	776	Nicotiana glutinosa
GmCOMT31	CAAT-box	CAAT	758	778	Nicotiana glutinosa
GmCOMT31	CAAT-box	CAAT	817	837	Nicotiana glutinosa
GmCOMT31	CAAT-box	CAAT	870	890	Nicotiana glutinosa
GmCOMT31	CAAT-box	CAAAT	904	924	Pisum sativum	common cis-acting element in promoter and enhancer regions
GmCOMT31	CAAT-box	CAAAT	1016	1036	Pisum sativum	common cis-acting element in promoter and enhancer regions
GmCOMT31	CAAT-box	CAAAT	1111	1131	Pisum sativum	common cis-acting element in promoter and enhancer regions
GmCOMT31	CAAT-box	CAAAT	1128	1148	Pisum sativum	common cis-acting element in promoter and enhancer regions
GmCOMT31	CAAT-box	CAAT	1168	1188	Nicotiana glutinosa
GmCOMT31	CAAT-box	CAAT	1268	1288	Nicotiana glutinosa
GmCOMT31	CAAT-box	CCAAT	1281	1301	Arabidopsis thaliana	common cis-acting element in promoter and enhancer regions
GmCOMT31	CAAT-box	CAAT	1282	1302	Nicotiana glutinosa
GmCOMT31	CAAT-box	CAAAT	1286	1306	Pisum sativum	common cis-acting element in promoter and enhancer regions
GmCOMT31	CAAT-box	CAAAT	1302	1322	Pisum sativum	common cis-acting element in promoter and enhancer regions
GmCOMT31	CAAT-box	CAAAT	1334	1354	Pisum sativum	common cis-acting element in promoter and enhancer regions
GmCOMT31	CAAT-box	CAAAT	1350	1370	Pisum sativum	common cis-acting element in promoter and enhancer regions
GmCOMT31	CAAT-box	CAAAT	1477	1497	Pisum sativum	common cis-acting element in promoter and enhancer regions
GmCOMT31	CAAT-box	CAAT	1482	1502	Nicotiana glutinosa
GmCOMT31	CAAT-box	CAAT	1518	1538	Nicotiana glutinosa
GmCOMT31	CAAT-box	CAAAT	1556	1576	Pisum sativum	common cis-acting element in promoter and enhancer regions
GmCOMT31	CAAT-box	CCAAT	1564	1584	Arabidopsis thaliana	common cis-acting element in promoter and enhancer regions
GmCOMT31	CAAT-box	CAAT	1565	1585	Nicotiana glutinosa
GmCOMT31	CAAT-box	CAAT	1588	1608	Nicotiana glutinosa
GmCOMT31	CAAT-box	CAAT	1631	1651	Nicotiana glutinosa
GmCOMT31	CAAT-box	CCAAT	1636	1656	Arabidopsis thaliana	common cis-acting element in promoter and enhancer regions
GmCOMT31	CAAT-box	CAAT	1637	1657	Nicotiana glutinosa
GmCOMT31	CAAT-box	CAAT	1705	1725	Nicotiana glutinosa
GmCOMT31	CAAT-box	CAAAT	1724	1744	Pisum sativum	common cis-acting element in promoter and enhancer regions
GmCOMT31	CAAT-box	CCAAT	1779	1799	Arabidopsis thaliana	common cis-acting element in promoter and enhancer regions
GmCOMT31	CAAT-box	CAAT	1780	1800	Nicotiana glutinosa
GmCOMT31	CAAT-box	CAAT	1782	1802	Nicotiana glutinosa
GmCOMT31	CAAT-box	CAAT	1886	1906	Nicotiana glutinosa
GmCOMT31	TCT-motif	TCTTAC	1386	1406	Arabidopsis thaliana	part of a light responsive element
GmCOMT31	AT1-motif	AATTATTTTTTATT	1039	1059	Solanum tuberosum	part of a light responsive module
GmCOMT31	AE-box	AGAAACAA	680	700	Arabidopsis thaliana	part of a module for light response
GmCOMT31	AE-box	AGAAACTT	1828	1848	Arabidopsis thaliana	part of a module for light response
GmCOMT31	RY-element	CATGCATG	1815	1835	Helianthus annuus	cis-acting regulatory element involved in seed-specific regulation
GmCOMT31	W box	TTGACC	1519	1539	Arabidopsis thaliana
GmCOMT31	W box	TTGACC	1628	1648	Arabidopsis thaliana
GmCOMT31	TGACG-motif	TGACG	1147	1167	Hordeum vulgare	cis-acting regulatory element involved in the MeJA-responsiveness
GmCOMT31	G-box	TAAACGTG	1342	1362	Brassica oleracea	cis-acting regulatory element involved in light responsiveness
GmCOMT31	ARE	AAACCA	1378	1398	Zea mays	cis-acting regulatory element essential for the anaerobic induction
GmCOMT31	ARE	AAACCA	1947	1967	Zea mays	cis-acting regulatory element essential for the anaerobic induction
GmCOMT29	GT1-motif	GGTTAA	354	374	Arabidopsis thaliana	light responsive element
GmCOMT29	GT1-motif	GGTTAAT	489	509	Avena sativa	light responsive element
GmCOMT29	GT1-motif	GGTTAA	1485	1505	Arabidopsis thaliana	light responsive element
GmCOMT29	MYC	CATTTG	1599	1619	Arabidopsis thaliana
GmCOMT29	MYC	CATGTG	1870	1890	Arabidopsis thaliana
GmCOMT29	DRE1	ACCGAGA	640	660	Zea mays
GmCOMT29	as-1	TGACG	669	689	Arabidopsis thaliana
GmCOMT29	CGTCA-motif	CGTCA	669	689	Hordeum vulgare	cis-acting regulatory element involved in the MeJA-responsiveness
GmCOMT29	AE-box	AGAAACAA	789	809	Arabidopsis thaliana	part of a module for light response
GmCOMT29	ARE	AAACCA	1520	1540	Zea mays	cis-acting regulatory element essential for the anaerobic induction
GmCOMT29	TGACG-motif	TGACG	669	689	Hordeum vulgare	cis-acting regulatory element involved in the MeJA-responsiveness
GmCOMT29	MYB	TAACCA	353	373	Arabidopsis thaliana
GmCOMT29	MYB	TAACCA	495	515	Arabidopsis thaliana
GmCOMT29	MYB	TAACCA	518	538	Arabidopsis thaliana
GmCOMT29	MYB	CAACCA	900	920	Arabidopsis thaliana
GmCOMT29	MYB	TAACCA	1484	1504	Arabidopsis thaliana
GmCOMT29	MYB	CAACCA	1694	1714	Arabidopsis thaliana
GmCOMT29	MRE	AACCTAA	1885	1905	Petroselinum crispum	MYB binding site involved in light responsiveness
GmCOMT29	AACA_motif	TAACAAACTCCA	1579	1599	Oryza sativa	involved in endosperm-specific negative expression
GmCOMT29	TATC-box	TATCCCA	999	1019	Oryza sativa	cis-acting element involved in gibberellin-responsiveness
GmCOMT29	LTR	CCGAAA	1466	1486	Hordeum vulgare	cis-acting element involved in low-temperature responsiveness
GmCOMT29	CAAT-box	CAAAT	6	26	Pisum sativum	common cis-acting element in promoter and enhancer regions
GmCOMT29	CAAT-box	CAAT	43	63	Nicotiana glutinosa
GmCOMT29	CAAT-box	CCAAT	93	113	Arabidopsis thaliana	common cis-acting element in promoter and enhancer regions
GmCOMT29	CAAT-box	CAAT	406	426	Nicotiana glutinosa
GmCOMT29	CAAT-box	CAAT	426	446	Nicotiana glutinosa
GmCOMT29	CAAT-box	CAAT	432	452	Nicotiana glutinosa
GmCOMT29	CAAT-box	CAAT	443	463	Nicotiana glutinosa
GmCOMT29	CAAT-box	CAAT	457	477	Nicotiana glutinosa
GmCOMT29	CAAT-box	CCAAT	498	518	Arabidopsis thaliana	common cis-acting element in promoter and enhancer regions
GmCOMT29	CAAT-box	CAAT	499	519	Nicotiana glutinosa
GmCOMT29	CAAT-box	CCAAT	521	541	Arabidopsis thaliana	common cis-acting element in promoter and enhancer regions
GmCOMT29	CAAT-box	CAAT	522	542	Nicotiana glutinosa
GmCOMT29	CAAT-box	CAAT	546	566	Nicotiana glutinosa
GmCOMT29	CAAT-box	CAAAT	555	575	Pisum sativum	common cis-acting element in promoter and enhancer regions
GmCOMT29	CAAT-box	CAAT	625	645	Nicotiana glutinosa
GmCOMT29	CAAT-box	CAAAT	678	698	Pisum sativum	common cis-acting element in promoter and enhancer regions
GmCOMT29	CAAT-box	CAAAT	712	732	Pisum sativum	common cis-acting element in promoter and enhancer regions
GmCOMT29	CAAT-box	CAAT	736	756	Nicotiana glutinosa
GmCOMT29	CAAT-box	TGCCAAC	824	844	Petunia hybrida	common cis-acting element in promoter and enhancer regions
GmCOMT29	CAAT-box	CAAAT	833	853	Pisum sativum	common cis-acting element in promoter and enhancer regions
GmCOMT29	CAAT-box	CAAAT	836	856	Pisum sativum	common cis-acting element in promoter and enhancer regions
GmCOMT29	CAAT-box	CAAT	950	970	Nicotiana glutinosa
GmCOMT29	CAAT-box	CCAAT	1056	1076	Arabidopsis thaliana	common cis-acting element in promoter and enhancer regions
GmCOMT29	CAAT-box	CAAAT	1071	1091	Pisum sativum	common cis-acting element in promoter and enhancer regions
GmCOMT29	CAAT-box	CAAT	1102	1122	Nicotiana glutinosa
GmCOMT29	CAAT-box	CAAAT	1110	1130	Pisum sativum	common cis-acting element in promoter and enhancer regions
GmCOMT29	CAAT-box	CAAT	1115	1135	Nicotiana glutinosa
GmCOMT29	CAAT-box	CAAAT	1215	1235	Pisum sativum	common cis-acting element in promoter and enhancer regions
GmCOMT29	CAAT-box	CAAT	1319	1339	Nicotiana glutinosa
GmCOMT29	CAAT-box	CAAT	1382	1402	Nicotiana glutinosa
GmCOMT29	CAAT-box	CAAAT	1515	1535	Pisum sativum	common cis-acting element in promoter and enhancer regions
GmCOMT29	CAAT-box	CCAAT	1518	1538	Arabidopsis thaliana	common cis-acting element in promoter and enhancer regions
GmCOMT29	CAAT-box	CAACCAACTCC	1579	1599	Arabidopsis thaliana	common cis-acting element in promoter and enhancer regions
GmCOMT29	CAAT-box	CAAAT	1600	1620	Pisum sativum	common cis-acting element in promoter and enhancer regions
GmCOMT29	CAAT-box	CAAT	1633	1653	Nicotiana glutinosa
GmCOMT29	CAAT-box	CAAT	1655	1675	Nicotiana glutinosa
GmCOMT29	ATCT-motif	AATCTAATCC	1882	1902	Pisum sativum	part of a conserved DNA module involved in light responsiveness
GmCOMT29	O2-site	GATGACATGG	1816	1836	Zea mays	cis-acting regulatory element involved in zein metabolism regulation
GmCOMT29	chs-CMA2a	TCACTTGA	1953	1973	Petroselinum crispum	part of a light responsive element
GmCOMT29	Myb	CAACTG	927	947	Arabidopsis thaliana
GmCOMT29	I-box	TGATAATGT	1117	1137	Solanum tuberosum	part of a light responsive element
GmCOMT29	GC-motif	CCCCCG	1496	1516	Zea mays	enhancer-like element involved in anoxic specific inducibility
GmCOMT29	MBS	CAACTG	927	947	Arabidopsis thaliana	MYB binding site involved in drought-inducibility
GmCOMT29	Box 4	ATTAAT	183	203	Petroselinum crispum	part of a conserved DNA module involved in light responsiveness
GmCOMT29	Box 4	ATTAAT	1106	1126	Petroselinum crispum	part of a conserved DNA module involved in light responsiveness
GmCOMT29	Box 4	ATTAAT	1165	1185	Petroselinum crispum	part of a conserved DNA module involved in light responsiveness
GmCOMT29	Box 4	ATTAAT	1367	1387	Petroselinum crispum	part of a conserved DNA module involved in light responsiveness
GmCOMT29	Box 4	ATTAAT	1421	1441	Petroselinum crispum	part of a conserved DNA module involved in light responsiveness
GmCOMT29	ERE	ATTTTAAA	1177	1197	Nicotiana glutinos
GmCOMT29	ERE	ATTTTAAA	1240	1260	Nicotiana glutinos
GmCOMT29	ERE	ATTTTAAA	1307	1327	Nicotiana glutinos
GmCOMT29	WRE3	CCACCT	1908	1928	Pisum sativum
GmCOMT29	WRE3	CCACCT	1917	1937	Pisum sativum
GmCOMT36	Myb	TAACTG	910	930	Arabidopsis thaliana
GmCOMT36	TCA-element	CCATCTTTTT	578	598	Nicotiana tabacum	cis-acting element involved in salicylic acid responsiveness
GmCOMT36	ABRE	CACGTG	226	246	Arabidopsis thaliana	cis-acting element involved in the abscisic acid responsiveness
GmCOMT36	ABRE	ACGTG	227	247	Arabidopsis thaliana	cis-acting element involved in the abscisic acid responsiveness
GmCOMT36	ABRE	ACGTG	318	338	Arabidopsis thaliana	cis-acting element involved in the abscisic acid responsiveness
GmCOMT36	Box 4	ATTAAT	654	674	Petroselinum crispum	part of a conserved DNA module involved in light responsiveness
GmCOMT36	Box 4	ATTAAT	691	711	Petroselinum crispum	part of a conserved DNA module involved in light responsiveness
GmCOMT36	Box 4	ATTAAT	852	872	Petroselinum crispum	part of a conserved DNA module involved in light responsiveness
GmCOMT36	Box 4	ATTAAT	878	898	Petroselinum crispum	part of a conserved DNA module involved in light responsiveness
GmCOMT36	Box 4	ATTAAT	1155	1175	Petroselinum crispum	part of a conserved DNA module involved in light responsiveness
GmCOMT36	Box 4	ATTAAT	1584	1604	Petroselinum crispum	part of a conserved DNA module involved in light responsiveness
GmCOMT36	MSA-like	(T/C)C(T/C)AACGG(T/C)(T/C)A	55	75	Catharanthus roseus	cis-acting element involved in cell cycle regulation
GmCOMT36	G-Box	CACGTG	226	246	Pisum sativum	cis-acting regulatory element involved in light responsiveness
GmCOMT36	ERE	ATTTTAAA	1594	1614	Nicotiana glutinos
GmCOMT36	ERE	ATTTTAAA	1735	1755	Nicotiana glutinos
GmCOMT36	TCA	TCATCTTCAT	37	57	Pisum sativum
GmCOMT36	3-AF1 binding site	TAAGAGAGGAA	421	441	Solanum tuberosum	light responsive element
GmCOMT36	WRE3	CCACCT	1041	1061	Pisum sativum
GmCOMT36	CCAAT-box	CAACGG	58	78	Hordeum vulgare	MYBHv1 binding site
GmCOMT36	CCAAT-box	CAACGG	77	97	Hordeum vulgare	MYBHv1 binding site
GmCOMT36	MYC	CATGTG	1646	1666	Arabidopsis thaliana
GmCOMT36	GT1-motif	GGTTAA	1893	1913	Arabidopsis thaliana	light responsive element
GmCOMT36	WUN-motif	AAATTACTA	682	702	Nicotiana glutinosa
GmCOMT36	WUN-motif	AAATTTCTT	1936	1956	Nicotiana glutinosa
GmCOMT36	AE-box	AGAAACAA	1854	1874	Arabidopsis thaliana	part of a module for light response
GmCOMT36	ARE	AAACCA	1319	1339	Zea mays	cis-acting regulatory element essential for the anaerobic induction
GmCOMT36	G-box	CACGTG	226	246	Arabidopsis thaliana	cis-acting regulatory element involved in light responsiveness
GmCOMT36	G-box	TACGTG	318	338	Arabidopsis thaliana	cis-acting regulatory element involved in light responsiveness
GmCOMT36	G-box	TAACACGTAG	1704	1724	Brassica oleracea	cis-acting regulatory element involved in light responsiveness
GmCOMT36	W box	TTGACC	842	862	Arabidopsis thaliana
GmCOMT36	MYB	CAACCA	235	255	Arabidopsis thaliana
GmCOMT36	MYB	CAACCA	461	481	Arabidopsis thaliana
GmCOMT36	MYB	CAACCA	623	643	Arabidopsis thaliana
GmCOMT36	MYB	TAACCA	930	950	Arabidopsis thaliana
GmCOMT36	MYB	TAACCA	976	996	Arabidopsis thaliana
GmCOMT36	MRE	AACCTAA	638	658	Petroselinum crispum	MYB binding site involved in light responsiveness
GmCOMT36	MRE	AACCTAA	1670	1690	Petroselinum crispum	MYB binding site involved in light responsiveness
GmCOMT36	CAAT-box	CCAAT	34	54	Arabidopsis thaliana	common cis-acting element in promoter and enhancer regions
GmCOMT36	CAAT-box	CAAT	35	55	Nicotiana glutinosa
GmCOMT36	CAAT-box	CCAAT	65	85	Arabidopsis thaliana	common cis-acting element in promoter and enhancer regions
GmCOMT36	CAAT-box	CAAT	402	422	Nicotiana glutinosa
GmCOMT36	CAAT-box	CAAT	414	434	Nicotiana glutinosa
GmCOMT36	CAAT-box	CCAAT	431	451	Arabidopsis thaliana	common cis-acting element in promoter and enhancer regions
GmCOMT36	CAAT-box	CCAAT	436	456	Arabidopsis thaliana	common cis-acting element in promoter and enhancer regions
GmCOMT36	CAAT-box	CCAAT	722	742	Arabidopsis thaliana	common cis-acting element in promoter and enhancer regions
GmCOMT36	CAAT-box	CAAT	841	861	Nicotiana glutinosa
GmCOMT36	CAAT-box	CAAAT	868	888	Pisum sativum	common cis-acting element in promoter and enhancer regions
GmCOMT36	CAAT-box	CAAT	903	923	Nicotiana glutinosa
GmCOMT36	CAAT-box	CAAT	1022	1042	Nicotiana glutinosa
GmCOMT36	CAAT-box	CAAT	1153	1173	Nicotiana glutinosa
GmCOMT36	CAAT-box	CAAT	1235	1255	Nicotiana glutinosa
GmCOMT36	CAAT-box	CAAT	1286	1306	Nicotiana glutinosa
GmCOMT36	CAAT-box	CAAT	1302	1322	Nicotiana glutinosa
GmCOMT36	CAAT-box	CAAAT	1354	1374	Pisum sativum	common cis-acting element in promoter and enhancer regions
GmCOMT36	CAAT-box	CAAT	1374	1394	Nicotiana glutinosa
GmCOMT36	CAAT-box	CAAT	1391	1411	Nicotiana glutinosa
GmCOMT36	CAAT-box	CAAT	1400	1420	Nicotiana glutinosa
GmCOMT36	CAAT-box	CCAAT	1438	1458	Arabidopsis thaliana	common cis-acting element in promoter and enhancer regions
GmCOMT36	CAAT-box	CCAAT	1449	1469	Arabidopsis thaliana	common cis-acting element in promoter and enhancer regions
GmCOMT36	CAAT-box	CAAT	1450	1470	Nicotiana glutinosa
GmCOMT36	CAAT-box	CAAT	1506	1526	Nicotiana glutinosa
GmCOMT36	CAAT-box	CCAAT	1552	1572	Arabidopsis thaliana	common cis-acting element in promoter and enhancer regions
GmCOMT36	CAAT-box	CAAT	1553	1573	Nicotiana glutinosa
GmCOMT36	CAAT-box	CAAT	1641	1661	Nicotiana glutinosa
GmCOMT36	CAAT-box	CAAT	1658	1678	Nicotiana glutinosa
GmCOMT36	CAAT-box	CAAAT	1762	1782	Pisum sativum	common cis-acting element in promoter and enhancer regions
GmCOMT36	CAAT-box	CAAT	1772	1792	Nicotiana glutinosa
GmCOMT36	CAAT-box	CAAT	1826	1846	Nicotiana glutinosa
GmCOMT36	CAAT-box	CAAAT	1859	1879	Pisum sativum	common cis-acting element in promoter and enhancer regions
GmCOMT36	CAAT-box	CAAAT	1967	1987	Pisum sativum	common cis-acting element in promoter and enhancer regions
GmCOMT5	HD-Zip 1	CAAT(A/T)ATTG	1562	1582	Arabidopsis thaliana	element involved in differentiation of the palisade mesophyll cells
GmCOMT5	Box 4	ATTAAT	54	74	Petroselinum crispum	part of a conserved DNA module involved in light responsiveness
GmCOMT5	Box 4	ATTAAT	352	372	Petroselinum crispum	part of a conserved DNA module involved in light responsiveness
GmCOMT5	Box 4	ATTAAT	957	977	Petroselinum crispum	part of a conserved DNA module involved in light responsiveness
GmCOMT5	as-1	TGACG	299	319	Arabidopsis thaliana
GmCOMT5	MYC	CATGTG	756	776	Arabidopsis thaliana
GmCOMT5	MYC	CATGTG	1519	1539	Arabidopsis thaliana
GmCOMT5	STRE	AGGGG	1035	1055	Arabidopsis thaliana
GmCOMT5	Myc	TCTCTTA	906	926	Arabidopsis thaliana
GmCOMT5	Myc	TCTCTTA	1219	1239	Arabidopsis thaliana
GmCOMT5	WUN-motif	AAATTTCTT	591	611	Nicotiana glutinosa
GmCOMT5	WUN-motif	AAATTACT	1412	1432	Nicotiana glutinosa
GmCOMT5	CGTCA-motif	CGTCA	299	319	Hordeum vulgare	cis-acting regulatory element involved in the MeJA-responsiveness
GmCOMT5	TGACG-motif	TGACG	299	319	Hordeum vulgare	cis-acting regulatory element involved in the MeJA-responsiveness
GmCOMT5	ARE	AAACCA	127	147	Zea mays	cis-acting regulatory element essential for the anaerobic induction
GmCOMT5	ARE	AAACCA	514	534	Zea mays	cis-acting regulatory element essential for the anaerobic induction
GmCOMT5	GARE-motif	TCTGTTG	234	254	Brassica oleracea	gibberellin-responsive element
GmCOMT5	CAT-box	GCCACT	1554	1574	Arabidopsis thaliana	cis-acting regulatory element related to meristem expression
GmCOMT5	CAT-box	GCCACT	1903	1923	Arabidopsis thaliana	cis-acting regulatory element related to meristem expression
GmCOMT5	CAAT-box	CCAAT	37	57	Arabidopsis thaliana	common cis-acting element in promoter and enhancer regions
GmCOMT5	CAAT-box	CAAT	38	58	Nicotiana glutinosa
GmCOMT5	CAAT-box	CAAT	46	66	Nicotiana glutinosa
GmCOMT5	CAAT-box	CAAAT	166	186	Pisum sativum	common cis-acting element in promoter and enhancer regions
GmCOMT5	CAAT-box	CAAT	220	240	Nicotiana glutinosa
GmCOMT5	CAAT-box	CAAT	346	366	Nicotiana glutinosa
GmCOMT5	CAAT-box	CAAT	423	443	Nicotiana glutinosa
GmCOMT5	CAAT-box	CAAAT	611	631	Pisum sativum	common cis-acting element in promoter and enhancer regions
GmCOMT5	CAAT-box	CAAAT	641	661	Pisum sativum	common cis-acting element in promoter and enhancer regions
GmCOMT5	CAAT-box	CAAAT	657	677	Pisum sativum	common cis-acting element in promoter and enhancer regions
GmCOMT5	CAAT-box	CAAT	680	700	Nicotiana glutinosa
GmCOMT5	CAAT-box	CAAT	692	712	Nicotiana glutinosa
GmCOMT5	CAAT-box	CAAT	747	767	Nicotiana glutinosa
GmCOMT5	CAAT-box	CAAAT	801	821	Pisum sativum	common cis-acting element in promoter and enhancer regions
GmCOMT5	CAAT-box	CAAT	845	865	Nicotiana glutinosa
GmCOMT5	CAAT-box	CAAT	860	880	Nicotiana glutinosa
GmCOMT5	CAAT-box	CAAT	1075	1095	Nicotiana glutinosa
GmCOMT5	CAAT-box	AGCTCAATTTCA	1077	1097	Daucus carota	common cis-acting element in promoter and enhancer regions
GmCOMT5	CAAT-box	CAAT	1081	1101	Nicotiana glutinosa
GmCOMT5	CAAT-box	CAAT	1117	1137	Nicotiana glutinosa
GmCOMT5	CAAT-box	CAAAT	1141	1161	Pisum sativum	common cis-acting element in promoter and enhancer regions
GmCOMT5	CAAT-box	CAAT	1174	1194	Nicotiana glutinosa
GmCOMT5	CAAT-box	CAAAT	1234	1254	Pisum sativum	common cis-acting element in promoter and enhancer regions
GmCOMT5	CAAT-box	CAAAT	1307	1327	Pisum sativum	common cis-acting element in promoter and enhancer regions
GmCOMT5	CAAT-box	CAAT	1398	1418	Nicotiana glutinosa
GmCOMT5	CAAT-box	CAAT	1472	1492	Nicotiana glutinosa
GmCOMT5	CAAT-box	CAAT	1496	1516	Nicotiana glutinosa
GmCOMT5	CAAT-box	CAAAT	1509	1529	Pisum sativum	common cis-acting element in promoter and enhancer regions
GmCOMT5	CAAT-box	CAAAT	1512	1532	Pisum sativum	common cis-acting element in promoter and enhancer regions
GmCOMT5	CAAT-box	CAAT	1532	1552	Nicotiana glutinosa
GmCOMT5	CAAT-box	CAAT	1545	1565	Nicotiana glutinosa
GmCOMT5	CAAT-box	CAAT	1562	1582	Nicotiana glutinosa
GmCOMT5	CAAT-box	CAAT	1567	1587	Nicotiana glutinosa
GmCOMT5	CAAT-box	CAAT	1624	1644	Nicotiana glutinosa
GmCOMT5	CAAT-box	CAAAT	1696	1716	Pisum sativum	common cis-acting element in promoter and enhancer regions
GmCOMT5	CAAT-box	CCAAT	1712	1732	Arabidopsis thaliana	common cis-acting element in promoter and enhancer regions
GmCOMT5	CAAT-box	CAAT	1713	1733	Nicotiana glutinosa
GmCOMT5	CAAT-box	CAAAT	1721	1741	Pisum sativum	common cis-acting element in promoter and enhancer regions
GmCOMT5	CAAT-box	CAAAT	1746	1766	Pisum sativum	common cis-acting element in promoter and enhancer regions
GmCOMT5	CAAT-box	CCAAT	1931	1951	Arabidopsis thaliana	common cis-acting element in promoter and enhancer regions
GmCOMT5	CAAT-box	CAAT	1932	1952	Nicotiana glutinosa
GmCOMT5	CAAT-box	CCAAT	1973	1993	Arabidopsis thaliana	common cis-acting element in promoter and enhancer regions
GmCOMT5	CAAT-box	CAAT	1974	1994	Nicotiana glutinosa
GmCOMT5	LTR	CCGAAA	1631	1651	Hordeum vulgare	cis-acting element involved in low-temperature responsiveness
GmCOMT5	TCT-motif	TCTTAC	855	875	Arabidopsis thaliana	part of a light responsive element
GmCOMT5	TCT-motif	TCTTAC	1221	1241	Arabidopsis thaliana	part of a light responsive element
GmCOMT5	TCT-motif	TCTTAC	1313	1333	Arabidopsis thaliana	part of a light responsive element
GmCOMT5	GATA-motif	GATAGGA	868	888	Arabidopsis thaliana	part of a light responsive element
GmCOMT5	MYB	CAACAG	234	254	Arabidopsis thaliana
GmCOMT5	MYB	CAACCA	669	689	Arabidopsis thaliana
GmCOMT5	MYB	CAACCA	1854	1874	Arabidopsis thaliana
GmCOMT46	AT1-motif	AATTATTTTTTATT	943	963	Solanum tuberosum	part of a light responsive module
GmCOMT46	AT1-motif	AATTATTTTTTATT	1682	1702	Solanum tuberosum	part of a light responsive module
GmCOMT46	ARE	AAACCA	211	231	Zea mays	cis-acting regulatory element essential for the anaerobic induction
GmCOMT46	ARE	AAACCA	797	817	Zea mays	cis-acting regulatory element essential for the anaerobic induction
GmCOMT46	ARE	AAACCA	1900	1920	Zea mays	cis-acting regulatory element essential for the anaerobic induction
GmCOMT46	G-box	CACGTG	5	25	Arabidopsis thaliana	cis-acting regulatory element involved in light responsiveness
GmCOMT46	G-box	TACGTG	122	142	Arabidopsis thaliana	cis-acting regulatory element involved in light responsiveness
GmCOMT46	W box	TTGACC	773	793	Arabidopsis thaliana
GmCOMT46	MYB	CAACCA	1977	1997	Arabidopsis thaliana
GmCOMT46	GATA-motif	AAGATAAGATT	865	885	Arabidopsis thaliana	part of a light responsive element
GmCOMT46	GATA-motif	AAGATAAGATT	920	940	Arabidopsis thaliana	part of a light responsive element
GmCOMT46	TCT-motif	TCTTAC	1089	1109	Arabidopsis thaliana	part of a light responsive element
GmCOMT46	CAAT-box	CAAAT	73	93	Pisum sativum	common cis-acting element in promoter and enhancer regions
GmCOMT46	CAAT-box	CAAT	171	191	Nicotiana glutinosa
GmCOMT46	CAAT-box	CCAAT	214	234	Arabidopsis thaliana	common cis-acting element in promoter and enhancer regions
GmCOMT46	CAAT-box	CAAT	215	235	Nicotiana glutinosa
GmCOMT46	CAAT-box	CAAT	379	399	Nicotiana glutinosa
GmCOMT46	CAAT-box	CCAAT	545	565	Arabidopsis thaliana	common cis-acting element in promoter and enhancer regions
GmCOMT46	CAAT-box	CAAT	546	566	Nicotiana glutinosa
GmCOMT46	CAAT-box	CAAT	590	610	Nicotiana glutinosa
GmCOMT46	CAAT-box	CAAAT	624	644	Pisum sativum	common cis-acting element in promoter and enhancer regions
GmCOMT46	CAAT-box	CCAAT	655	675	Arabidopsis thaliana	common cis-acting element in promoter and enhancer regions
GmCOMT46	CAAT-box	CAAAT	710	730	Pisum sativum	common cis-acting element in promoter and enhancer regions
GmCOMT46	CAAT-box	CCCAATTT	767	787	Arabidopsis thaliana	common cis-acting element in promoter and enhancer regions
GmCOMT46	CAAT-box	CCAAT	769	789	Arabidopsis thaliana	common cis-acting element in promoter and enhancer regions
GmCOMT46	CAAT-box	CAAT	856	876	Nicotiana glutinosa
GmCOMT46	CAAT-box	CAAAT	994	1014	Pisum sativum	common cis-acting element in promoter and enhancer regions
GmCOMT46	CAAT-box	CAAT	1020	1040	Nicotiana glutinosa
GmCOMT46	CAAT-box	CAAT	1031	1051	Nicotiana glutinosa
GmCOMT46	CAAT-box	CAAT	1033	1053	Nicotiana glutinosa
GmCOMT46	CAAT-box	CAAT	1118	1138	Nicotiana glutinosa
GmCOMT46	CAAT-box	CAAT	1157	1177	Nicotiana glutinosa
GmCOMT46	CAAT-box	CAAAT	1204	1224	Pisum sativum	common cis-acting element in promoter and enhancer regions
GmCOMT46	CAAT-box	CAAAT	1219	1239	Pisum sativum	common cis-acting element in promoter and enhancer regions
GmCOMT46	CAAT-box	CAAAT	1222	1242	Pisum sativum	common cis-acting element in promoter and enhancer regions
GmCOMT46	CAAT-box	CAAAT	1264	1284	Pisum sativum	common cis-acting element in promoter and enhancer regions
GmCOMT46	CAAT-box	CAAAT	1272	1292	Pisum sativum	common cis-acting element in promoter and enhancer regions
GmCOMT46	CAAT-box	CAAT	1275	1295	Nicotiana glutinosa
GmCOMT46	CAAT-box	CCAAT	1321	1341	Arabidopsis thaliana	common cis-acting element in promoter and enhancer regions
GmCOMT46	CAAT-box	CAAT	1322	1342	Nicotiana glutinosa
GmCOMT46	CAAT-box	CAAAT	1324	1344	Pisum sativum	common cis-acting element in promoter and enhancer regions
GmCOMT46	CAAT-box	CAAT	1329	1349	Nicotiana glutinosa
GmCOMT46	CAAT-box	CCAAT	1337	1357	Arabidopsis thaliana	common cis-acting element in promoter and enhancer regions
GmCOMT46	CAAT-box	CAAT	1338	1358	Nicotiana glutinosa
GmCOMT46	CAAT-box	CAAT	1349	1369	Nicotiana glutinosa
GmCOMT46	CAAT-box	CCAAT	1390	1410	Arabidopsis thaliana	common cis-acting element in promoter and enhancer regions
GmCOMT46	CAAT-box	CAAT	1391	1411	Nicotiana glutinosa
GmCOMT46	CAAT-box	CAAT	1393	1413	Nicotiana glutinosa
GmCOMT46	CAAT-box	CCAAT	1401	1421	Arabidopsis thaliana	common cis-acting element in promoter and enhancer regions
GmCOMT46	CAAT-box	CAAAT	1413	1433	Pisum sativum	common cis-acting element in promoter and enhancer regions
GmCOMT46	CAAT-box	CAAT	1433	1453	Nicotiana glutinosa
GmCOMT46	CAAT-box	CAAAT	1435	1455	Pisum sativum	common cis-acting element in promoter and enhancer regions
GmCOMT46	CAAT-box	CAAT	1464	1484	Nicotiana glutinosa
GmCOMT46	CAAT-box	CAAT	1540	1560	Nicotiana glutinosa
GmCOMT46	CAAT-box	CCAAT	1605	1625	Arabidopsis thaliana	common cis-acting element in promoter and enhancer regions
GmCOMT46	CAAT-box	CAAT	1606	1626	Nicotiana glutinosa
GmCOMT46	CAAT-box	CAAT	1722	1742	Nicotiana glutinosa
GmCOMT46	CAAT-box	CAAT	1728	1748	Nicotiana glutinosa
GmCOMT46	CAAT-box	CCAAT	1789	1809	Arabidopsis thaliana	common cis-acting element in promoter and enhancer regions
GmCOMT46	CAAT-box	CAAT	1790	1810	Nicotiana glutinosa
GmCOMT46	CAAT-box	CAAT	1798	1818	Nicotiana glutinosa
GmCOMT46	CAAT-box	CAAAT	1803	1823	Pisum sativum	common cis-acting element in promoter and enhancer regions
GmCOMT46	CAAT-box	CAAT	1842	1862	Nicotiana glutinosa
GmCOMT46	CAAT-box	CAAT	1894	1914	Nicotiana glutinosa
GmCOMT46	MYC	CAATTG	1031	1051	Arabidopsis thaliana
GmCOMT46	MYC	CAATTG	1391	1411	Arabidopsis thaliana
GmCOMT46	circadian	CAAAGATATC	998	1018	Lycopersicon esculentum	cis-acting regulatory element involved in circadian control
GmCOMT46	Myc	TCTCTTA	559	579	Arabidopsis thaliana
GmCOMT46	GCN4_motif	TGAGTCA	1395	1415	Oryza sativa	cis-regulatory element involved in endosperm expression
GmCOMT46	Box 4	ATTAAT	1794	1814	Petroselinum crispum	part of a conserved DNA module involved in light responsiveness
GmCOMT46	G-Box	CACGTG	5	25	Pisum sativum	cis-acting regulatory element involved in light responsiveness
GmCOMT46	G-Box	CACGTT	82	102	Pisum sativum	cis-acting regulatory element involved in light responsiveness
GmCOMT46	ERE	ATTTTAAA	194	214	Nicotiana glutinos
GmCOMT46	ERE	ATTTTAAA	1065	1085	Nicotiana glutinos
GmCOMT46	ERE	ATTTTAAA	1624	1644	Nicotiana glutinos
GmCOMT46	TCA	TCATCTTCAT	924	944	Pisum sativum
GmCOMT46	TCCC-motif	TCTCCCT	301	321	Spinacia oleracea	part of a light responsive element
GmCOMT46	ABRE	CACGTG	5	25	Arabidopsis thaliana	cis-acting element involved in the abscisic acid responsiveness
GmCOMT46	ABRE	ACGTG	6	26	Arabidopsis thaliana	cis-acting element involved in the abscisic acid responsiveness
GmCOMT46	ABRE	ACGTG	83	103	Arabidopsis thaliana	cis-acting element involved in the abscisic acid responsiveness
GmCOMT46	ABRE	CGTACGTGCA	120	140	Hordeum vulgare	cis-acting element involved in the abscisic acid responsiveness
GmCOMT46	ABRE	ACGTG	123	143	Arabidopsis thaliana	cis-acting element involved in the abscisic acid responsiveness
GmCOMT46	TCA-element	CCATCTTTTT	149	169	Nicotiana tabacum	cis-acting element involved in salicylic acid responsiveness
GmCOMT46	TCA-element	CCATCTTTTT	1230	1250	Nicotiana tabacum	cis-acting element involved in salicylic acid responsiveness
GmCOMT18	ERE	ATTTCATA	185	205	Nicotiana glutinos
GmCOMT18	ERE	ATTTTAAA	459	479	Nicotiana glutinos
GmCOMT18	ERE	ATTTTAAA	1492	1512	Nicotiana glutinos
GmCOMT18	TC-rich repeats	GTTTTCTTAC	1527	1547	Nicotiana tabacum	cis-acting element involved in defense and stress responsiveness
GmCOMT18	CCAAT-box	CAACGG	1629	1649	Hordeum vulgare	MYBHv1 binding site
GmCOMT18	chs-CMA1a	TTACTTAA	1533	1553	Daucus carota	part of a light responsive element
GmCOMT18	GA-motif	ATAGATAA	655	675	Arabidopsis thaliana	part of a light responsive element
GmCOMT18	GA-motif	ATAGATAA	1231	1251	Arabidopsis thaliana	part of a light responsive element
GmCOMT18	Box 4	ATTAAT	263	283	Petroselinum crispum	part of a conserved DNA module involved in light responsiveness
GmCOMT18	Box 4	ATTAAT	449	469	Petroselinum crispum	part of a conserved DNA module involved in light responsiveness
GmCOMT18	Box 4	ATTAAT	822	842	Petroselinum crispum	part of a conserved DNA module involved in light responsiveness
GmCOMT18	Box 4	ATTAAT	883	903	Petroselinum crispum	part of a conserved DNA module involved in light responsiveness
GmCOMT18	Box 4	ATTAAT	1264	1284	Petroselinum crispum	part of a conserved DNA module involved in light responsiveness
GmCOMT18	Box 4	ATTAAT	1479	1499	Petroselinum crispum	part of a conserved DNA module involved in light responsiveness
GmCOMT18	Box 4	ATTAAT	1942	1962	Petroselinum crispum	part of a conserved DNA module involved in light responsiveness
GmCOMT18	TCA-element	CCATCTTTTT	775	795	Nicotiana tabacum	cis-acting element involved in salicylic acid responsiveness
GmCOMT18	MYB	TAACCA	108	128	Arabidopsis thaliana
GmCOMT18	MYB	TAACCA	581	601	Arabidopsis thaliana
GmCOMT18	GATA-motif	AAGATAAGATT	1101	1121	Arabidopsis thaliana	part of a light responsive element
GmCOMT18	CAAT-box	CAAT	10	30	Nicotiana glutinosa
GmCOMT18	CAAT-box	CAAT	21	41	Nicotiana glutinosa
GmCOMT18	CAAT-box	CAAAT	80	100	Pisum sativum	common cis-acting element in promoter and enhancer regions
GmCOMT18	CAAT-box	CAAT	170	190	Nicotiana glutinosa
GmCOMT18	CAAT-box	CAAT	439	459	Nicotiana glutinosa
GmCOMT18	CAAT-box	CAAAT	553	573	Pisum sativum	common cis-acting element in promoter and enhancer regions
GmCOMT18	CAAT-box	CAAT	568	588	Nicotiana glutinosa
GmCOMT18	CAAT-box	CCAAT	788	808	Arabidopsis thaliana	common cis-acting element in promoter and enhancer regions
GmCOMT18	CAAT-box	CAAT	789	809	Nicotiana glutinosa
GmCOMT18	CAAT-box	CAAT	813	833	Nicotiana glutinosa
GmCOMT18	CAAT-box	CAAT	874	894	Nicotiana glutinosa
GmCOMT18	CAAT-box	CAAT	959	979	Nicotiana glutinosa
GmCOMT18	CAAT-box	CAAAT	1035	1055	Pisum sativum	common cis-acting element in promoter and enhancer regions
GmCOMT18	CAAT-box	CAAT	1042	1062	Nicotiana glutinosa
GmCOMT18	CAAT-box	CAAAT	1127	1147	Pisum sativum	common cis-acting element in promoter and enhancer regions
GmCOMT18	CAAT-box	CAAAT	1132	1152	Pisum sativum	common cis-acting element in promoter and enhancer regions
GmCOMT18	CAAT-box	CAAT	1225	1245	Nicotiana glutinosa
GmCOMT18	CAAT-box	CAAAT	1285	1305	Pisum sativum	common cis-acting element in promoter and enhancer regions
GmCOMT18	CAAT-box	CAAT	1330	1350	Nicotiana glutinosa
GmCOMT18	CAAT-box	CAAT	1383	1403	Nicotiana glutinosa
GmCOMT18	CAAT-box	CAAT	1402	1422	Nicotiana glutinosa
GmCOMT18	CAAT-box	CAAAT	1454	1474	Pisum sativum	common cis-acting element in promoter and enhancer regions
GmCOMT18	CAAT-box	CAAAT	1470	1490	Pisum sativum	common cis-acting element in promoter and enhancer regions
GmCOMT18	CAAT-box	CAAAT	1483	1503	Pisum sativum	common cis-acting element in promoter and enhancer regions
GmCOMT18	CAAT-box	CAAT	1591	1611	Nicotiana glutinosa
GmCOMT18	CAAT-box	CAAAT	1646	1666	Pisum sativum	common cis-acting element in promoter and enhancer regions
GmCOMT18	CAAT-box	CAAAT	1654	1674	Pisum sativum	common cis-acting element in promoter and enhancer regions
GmCOMT18	CAAT-box	CAAT	1693	1713	Nicotiana glutinosa
GmCOMT18	CAAT-box	CAAT	1726	1746	Nicotiana glutinosa
GmCOMT18	CAAT-box	CAAAT	1824	1844	Pisum sativum	common cis-acting element in promoter and enhancer regions
GmCOMT18	CAAT-box	CAAAT	1829	1849	Pisum sativum	common cis-acting element in promoter and enhancer regions
GmCOMT18	CAAT-box	CAAAT	1855	1875	Pisum sativum	common cis-acting element in promoter and enhancer regions
GmCOMT18	CAAT-box	CAAAT	1868	1888	Pisum sativum	common cis-acting element in promoter and enhancer regions
GmCOMT18	CAAT-box	CAAT	1891	1911	Nicotiana glutinosa
GmCOMT18	CAAT-box	CAAT	1986	2006	Nicotiana glutinosa
GmCOMT18	ATCT-motif	AATCTAATCC	361	381	Pisum sativum	part of a conserved DNA module involved in light responsiveness
GmCOMT18	TCT-motif	TCTTAC	1178	1198	Arabidopsis thaliana	part of a light responsive element
GmCOMT18	TCT-motif	TCTTAC	1276	1296	Arabidopsis thaliana	part of a light responsive element
GmCOMT18	LTR	CCGAAA	223	243	Hordeum vulgare	cis-acting element involved in low-temperature responsiveness
GmCOMT18	AE-box	AGAAACAA	58	78	Arabidopsis thaliana	part of a module for light response
GmCOMT18	TGACG-motif	TGACG	1789	1809	Hordeum vulgare	cis-acting regulatory element involved in the MeJA-responsiveness
GmCOMT18	W box	TTGACC	555	575	Arabidopsis thaliana
GmCOMT18	CGTCA-motif	CGTCA	1789	1809	Hordeum vulgare	cis-acting regulatory element involved in the MeJA-responsiveness
GmCOMT18	WUN-motif	AAATTACT	1281	1301	Nicotiana glutinosa
GmCOMT18	WUN-motif	AAATTACT	1801	1821	Nicotiana glutinosa
GmCOMT18	STRE	AGGGG	1171	1191	Arabidopsis thaliana
GmCOMT18	STRE	AGGGG	1565	1585	Arabidopsis thaliana
GmCOMT18	MYC	CATGTG	1613	1633	Arabidopsis thaliana
GmCOMT18	MYC	CATGTG	1638	1658	Arabidopsis thaliana
GmCOMT18	MYC	CATTTG	1654	1674	Arabidopsis thaliana
GmCOMT18	GT1-motif	GGTTAA	109	129	Arabidopsis thaliana	light responsive element
GmCOMT18	GT1-motif	GGTTAA	582	602	Arabidopsis thaliana	light responsive element
GmCOMT18	GT1-motif	GGTTAA	1307	1327	Arabidopsis thaliana	light responsive element
GmCOMT18	as-1	TGACG	1789	1809	Arabidopsis thaliana
GmCOMT42	GA-motif	ATAGATAA	1562	1582	Arabidopsis thaliana	part of a light responsive element
GmCOMT42	GCN4_motif	TGAGTCA	1163	1183	Oryza sativa	cis-regulatory element involved in endosperm expression
GmCOMT42	P-box	CCTTTTG	871	891	Oryza sativa	gibberellin-responsive element
GmCOMT42	Box 4	ATTAAT	167	187	Petroselinum crispum	part of a conserved DNA module involved in light responsiveness
GmCOMT42	Box 4	ATTAAT	207	227	Petroselinum crispum	part of a conserved DNA module involved in light responsiveness
GmCOMT42	Box 4	ATTAAT	445	465	Petroselinum crispum	part of a conserved DNA module involved in light responsiveness
GmCOMT42	Box 4	ATTAAT	449	469	Petroselinum crispum	part of a conserved DNA module involved in light responsiveness
GmCOMT42	Box 4	ATTAAT	453	473	Petroselinum crispum	part of a conserved DNA module involved in light responsiveness
GmCOMT42	Box 4	ATTAAT	457	477	Petroselinum crispum	part of a conserved DNA module involved in light responsiveness
GmCOMT42	Box 4	ATTAAT	461	481	Petroselinum crispum	part of a conserved DNA module involved in light responsiveness
GmCOMT42	Box 4	ATTAAT	465	485	Petroselinum crispum	part of a conserved DNA module involved in light responsiveness
GmCOMT42	Box 4	ATTAAT	469	489	Petroselinum crispum	part of a conserved DNA module involved in light responsiveness
GmCOMT42	Box 4	ATTAAT	587	607	Petroselinum crispum	part of a conserved DNA module involved in light responsiveness
GmCOMT42	Box 4	ATTAAT	708	728	Petroselinum crispum	part of a conserved DNA module involved in light responsiveness
GmCOMT42	Box 4	ATTAAT	1586	1606	Petroselinum crispum	part of a conserved DNA module involved in light responsiveness
GmCOMT42	Box 4	ATTAAT	1766	1786	Petroselinum crispum	part of a conserved DNA module involved in light responsiveness
GmCOMT42	ERE	ATTTCATA	272	292	Nicotiana glutinos
GmCOMT42	ERE	ATTTTAAA	285	305	Nicotiana glutinos
GmCOMT42	ERE	ATTTTAAA	1123	1143	Nicotiana glutinos
GmCOMT42	ERE	ATTTTAAA	1644	1664	Nicotiana glutinos
GmCOMT42	ERE	ATTTTAAA	1646	1666	Nicotiana glutinos
GmCOMT42	chs-CMA1a	TTACTTAA	489	509	Daucus carota	part of a light responsive element
GmCOMT42	WRE3	CCACCT	476	496	Pisum sativum
GmCOMT42	MYC	CATTTG	436	456	Arabidopsis thaliana
GmCOMT42	MYC	CATGTG	981	1001	Arabidopsis thaliana
GmCOMT42	as-1	TGACG	1068	1088	Arabidopsis thaliana
GmCOMT42	CGTCA-motif	CGTCA	1068	1088	Hordeum vulgare	cis-acting regulatory element involved in the MeJA-responsiveness
GmCOMT42	Myc	TCTCTTA	1469	1489	Arabidopsis thaliana
GmCOMT42	Myc	TCTCTTA	1489	1509	Arabidopsis thaliana
GmCOMT42	WUN-motif	TAATTACTC	483	503	Nicotiana glutinosa
GmCOMT42	WUN-motif	AAATTTCTT	725	745	Nicotiana glutinosa
GmCOMT42	WUN-motif	AAATTTCTT	1377	1397	Nicotiana glutinosa
GmCOMT42	WUN-motif	AAATTACT	1530	1550	Nicotiana glutinosa
GmCOMT42	RY-element	CATGCATG	761	781	Helianthus annuus	cis-acting regulatory element involved in seed-specific regulation
GmCOMT42	ARE	AAACCA	216	236	Zea mays	cis-acting regulatory element essential for the anaerobic induction
GmCOMT42	TGACG-motif	TGACG	1068	1088	Hordeum vulgare	cis-acting regulatory element involved in the MeJA-responsiveness
GmCOMT42	W box	TTGACC	1081	1101	Arabidopsis thaliana
GmCOMT42	MYB	TAACCA	799	819	Arabidopsis thaliana
GmCOMT42	LTR	CCGAAA	1928	1948	Hordeum vulgare	cis-acting element involved in low-temperature responsiveness
GmCOMT42	TCT-motif	TCTTAC	502	522	Arabidopsis thaliana	part of a light responsive element
GmCOMT42	TCT-motif	TCTTAC	531	551	Arabidopsis thaliana	part of a light responsive element
GmCOMT42	TCT-motif	TCTTAC	1509	1529	Arabidopsis thaliana	part of a light responsive element
GmCOMT42	CAAT-box	CAAAT	-1	19	Pisum sativum	common cis-acting element in promoter and enhancer regions
GmCOMT42	CAAT-box	CAAT	88	108	Nicotiana glutinosa
GmCOMT42	CAAT-box	CCAAT	100	120	Arabidopsis thaliana	common cis-acting element in promoter and enhancer regions
GmCOMT42	CAAT-box	CAAT	108	128	Nicotiana glutinosa
GmCOMT42	CAAT-box	CAAAT	164	184	Pisum sativum	common cis-acting element in promoter and enhancer regions
GmCOMT42	CAAT-box	CAAAT	204	224	Pisum sativum	common cis-acting element in promoter and enhancer regions
GmCOMT42	CAAT-box	CAAAT	211	231	Pisum sativum	common cis-acting element in promoter and enhancer regions
GmCOMT42	CAAT-box	CAAT	226	246	Nicotiana glutinosa
GmCOMT42	CAAT-box	CAAAT	327	347	Pisum sativum	common cis-acting element in promoter and enhancer regions
GmCOMT42	CAAT-box	CAAT	375	395	Nicotiana glutinosa
GmCOMT42	CAAT-box	CAAT	399	419	Nicotiana glutinosa
GmCOMT42	CAAT-box	CAAT	414	434	Nicotiana glutinosa
GmCOMT42	CAAT-box	CAAAT	437	457	Pisum sativum	common cis-acting element in promoter and enhancer regions
GmCOMT42	CAAT-box	CAAAT	608	628	Pisum sativum	common cis-acting element in promoter and enhancer regions
GmCOMT42	CAAT-box	CAAT	645	665	Nicotiana glutinosa
GmCOMT42	CAAT-box	CAAT	712	732	Nicotiana glutinosa
GmCOMT42	CAAT-box	CAAAT	921	941	Pisum sativum	common cis-acting element in promoter and enhancer regions
GmCOMT42	CAAT-box	CAAT	962	982	Nicotiana glutinosa
GmCOMT42	CAAT-box	CAAT	991	1011	Nicotiana glutinosa
GmCOMT42	CAAT-box	CCAAT	999	1019	Arabidopsis thaliana	common cis-acting element in promoter and enhancer regions
GmCOMT42	CAAT-box	CAAT	1000	1020	Nicotiana glutinosa
GmCOMT42	CAAT-box	CAAAT	1006	1026	Pisum sativum	common cis-acting element in promoter and enhancer regions
GmCOMT42	CAAT-box	CAAT	1080	1100	Nicotiana glutinosa
GmCOMT42	CAAT-box	CAAAT	1109	1129	Pisum sativum	common cis-acting element in promoter and enhancer regions
GmCOMT42	CAAT-box	CAAT	1157	1177	Nicotiana glutinosa
GmCOMT42	CAAT-box	CAAT	1161	1181	Nicotiana glutinosa
GmCOMT42	CAAT-box	CAAT	1201	1221	Nicotiana glutinosa
GmCOMT42	CAAT-box	CAAAT	1206	1226	Pisum sativum	common cis-acting element in promoter and enhancer regions
GmCOMT42	CAAT-box	CAAT	1217	1237	Nicotiana glutinosa
GmCOMT42	CAAT-box	CAAT	1280	1300	Nicotiana glutinosa
GmCOMT42	CAAT-box	CAAT	1318	1338	Nicotiana glutinosa
GmCOMT42	CAAT-box	CAAT	1332	1352	Nicotiana glutinosa
GmCOMT42	CAAT-box	CAAAT	1419	1439	Pisum sativum	common cis-acting element in promoter and enhancer regions
GmCOMT42	CAAT-box	CAAAT	1436	1456	Pisum sativum	common cis-acting element in promoter and enhancer regions
GmCOMT42	CAAT-box	CAAT	1444	1464	Nicotiana glutinosa
GmCOMT42	CAAT-box	CAAT	1455	1475	Nicotiana glutinosa
GmCOMT42	CAAT-box	CAAAT	1478	1498	Pisum sativum	common cis-acting element in promoter and enhancer regions
GmCOMT42	CAAT-box	CAAT	1500	1520	Nicotiana glutinosa
GmCOMT42	CAAT-box	CAAAT	1534	1554	Pisum sativum	common cis-acting element in promoter and enhancer regions
GmCOMT42	CAAT-box	CAAAT	1541	1561	Pisum sativum	common cis-acting element in promoter and enhancer regions
GmCOMT42	CAAT-box	CAAT	1635	1655	Nicotiana glutinosa
GmCOMT42	CAAT-box	CAAT	1713	1733	Nicotiana glutinosa
GmCOMT42	CAAT-box	CAAT	1739	1759	Nicotiana glutinosa
GmCOMT42	CAAT-box	CCAAT	1797	1817	Arabidopsis thaliana	common cis-acting element in promoter and enhancer regions
GmCOMT42	CAAT-box	CAAT	1798	1818	Nicotiana glutinosa
GmCOMT42	CAAT-box	CAAT	1907	1927	Nicotiana glutinosa
GmCOMT44	as-1	TGACG	1270	1290	Arabidopsis thaliana
GmCOMT44	MYC	CAATTG	595	615	Arabidopsis thaliana
GmCOMT44	MYC	CATGTG	1404	1424	Arabidopsis thaliana
GmCOMT44	MYC	CATGTG	1594	1614	Arabidopsis thaliana
GmCOMT44	MYC	CAATTG	1653	1673	Arabidopsis thaliana
GmCOMT44	MYC	CATTTG	1790	1810	Arabidopsis thaliana
GmCOMT44	MYC	CATGTG	1857	1877	Arabidopsis thaliana
GmCOMT44	MYC	CATTTG	1875	1895	Arabidopsis thaliana
GmCOMT44	MYC	CAATTG	1912	1932	Arabidopsis thaliana
GmCOMT44	STRE	AGGGG	244	264	Arabidopsis thaliana
GmCOMT44	Myc	TCTCTTA	1156	1176	Arabidopsis thaliana
GmCOMT44	Myc	TCTCTTA	1743	1763	Arabidopsis thaliana
GmCOMT44	CGTCA-motif	CGTCA	1270	1290	Hordeum vulgare	cis-acting regulatory element involved in the MeJA-responsiveness
GmCOMT44	circadian	CAAAGATATC	1569	1589	Lycopersicon esculentum	cis-acting regulatory element involved in circadian control
GmCOMT44	ARE	AAACCA	294	314	Zea mays	cis-acting regulatory element essential for the anaerobic induction
GmCOMT44	TGACG-motif	TGACG	1270	1290	Hordeum vulgare	cis-acting regulatory element involved in the MeJA-responsiveness
GmCOMT44	W box	TTGACC	1777	1797	Arabidopsis thaliana
GmCOMT44	LAMP-element	CTTTATCA	1606	1626	Pisum sativum	part of a light responsive element
GmCOMT44	TCT-motif	TCTTAC	590	610	Arabidopsis thaliana	part of a light responsive element
GmCOMT44	TCT-motif	TCTTAC	1742	1762	Arabidopsis thaliana	part of a light responsive element
GmCOMT44	O2-site	GATGATGTGG	113	133	Zea mays	cis-acting regulatory element involved in zein metabolism regulation
GmCOMT44	CAAT-box	CAAAT	3	23	Pisum sativum	common cis-acting element in promoter and enhancer regions
GmCOMT44	CAAT-box	CAAT	18	38	Nicotiana glutinosa
GmCOMT44	CAAT-box	CAAT	45	65	Nicotiana glutinosa
GmCOMT44	CAAT-box	CAAAT	52	72	Pisum sativum	common cis-acting element in promoter and enhancer regions
GmCOMT44	CAAT-box	CAAT	107	127	Nicotiana glutinosa
GmCOMT44	CAAT-box	CAAT	162	182	Nicotiana glutinosa
GmCOMT44	CAAT-box	CCAAT	189	209	Arabidopsis thaliana	common cis-acting element in promoter and enhancer regions
GmCOMT44	CAAT-box	CAAT	267	287	Nicotiana glutinosa
GmCOMT44	CAAT-box	CAAAT	309	329	Pisum sativum	common cis-acting element in promoter and enhancer regions
GmCOMT44	CAAT-box	CAAT	316	336	Nicotiana glutinosa
GmCOMT44	CAAT-box	CAAT	408	428	Nicotiana glutinosa
GmCOMT44	CAAT-box	CAAT	418	438	Nicotiana glutinosa
GmCOMT44	CAAT-box	CAAT	513	533	Nicotiana glutinosa
GmCOMT44	CAAT-box	CAAT	595	615	Nicotiana glutinosa
GmCOMT44	CAAT-box	CAAT	597	617	Nicotiana glutinosa
GmCOMT44	CAAT-box	CAAT	810	830	Nicotiana glutinosa
GmCOMT44	CAAT-box	CAAAT	828	848	Pisum sativum	common cis-acting element in promoter and enhancer regions
GmCOMT44	CAAT-box	CCAAT	905	925	Arabidopsis thaliana	common cis-acting element in promoter and enhancer regions
GmCOMT44	CAAT-box	CAAT	906	926	Nicotiana glutinosa
GmCOMT44	CAAT-box	CAAAT	1015	1035	Pisum sativum	common cis-acting element in promoter and enhancer regions
GmCOMT44	CAAT-box	CAAAT	1220	1240	Pisum sativum	common cis-acting element in promoter and enhancer regions
GmCOMT44	CAAT-box	CAAT	1259	1279	Nicotiana glutinosa
GmCOMT44	CAAT-box	CAAT	1287	1307	Nicotiana glutinosa
GmCOMT44	CAAT-box	CAAT	1318	1338	Nicotiana glutinosa
GmCOMT44	CAAT-box	CAAT	1335	1355	Nicotiana glutinosa
GmCOMT44	CAAT-box	CAAT	1444	1464	Nicotiana glutinosa
GmCOMT44	CAAT-box	CCAAT	1493	1513	Arabidopsis thaliana	common cis-acting element in promoter and enhancer regions
GmCOMT44	CAAT-box	CAAT	1494	1514	Nicotiana glutinosa
GmCOMT44	CAAT-box	CAAT	1551	1571	Nicotiana glutinosa
GmCOMT44	CAAT-box	CAAT	1559	1579	Nicotiana glutinosa
GmCOMT44	CAAT-box	CAAAT	1561	1581	Pisum sativum	common cis-acting element in promoter and enhancer regions
GmCOMT44	CAAT-box	CAAT	1623	1643	Nicotiana glutinosa
GmCOMT44	CAAT-box	CAAT	1653	1673	Nicotiana glutinosa
GmCOMT44	CAAT-box	CCAAT	1655	1675	Arabidopsis thaliana	common cis-acting element in promoter and enhancer regions
GmCOMT44	CAAT-box	TGCCAAC	1692	1712	Petunia hybrida	common cis-acting element in promoter and enhancer regions
GmCOMT44	CAAT-box	CAAT	1715	1735	Nicotiana glutinosa
GmCOMT44	CAAT-box	CCAAT	1730	1750	Arabidopsis thaliana	common cis-acting element in promoter and enhancer regions
GmCOMT44	CAAT-box	CAAT	1731	1751	Nicotiana glutinosa
GmCOMT44	CAAT-box	CAAT	1780	1800	Nicotiana glutinosa
GmCOMT44	CAAT-box	CAAAT	1791	1811	Pisum sativum	common cis-acting element in promoter and enhancer regions
GmCOMT44	CAAT-box	CAAAT	1876	1896	Pisum sativum	common cis-acting element in promoter and enhancer regions
GmCOMT44	CAAT-box	CAAT	1899	1919	Nicotiana glutinosa
GmCOMT44	CAAT-box	CAAT	1912	1932	Nicotiana glutinosa
GmCOMT44	CAAT-box	CAAT	1914	1934	Nicotiana glutinosa
GmCOMT44	CAAT-box	CAAT	1931	1951	Nicotiana glutinosa
GmCOMT44	MYB	TAACCA	1934	1954	Arabidopsis thaliana
GmCOMT44	MRE	AACCTAA	1052	1072	Petroselinum crispum	MYB binding site involved in light responsiveness
GmCOMT44	I-box	cCATATCCAAT	189	209	Flaveria trinervia	part of a light responsive element
GmCOMT44	TCA-element	TCAGAAGAGG	1191	1211	Brassica oleracea	cis-acting element involved in salicylic acid responsiveness
GmCOMT44	Box 4	ATTAAT	352	372	Petroselinum crispum	part of a conserved DNA module involved in light responsiveness
GmCOMT44	Box 4	ATTAAT	367	387	Petroselinum crispum	part of a conserved DNA module involved in light responsiveness
GmCOMT44	Box 4	ATTAAT	404	424	Petroselinum crispum	part of a conserved DNA module involved in light responsiveness
GmCOMT44	Box 4	ATTAAT	505	525	Petroselinum crispum	part of a conserved DNA module involved in light responsiveness
GmCOMT44	Box 4	ATTAAT	509	529	Petroselinum crispum	part of a conserved DNA module involved in light responsiveness
GmCOMT44	Box 4	ATTAAT	673	693	Petroselinum crispum	part of a conserved DNA module involved in light responsiveness
GmCOMT44	Box 4	ATTAAT	704	724	Petroselinum crispum	part of a conserved DNA module involved in light responsiveness
GmCOMT44	Box 4	ATTAAT	1320	1340	Petroselinum crispum	part of a conserved DNA module involved in light responsiveness
GmCOMT44	Box 4	ATTAAT	1359	1379	Petroselinum crispum	part of a conserved DNA module involved in light responsiveness
GmCOMT44	Box 4	ATTAAT	1679	1699	Petroselinum crispum	part of a conserved DNA module involved in light responsiveness
GmCOMT44	3-AF1 binding site	TAAGAGAGGAA	1743	1763	Solanum tuberosum	light responsive element
GmCOMT44	TC-rich repeats	ATTCTCTAAC	373	393	Nicotiana tabacum	cis-acting element involved in defense and stress responsiveness
GmCOMT44	ERE	ATTTTAAA	303	323	Nicotiana glutinos
GmCOMT44	ERE	ATTTTAAA	346	366	Nicotiana glutinos
GmCOMT44	ERE	ATTTTAAA	383	403	Nicotiana glutinos
GmCOMT44	ERE	ATTTTAAA	544	564	Nicotiana glutinos
GmCOMT44	ERE	ATTTTAAA	919	939	Nicotiana glutinos
GmCOMT44	TCA	TCATCTTCAT	1733	1753	Pisum sativum
GmCOMT20	as-1	TGACG	1122	1142	Arabidopsis thaliana
GmCOMT20	MYC	CATGTG	227	247	Arabidopsis thaliana
GmCOMT20	MYC	CATGTG	549	569	Arabidopsis thaliana
GmCOMT20	MYC	CATGTG	612	632	Arabidopsis thaliana
GmCOMT20	MYC	CATGTG	829	849	Arabidopsis thaliana
GmCOMT20	STRE	AGGGG	99	119	Arabidopsis thaliana
GmCOMT20	GT1-motif	GGTTAAT	92	112	Avena sativa	light responsive element
GmCOMT20	GT1-motif	GTGTGTGAA	779	799	Solanum tuberosum	light responsive element
GmCOMT20	CGTCA-motif	CGTCA	1122	1142	Hordeum vulgare	cis-acting regulatory element involved in the MeJA-responsiveness
GmCOMT20	TGACG-motif	TGACG	1122	1142	Hordeum vulgare	cis-acting regulatory element involved in the MeJA-responsiveness
GmCOMT20	ARE	AAACCA	1066	1086	Zea mays	cis-acting regulatory element essential for the anaerobic induction
GmCOMT20	G-box	CACGTG	746	766	Arabidopsis thaliana	cis-acting regulatory element involved in light responsiveness
GmCOMT20	G-box	TAACACGTAG	761	781	Brassica oleracea	cis-acting regulatory element involved in light responsiveness
GmCOMT20	G-box	TAACACGTAG	1629	1649	Brassica oleracea	cis-acting regulatory element involved in light responsiveness
GmCOMT20	G-box	TACGTG	1632	1652	Arabidopsis thaliana	cis-acting regulatory element involved in light responsiveness
GmCOMT20	AE-box	AGAAACAA	959	979	Arabidopsis thaliana	part of a module for light response
GmCOMT20	AE-box	AGAAACTT	1775	1795	Arabidopsis thaliana	part of a module for light response
GmCOMT20	Box II	ACACGTAGA	1631	1651	Arabidopsis thaliana	part of a light responsive element
GmCOMT20	LAMP-element	CTTTATCA	1753	1773	Pisum sativum	part of a light responsive element
GmCOMT20	CAAT-box	CCAAT	47	67	Arabidopsis thaliana	common cis-acting element in promoter and enhancer regions
GmCOMT20	CAAT-box	CAAT	81	101	Nicotiana glutinosa
GmCOMT20	CAAT-box	CAAAT	88	108	Pisum sativum	common cis-acting element in promoter and enhancer regions
GmCOMT20	CAAT-box	CAAT	107	127	Nicotiana glutinosa
GmCOMT20	CAAT-box	CAAAT	113	133	Pisum sativum	common cis-acting element in promoter and enhancer regions
GmCOMT20	CAAT-box	CAAAT	158	178	Pisum sativum	common cis-acting element in promoter and enhancer regions
GmCOMT20	CAAT-box	CAAT	200	220	Nicotiana glutinosa
GmCOMT20	CAAT-box	CAAT	207	227	Nicotiana glutinosa
GmCOMT20	CAAT-box	CAAT	309	329	Nicotiana glutinosa
GmCOMT20	CAAT-box	CAAAT	357	377	Pisum sativum	common cis-acting element in promoter and enhancer regions
GmCOMT20	CAAT-box	CCAAT	383	403	Arabidopsis thaliana	common cis-acting element in promoter and enhancer regions
GmCOMT20	CAAT-box	CCAAT	431	451	Arabidopsis thaliana	common cis-acting element in promoter and enhancer regions
GmCOMT20	CAAT-box	CAAT	432	452	Nicotiana glutinosa
GmCOMT20	CAAT-box	CAAAT	444	464	Pisum sativum	common cis-acting element in promoter and enhancer regions
GmCOMT20	CAAT-box	CAAAT	484	504	Pisum sativum	common cis-acting element in promoter and enhancer regions
GmCOMT20	CAAT-box	CAAAT	521	541	Pisum sativum	common cis-acting element in promoter and enhancer regions
GmCOMT20	CAAT-box	CCAAT	568	588	Arabidopsis thaliana	common cis-acting element in promoter and enhancer regions
GmCOMT20	CAAT-box	CAAT	569	589	Nicotiana glutinosa
GmCOMT20	CAAT-box	CAAAT	571	591	Pisum sativum	common cis-acting element in promoter and enhancer regions
GmCOMT20	CAAT-box	CAAT	605	625	Nicotiana glutinosa
GmCOMT20	CAAT-box	CAAAT	607	627	Pisum sativum	common cis-acting element in promoter and enhancer regions
GmCOMT20	CAAT-box	CAAAT	644	664	Pisum sativum	common cis-acting element in promoter and enhancer regions
GmCOMT20	CAAT-box	CAAT	718	738	Nicotiana glutinosa
GmCOMT20	CAAT-box	CAAAT	770	790	Pisum sativum	common cis-acting element in promoter and enhancer regions
GmCOMT20	CAAT-box	CAAT	776	796	Nicotiana glutinosa
GmCOMT20	CAAT-box	CAAAT	868	888	Pisum sativum	common cis-acting element in promoter and enhancer regions
GmCOMT20	CAAT-box	CAAT	883	903	Nicotiana glutinosa
GmCOMT20	CAAT-box	CAAT	922	942	Nicotiana glutinosa
GmCOMT20	CAAT-box	CAAT	1107	1127	Nicotiana glutinosa
GmCOMT20	CAAT-box	CAAAT	1147	1167	Pisum sativum	common cis-acting element in promoter and enhancer regions
GmCOMT20	CAAT-box	CAAT	1209	1229	Nicotiana glutinosa
GmCOMT20	CAAT-box	CCAAT	1217	1237	Arabidopsis thaliana	common cis-acting element in promoter and enhancer regions
GmCOMT20	CAAT-box	CAAT	1230	1250	Nicotiana glutinosa
GmCOMT20	CAAT-box	CAAAT	1252	1272	Pisum sativum	common cis-acting element in promoter and enhancer regions
GmCOMT20	CAAT-box	CCAAT	1301	1321	Arabidopsis thaliana	common cis-acting element in promoter and enhancer regions
GmCOMT20	CAAT-box	CAAAT	1372	1392	Pisum sativum	common cis-acting element in promoter and enhancer regions
GmCOMT20	CAAT-box	CAAAT	1379	1399	Pisum sativum	common cis-acting element in promoter and enhancer regions
GmCOMT20	CAAT-box	CAAT	1427	1447	Nicotiana glutinosa
[truncated: 2,376 more rows]
