# Supplementary material for: Genome-Wide Identification and Characterization of Caffeic Acid O-Methyltransferase Gene Family in Soybean
Source: Plants (Basel). 2021 Dec 20;10(12):2816. doi: 10.3390/plants10122816 (PMC8703356; doi:10.3390/plants10122816)
Supplement: Supplementary file 1 [file plants-10-02816-s001.zip › Table S10. The numbers of cis-elements in GmCOMT gene family.xlsx]

## Sheet: Sheet1
Table S10. The numbers of cis-elements related to growth and development in GmCOMT gene family.
id	HD-Zip	CAAT-box	O2-site	CAT-box	circadian	RY-element	MSA-like	GCN4_motif	RY-element	AACA_motif	CCGTCC-box
GmCOMT1	0	33	0	0	1	0	0	0	0	0	0
GmCOMT2	0	48	0	0	0	0	0	0	0	0	0
GmCOMT3	1	39	0	0	0	0	0	0	0	0	0
GmCOMT4	0	40	0	0	0	0	0	0	0	0	0
GmCOMT5	1	43	0	2	0	0	0	0	0	0	0
GmCOMT6	0	51	0	0	0	0	0	0	0	0	0
GmCOMT7	0	51	1	0	0	0	0	0	0	0	1
GmCOMT8	1	28	0	1	0	0	0	0	0	0	0
GmCOMT9	0	38	1	1	0	0	0	2	0	0	0
GmCOMT10	1	55	0	1	1	0	0	0	0	0	1
GmCOMT11	0	28	1	0	0	0	0	1	0	0	0
GmCOMT12	0	37	1	0	0	0	0	0	0	0	0
GmCOMT13	0	37	0	0	0	0	0	0	0	0	0
GmCOMT14	0	31	0	0	0	0	0	0	0	0	0
GmCOMT15	0	39	0	0	1	0	0	0	0	0	0
GmCOMT16	0	34	0	0	0	0	0	0	0	1	0
GmCOMT17	0	46	0	1	1	0	0	0	0	0	0
GmCOMT18	0	35	0	0	0	0	0	0	0	0	0
GmCOMT19	0	43	1	0	1	0	0	0	0	0	0
GmCOMT20	0	48	0	0	0	0	0	1	0	1	0
GmCOMT21	0	37	0	0	0	1	0	0	1	0	1
GmCOMT22	1	53	0	0	0	1	0	1	1	0	0
GmCOMT23	0	48	0	0	0	0	0	0	0	0	0
GmCOMT24	0	46	0	2	0	0	0	0	0	0	0
GmCOMT25	0	40	0	1	0	0	0	0	0	0	0
GmCOMT26	0	36	0	0	0	0	0	0	0	0	0
GmCOMT27	0	31	0	0	0	0	0	0	0	0	0
GmCOMT28	0	41	2	0	0	0	0	0	0	0	0
GmCOMT29	0	36	1	0	0	0	0	0	0	1	0
GmCOMT30	0	27	1	0	0	0	0	0	0	0	0
GmCOMT31	0	37	0	0	0	1	0	0	1	0	0
GmCOMT32	0	49	0	0	0	1	0	2	1	0	0
GmCOMT33	0	30	1	0	0	0	0	0	0	0	0
GmCOMT34	1	39	0	3	0	0	0	1	0	0	1
GmCOMT35	0	47	0	0	2	0	0	1	0	0	0
GmCOMT36	0	33	0	0	0	0	1	0	0	0	0
GmCOMT37	0	33	0	0	0	0	0	0	0	0	0
GmCOMT38	0	29	2	0	1	0	0	0	0	0	0
GmCOMT39	0	38	1	0	0	0	0	0	0	0	0
GmCOMT40	0	42	0	0	1	0	0	0	0	0	0
GmCOMT41	0	38	2	0	0	0	0	0	0	0	0
GmCOMT42	0	46	0	0	0	1	0	1	1	0	0
GmCOMT43	0	39	0	0	0	1	1	1	1	0	0
GmCOMT44	0	45	1	0	1	0	0	0	0	0	0
GmCOMT45	1	35	0	3	0	0	0	0	0	0	1
GmCOMT46	0	52	0	0	1	0	0	1	0	0	0
GmCOMT47	0	39	1	1	0	0	0	0	0	0	0
GmCOMT48	0	45	0	2	1	0	0	0	0	0	0
GmCOMT49	0	35	1	1	0	0	0	0	0	0	0
GmCOMT50	0	34	0	1	0	0	0	0	0	0	0
GmCOMT51	0	32	1	0	0	0	0	1	0	0	1
GmCOMT52	0	41	0	0	0	0	0	1	0	0	0
GmCOMT53	1	51	1	1	0	0	0	1	0	0	1
GmCOMT54	0	48	0	1	0	0	0	0	0	0	1
GmCOMT55	0	38	0	1	0	1	0	1	1	0	0

## Sheet: Sheet2
Table S10. The numbers of cis-elements related to light response in GmCOMT gene family.
id	ACE	Sp1	MRE	Box	I-box	Box	G-Box	L-box	AE-box	AT1-motif	GT1-motif	TCT-motif	TCCC-motif	GATA-motif	ATCT-motif	chs-CMA1a	chs-CMA2a	LAMP-element	3-AF1	Gap-box
GmCOMT1	0	0	0	4	0	4	3	0	0	0	1	2	0	2	0	0	0	0	0	1
GmCOMT2	0	0	0	7	0	7	5	0	0	1	1	1	0	0	0	0	1	0	0	0
GmCOMT3	0	0	2	5	1	5	1	0	0	2	0	0	0	0	0	0	0	0	0	0
GmCOMT4	0	0	1	9	1	9	7	0	0	0	2	2	1	0	0	0	0	0	0	0
GmCOMT5	0	0	0	3	0	3	0	0	0	0	0	3	0	1	0	0	0	0	0	0
GmCOMT6	0	0	0	2	0	2	4	0	1	1	0	0	0	0	0	0	0	0	0	0
GmCOMT7	0	1	1	7	0	7	4	0	0	0	1	1	0	0	1	0	0	0	0	0
GmCOMT8	0	0	0	6	2	6	3	0	0	0	0	0	0	0	0	0	0	0	0	0
GmCOMT9	0	0	0	1	0	1	0	0	1	0	0	2	2	1	0	1	0	1	0	0
GmCOMT10	0	3	0	5	1	5	6	0	0	0	1	1	0	0	0	1	0	0	0	0
GmCOMT11	1	0	0	5	2	5	1	0	1	0	1	0	0	1	0	1	0	1	0	0
GmCOMT12	2	0	0	10	0	10	6	0	2	0	0	1	0	0	0	1	0	0	1	0
GmCOMT13	0	0	0	3	0	3	0	0	1	0	1	0	0	1	0	0	0	1	0	0
GmCOMT14	0	0	3	9	0	9	7	0	1	0	1	1	0	0	0	1	0	0	0	0
GmCOMT15	0	1	0	5	0	5	1	0	1	1	3	2	0	2	1	1	0	0	0	0
GmCOMT16	0	0	0	6	0	6	4	0	1	0	0	2	0	0	0	0	1	0	0	0
GmCOMT17	0	0	1	2	0	2	6	1	0	0	2	1	0	0	0	1	0	1	0	0
GmCOMT18	0	0	0	7	0	7	0	0	1	0	3	2	0	1	1	1	0	0	0	0
GmCOMT19	0	0	0	2	0	2	2	0	1	0	0	0	0	0	0	0	0	0	0	0
GmCOMT20	0	0	0	4	1	4	6	0	2	0	2	0	0	0	0	0	0	1	0	0
GmCOMT21	0	0	1	7	1	7	1	0	0	1	0	0	0	0	0	0	0	0	0	1
GmCOMT22	0	0	0	6	0	6	1	0	0	1	4	2	0	0	0	1	0	0	0	0
GmCOMT23	0	0	0	8	0	8	2	0	0	1	0	0	0	0	0	1	0	0	0	0
GmCOMT24	1	1	1	7	0	7	3	0	0	0	0	2	0	0	0	1	0	0	0	1
GmCOMT25	0	1	0	3	0	3	6	0	0	0	0	1	0	0	0	0	0	1	0	2
GmCOMT26	0	0	0	3	0	3	2	0	0	0	0	1	0	0	0	0	1	0	0	0
GmCOMT27	0	0	0	6	0	6	0	0	0	1	1	0	0	0	0	0	0	0	0	0
GmCOMT28	0	0	1	3	0	3	2	0	1	0	0	1	0	1	0	0	0	0	0	0
GmCOMT29	0	0	1	5	1	5	0	0	1	0	3	0	0	0	1	0	1	0	0	0
GmCOMT30	0	0	1	5	0	5	3	0	1	0	4	1	0	0	0	0	0	0	0	0
GmCOMT31	0	0	2	3	0	3	2	0	2	1	2	1	0	0	0	1	0	0	0	0
GmCOMT32	0	0	2	4	0	4	2	0	2	1	4	1	0	0	0	1	0	0	0	0
GmCOMT33	0	0	0	4	0	4	0	0	0	0	0	1	0	0	0	1	0	0	2	1
GmCOMT34	0	0	0	4	0	4	4	0	1	0	2	3	0	1	0	1	0	0	0	0
GmCOMT35	0	0	0	1	1	1	1	0	2	0	5	2	0	0	0	0	0	0	0	0
GmCOMT36	0	0	2	6	0	6	4	0	1	0	1	0	0	0	0	0	0	0	1	0
GmCOMT37	0	0	0	7	0	7	0	0	1	1	0	1	0	2	0	0	0	0	0	0
GmCOMT38	0	1	0	3	0	3	0	0	1	0	1	0	2	1	0	0	0	0	0	0
GmCOMT39	0	0	1	5	0	5	5	0	0	3	0	2	0	0	0	0	0	0	0	0
GmCOMT40	0	1	1	4	0	4	0	0	0	1	4	0	0	0	0	0	0	0	0	0
GmCOMT41	0	0	2	7	2	7	1	0	1	0	2	0	1	0	0	0	0	0	0	0
GmCOMT42	0	0	0	13	0	13	0	0	0	0	0	3	0	0	0	1	0	0	0	0
GmCOMT43	0	0	0	12	0	12	1	0	2	0	0	2	0	0	0	0	0	0	0	0
GmCOMT44	0	0	1	10	1	10	0	0	0	0	0	2	0	0	0	0	0	1	1	0
GmCOMT45	0	0	0	7	0	7	2	0	0	0	0	1	0	3	0	0	0	1	1	0
GmCOMT46	0	0	0	1	0	1	4	0	0	2	0	1	1	2	0	0	0	0	0	0
GmCOMT47	0	0	1	7	0	7	3	0	1	0	2	1	0	0	0	0	0	0	0	0
GmCOMT48	0	0	1	4	0	4	0	0	0	0	2	1	0	2	0	0	1	0	0	0
GmCOMT49	0	0	1	6	0	6	1	0	0	0	2	0	0	1	0	0	0	0	0	0
GmCOMT50	1	0	0	2	0	2	2	0	0	0	1	0	0	0	0	0	0	0	0	0
GmCOMT51	0	0	0	4	0	4	3	0	0	0	1	1	0	0	0	1	0	0	0	1
GmCOMT52	0	0	0	4	0	4	3	0	0	0	1	1	0	0	0	0	0	0	0	0
GmCOMT53	0	0	0	2	0	2	1	0	0	0	2	0	1	0	1	0	0	1	0	0
GmCOMT54	0	0	2	2	1	2	3	0	0	0	0	1	0	1	0	0	0	0	0	0
GmCOMT55	1	0	0	4	0	4	0	1	0	0	0	1	1	0	0	1	0	0	0	0

## Sheet: Sheet3
Table S10. The numbers of cis-elements related to stress response in GmCOMT gene family.
id	MYB	MYC	MBS	WRE3	STRE	DRE1	P-box	W	TC-rich	CAG-motif	WUN-motif	GA-motif	GC-motif	CGTCA-motif	ARE	LTR
GmCOMT1	2	5	1	0	1	0	0	0	0	0	4	0	0	1	1	1
GmCOMT2	6	7	1	1	1	0	0	1	0	0	0	0	0	2	0	1
GmCOMT3	4	3	0	0	1	0	0	0	2	0	1	0	0	0	3	0
GmCOMT4	5	5	0	0	1	0	0	1	1	0	0	0	0	1	4	0
GmCOMT5	3	4	0	0	1	0	0	0	0	0	2	0	0	1	2	1
GmCOMT6	6	3	1	0	2	0	0	3	2	0	1	0	0	1	3	1
GmCOMT7	2	4	0	1	0	0	1	2	0	0	1	2	1	1	0	0
GmCOMT8	1	1	0	1	0	0	1	0	0	0	0	1	0	1	0	0
GmCOMT9	4	8	1	0	1	0	4	2	1	0	0	1	0	1	4	0
GmCOMT10	2	3	0	1	2	0	0	1	0	0	2	2	1	0	0	0
GmCOMT11	3	5	0	0	2	0	0	0	1	0	1	0	0	1	5	0
GmCOMT12	3	2	0	0	1	0	0	0	1	0	2	1	0	3	6	0
GmCOMT13	5	4	1	0	1	0	0	0	0	0	1	0	0	0	3	0
GmCOMT14	7	1	0	1	3	0	2	0	0	0	0	0	0	2	2	0
GmCOMT15	6	5	1	0	2	0	0	1	0	0	1	1	0	2	0	0
GmCOMT16	4	2	1	2	2	0	2	2	0	0	0	0	0	4	3	0
GmCOMT17	7	2	0	1	1	0	2	2	0	0	0	0	0	0	2	0
GmCOMT18	2	3	0	0	2	0	0	1	1	0	2	2	0	1	0	1
GmCOMT19	2	0	0	0	3	0	0	1	1	0	0	0	0	2	2	0
GmCOMT20	3	4	1	0	1	0	0	0	0	0	0	1	0	1	1	0
GmCOMT21	5	2	0	0	0	0	0	0	1	0	3	1	0	0	1	0
GmCOMT22	1	4	0	1	0	0	1	0	1	0	2	0	0	0	2	0
GmCOMT23	2	1	0	0	1	1	0	1	1	0	2	1	0	1	1	0
GmCOMT24	2	5	0	1	1	0	0	1	0	0	1	0	1	2	0	0
GmCOMT25	0	7	0	1	0	0	0	0	0	0	0	0	0	4	2	0
GmCOMT26	4	6	0	0	2	0	1	1	0	0	0	0	0	0	1	1
GmCOMT27	3	1	0	0	1	0	0	1	0	0	0	0	0	1	2	0
GmCOMT28	2	4	0	1	3	0	0	1	0	0	1	0	0	1	5	2
GmCOMT29	7	2	1	2	0	1	0	0	0	0	0	0	1	1	1	1
GmCOMT30	3	1	0	1	0	0	0	0	0	0	1	0	0	0	2	1
GmCOMT31	1	4	0	1	0	0	0	2	0	0	0	1	0	1	2	0
GmCOMT32	4	6	0	1	0	0	0	2	0	0	0	1	0	1	2	0
GmCOMT33	2	5	0	0	3	0	1	0	0	0	1	0	0	1	1	0
GmCOMT34	7	5	2	1	1	0	0	0	0	0	1	0	0	2	2	0
GmCOMT35	9	8	0	0	0	0	1	0	1	0	0	0	0	0	2	0
GmCOMT36	6	1	0	1	0	0	0	1	0	0	2	0	0	0	1	0
GmCOMT37	4	1	1	4	1	0	0	0	0	0	1	0	0	0	2	0
GmCOMT38	4	6	1	0	1	0	0	0	0	0	0	0	0	4	4	0
GmCOMT39	4	3	0	1	1	0	0	1	0	0	0	0	0	2	1	1
GmCOMT40	5	1	0	1	5	2	0	0	1	0	1	0	0	1	1	1
GmCOMT41	4	0	0	1	2	1	0	0	1	0	0	0	0	0	1	0
GmCOMT42	1	4	0	1	0	0	1	1	0	0	4	1	0	1	1	1
GmCOMT43	2	1	0	1	1	0	2	0	0	0	2	0	0	2	0	0
GmCOMT44	1	10	0	0	1	0	0	1	1	0	0	0	0	1	1	0
GmCOMT45	9	5	0	0	0	0	0	0	1	0	0	0	0	1	3	0
GmCOMT46	1	3	0	0	0	0	0	1	0	0	0	0	0	0	3	0
GmCOMT47	8	5	1	2	3	0	0	1	1	1	0	0	0	2	2	0
GmCOMT48	6	0	1	0	1	0	1	1	1	0	1	0	0	2	4	2
GmCOMT49	4	5	2	1	2	0	1	1	0	0	0	0	0	3	1	1
GmCOMT50	7	2	1	1	1	0	0	0	0	0	3	0	0	0	2	0
GmCOMT51	3	5	0	2	0	0	0	1	0	0	0	0	0	0	1	0
GmCOMT52	3	7	0	0	2	0	0	0	1	0	2	0	0	3	0	0
GmCOMT53	7	2	0	2	3	0	0	2	1	0	1	0	0	1	1	0
GmCOMT54	6	5	2	1	0	0	0	0	0	0	1	2	0	1	2	0
GmCOMT55	3	2	1	2	1	0	0	0	0	0	1	0	0	1	4	0

## Sheet: Sheet4
Table S10. The numbers of cis-elements related to hormone response in GmCOMT gene family.
id	TCA	TGACG-motif	TGA-box
GmCOMT1	3	1	0
GmCOMT2	1	2	0
GmCOMT3	1	0	0
GmCOMT4	31	1	0
GmCOMT5	0	1	0
GmCOMT6	2	1	0
GmCOMT7	0	1	0
GmCOMT8	0	1	0
GmCOMT9	1	1	0
GmCOMT10	2	0	0
GmCOMT11	0	1	0
GmCOMT12	0	3	0
GmCOMT13	0	0	0
GmCOMT14	2	2	0
GmCOMT15	0	2	0
GmCOMT16	0	4	0
GmCOMT17	2	0	0
GmCOMT18	1	1	0
GmCOMT19	1	2	0
GmCOMT20	0	1	0
GmCOMT21	3	0	0
GmCOMT22	0	0	0
GmCOMT23	0	1	0
GmCOMT24	0	2	0
GmCOMT25	1	4	0
GmCOMT26	0	0	0
GmCOMT27	1	1	0
GmCOMT28	1	1	0
GmCOMT29	0	1	0
GmCOMT30	2	0	0
GmCOMT31	0	1	0
GmCOMT32	0	1	0
GmCOMT33	0	1	0
GmCOMT34	2	2	0
GmCOMT35	1	0	0
GmCOMT36	2	0	0
GmCOMT37	1	0	0
GmCOMT38	1	4	2
GmCOMT39	2	2	0
GmCOMT40	0	1	0
GmCOMT41	3	0	0
GmCOMT42	0	1	0
GmCOMT43	0	2	0
GmCOMT44	2	1	0
GmCOMT45	3	1	0
GmCOMT46	3	0	0
GmCOMT47	0	2	0
GmCOMT48	2	2	0
GmCOMT49	2	3	0
GmCOMT50	0	0	0
GmCOMT51	2	0	0
GmCOMT52	0	3	0
GmCOMT53	1	1	0
GmCOMT54	0	1	0
GmCOMT55	1	1	0
