# Supplementary material for: Genome-Wide Identification and Characterization of Caffeic Acid O-Methyltransferase Gene Family in Soybean
Source: Plants (Basel). 2021 Dec 20;10(12):2816. doi: 10.3390/plants10122816 (PMC8703356; doi:10.3390/plants10122816)
Supplement: Supplementary file 1 [file plants-10-02816-s001.zip › Table S11. The primers of qRT-PCR.xlsx]

## Sheet: Sheet1
Table S14. The primers of qRT-PCR.
GmCOMT25	F	GGCAGGATTCAGCAACTACAAAA	R	AGATGAAACCGTAGTACACAACGA
GmCOMT33	F	CAAAGTTGCAGCGAGGCATT	R	CCAATCGTGCAAAACCCACA
GmCOMT53	F	ATTGCTGCGCTCAACCTCAT	R	CAACTAGAGATTTAAGACCGCCA
